# Supplementary material
Source: PubMed Central journal article supplement (PMC8595764)
Supplement: NIHMS1740128-supplement-supinfo.pdf [file NIHMS1740128-supplement-supinfo.pdf]

**A transcriptome-wide association study identifies novel candidate susceptibility genes for prostate cancer risk**

**Running title: A transcriptome-wide association study of prostate cancer**

Duo Liu<sup>1,2,\*</sup>, Jingjing Zhu<sup>2,\*</sup>, Dan Zhou<sup>3</sup>, Emily G Nikas<sup>4</sup>, Nikos T Mitanis<sup>5</sup>, Yanfa Sun<sup>2,6,7,8</sup>, Chong Wu<sup>9</sup>, Nicholas Mancuso<sup>10</sup>, Nancy J. Cox<sup>3</sup>, Liang Wang<sup>11</sup>,  
Stephen J Freedland<sup>12,13</sup>, Christopher A Haiman<sup>10</sup>, Eric R. Gamazon<sup>3,14,15</sup>, Jason B Nikas<sup>16</sup>, Lang Wu<sup>2</sup>

\*. These authors contributed equally to this work

**Corresponding to:** Lang Wu, Email: [lwu@cc.hawaii.edu](mailto:lwu@cc.hawaii.edu), phone: (808)564-5965; or Jason B Nikas, [jbnikas@Genomix-inc.com](mailto:jbnikas@Genomix-inc.com), phone: (612)385-5200

### The contents of Supplementary Tables

| Title                                                                                                                                                                                      | Page |
|--------------------------------------------------------------------------------------------------------------------------------------------------------------------------------------------|------|
| Supplementary Table 1 Prediction performance of gene expression prediction models built                                                                                                    | 3    |
| Supplementary Table 2 Two hundred and forty nine genes located at genomic loci at least 500kb away from any GWAS-identified prostate cancer risk variants                                  | 4    |
| Supplementary Table 3 One hundred and ninety four novel genes located at known susceptibility loci that have not yet been reported                                                         | 26   |
| Supplementary Table 4 Seventy-two genes that have been reported in previous TWAS showing the same directions of effect compared with the current study                                     | 45   |
| Supplementary Table 5 Twenty-four genes that have been previous reported as candidate susceptibility genes with the results of both-side direction in TWAS                                 | 59   |
| Supplementary Table 6 Sixteen genes that have been previous reported as candidate susceptibility genes in TWAS with different directions compared with those in the current analyses       | 76   |
| Supplementary Table 7 One hundred and fifty-two genes showing differential expression in tumor vs normal prostate samples with directions of effect consistent with those in TWAS analyses | 81   |
| Supplementary Table 8 151 CpG sites showing biologically significant differential methylation levels between prostate tumor and tumor adjacent normal samples                              | 88   |
| Supplementary Table 9 Pathway enrichment analyses of associated protein-coding genes                                                                                                       | 95   |

**Supplementary Table 1** Prediction performance of gene expression prediction models built

| <b>Model</b>    | <b>Prediction performance (R<sup>2</sup>)</b> | <b>All</b> | <b>Protein</b> | <b>lncRNAs</b> | <b>miRNAs</b> |
|-----------------|-----------------------------------------------|------------|----------------|----------------|---------------|
| PrediXcan       | ≥0.01                                         | 5885       | 4232           | 1652           | 1             |
|                 | ≥0.04                                         | 3917       | 2789           | 1127           | 1             |
|                 | ≥0.09                                         | 2248       | 1547           | 700            | 1             |
|                 | ≥0.16                                         | 1315       | 902            | 412            | 1             |
| Modified UTMOST | ≥0.01                                         | 7782       | 5695           | 2086           | 1             |
|                 | ≥0.04                                         | 5355       | 3850           | 1504           | 1             |
|                 | ≥0.09                                         | 2940       | 2053           | 886            | 1             |
|                 | ≥0.16                                         | 1641       | 1131           | 509            | 1             |
| JTI             | ≥0.01                                         | 10612      | 7759           | 2851           | 2             |
|                 | ≥0.04                                         | 7212       | 5217           | 1994           | 1             |
|                 | ≥0.09                                         | 3821       | 2676           | 1144           | 1             |
|                 | ≥0.16                                         | 2010       | 1385           | 624            | 1             |

Protein: Protein coding genes; lncRNAs: long non-coding RNAs; miRNAs: microRNAs.

**Supplementary Table 2** Two hundred and forty nine genes located at genomic loci at least 500kb away from any GWAS-identified prostate cancer risk variants

| Gene               | Region  | Classification | R <sup>2a</sup> | OR (95% CI)      | P-value               | P-value after FDR <sup>a</sup> | Closest risk SNPs <sup>b</sup> | Distance to the index SNP (kb) | Model              |
|--------------------|---------|----------------|-----------------|------------------|-----------------------|--------------------------------|--------------------------------|--------------------------------|--------------------|
| <i>AP4B1-ASI</i>   | 1p13.2  | lncRNA         | 0.03            | 0.84 (0.75-0.93) | $1.37 \times 10^{-3}$ | $3.75 \times 10^{-2}$          | rs56391074                     | 26188.54                       | Modified<br>UTMOST |
|                    |         |                | 0.04            | 0.83 (0.75-0.93) | $7.89 \times 10^{-4}$ | $2.49 \times 10^{-2}$          | rs56391074                     | 26188.54                       | JTI                |
| <i>SLC1A7</i>      | 1p32.3  | protein_coding | 0.07            | 1.11 (1.04-1.18) | $1.44 \times 10^{-3}$ | $3.91 \times 10^{-2}$          | rs636291                       | 42996.76                       | JTI                |
| <i>NSUN4</i>       | 1p33    | protein_coding | 0.03            | 0.88 (0.81-0.95) | $7.11 \times 10^{-4}$ | $2.31 \times 10^{-2}$          | rs636291                       | 36249.75                       | JTI                |
| <i>YBX1</i>        | 1p34.2  | protein_coding | 0.02            | 1.16 (1.06-1.27) | $1.16 \times 10^{-3}$ | $3.35 \times 10^{-2}$          | rs636291                       | 32592.00                       | PrediXcan          |
|                    |         |                | 0.03            | 1.16 (1.06-1.26) | $1.27 \times 10^{-3}$ | $3.56 \times 10^{-2}$          | rs636291                       | 32592.00                       | JTI                |
| <i>ZC3H12A</i>     | 1p34.3  | protein_coding | 0.05            | 1.23 (1.12-1.34) | $7.02 \times 10^{-6}$ | $5.33 \times 10^{-4}$          | rs636291                       | 27384.06                       | PrediXcan          |
|                    |         |                | 0.05            | 1.21 (1.09-1.35) | $5.16 \times 10^{-4}$ | $1.81 \times 10^{-2}$          | rs636291                       | 27384.06                       | JTI                |
| <i>DNAL11</i>      | 1p34.3  | protein_coding | 0.06            | 0.95 (0.92-0.98) | $1.59 \times 10^{-3}$ | $4.19 \times 10^{-2}$          | rs636291                       | 27466.42                       | JTI                |
| <i>LINC01137</i>   | 1p34.3  | lncRNA         | 0.11            | 0.94 (0.91-0.97) | $4.78 \times 10^{-4}$ | $1.71 \times 10^{-2}$          | rs636291                       | 27364.38                       | Modified<br>UTMOST |
|                    |         |                | 0.13            | 0.97 (0.95-0.99) | $1.54 \times 10^{-3}$ | $4.09 \times 10^{-2}$          | rs636291                       | 27364.38                       | JTI                |
| <i>FAM76A</i>      | 1p35.3  | protein_coding | 0.07            | 1.36 (1.12-1.65) | $1.79 \times 10^{-3}$ | $4.51 \times 10^{-2}$          | rs636291                       | 17496.39                       | JTI                |
| <b><i>RPA2</i></b> | 1p35.3  | protein_coding | 0.42            | 0.96 (0.94-0.98) | $1.65 \times 10^{-4}$ | $7.47 \times 10^{-3}$          | rs636291                       | 17661.94                       | PrediXcan          |
|                    |         |                | 0.41            | 0.95 (0.92-0.98) | $3.40 \times 10^{-4}$ | $1.34 \times 10^{-2}$          | rs636291                       | 17661.94                       | Modified<br>UTMOST |
|                    |         |                | 0.45            | 0.97 (0.95-0.98) | $3.44 \times 10^{-4}$ | $1.35 \times 10^{-2}$          | rs636291                       | 17661.94                       | JTI                |
| <i>PLA2G2A</i>     | 1p36.13 | protein_coding | 0.14            | 1.59 (1.2-2.11)  | $1.43 \times 10^{-3}$ | $3.89 \times 10^{-2}$          | rs636291                       | 9745.83                        | Modified           |

|                     |        |                |      |                  |                       |                       |            |          |                       |
|---------------------|--------|----------------|------|------------------|-----------------------|-----------------------|------------|----------|-----------------------|
|                     |        |                |      |                  |                       |                       |            |          | UTMOST                |
| <i>VPS45</i>        | 1q21.2 | protein_coding | 0.02 | 1.46 (1.19-1.78) | $2.54 \times 10^{-4}$ | $1.06 \times 10^{-2}$ | rs56391074 | 61828.65 | Modified<br>UTMOST    |
|                     |        |                | 0.03 | 1.42 (1.17-1.71) | $3.36 \times 10^{-4}$ | $1.33 \times 10^{-2}$ | rs56391074 | 61828.65 | JTI                   |
| <i>AC243772.2</i>   | 1q21.2 | lncRNA         | 0.04 | 0.87 (0.82-0.92) | $4.61 \times 10^{-6}$ | $3.84 \times 10^{-4}$ | rs56391074 | 61546.50 | JTI                   |
| <i>ADAMTSL4</i>     | 1q21.3 | protein_coding | 0.04 | 1.17 (1.08-1.28) | $2.46 \times 10^{-4}$ | $1.03 \times 10^{-2}$ | rs56391074 | 62311.17 | Modified<br>UTMOST    |
| <i>AL589765.4</i>   | 1q21.3 | lncRNA         | 0.14 | 1.08 (1.03-1.13) | $9.44 \times 10^{-4}$ | $2.86 \times 10^{-2}$ | rs17599629 | 1077.573 | PrediXcan             |
|                     |        |                | 0.15 | 1.08 (1.03-1.13) | $1.34 \times 10^{-3}$ | $3.70 \times 10^{-2}$ |            |          | JTI                   |
| <i>MRPL9</i>        | 1q21.3 | protein_coding | 0.03 | 0.89 (0.83-0.96) | $1.63 \times 10^{-3}$ | $4.26 \times 10^{-2}$ | rs17599629 | 1073.83  | JTI                   |
| <i>TDRKH-AS1</i>    | 1q21.3 | lncRNA         | 0.03 | 0.87 (0.8-0.94)  | $9.99 \times 10^{-4}$ | $2.97 \times 10^{-2}$ | rs17599629 | 1104.99  | Modified<br>UTMOST    |
| <i>ADAMTSL4-AS1</i> | 1q21.3 | protein_coding | 0.04 | 0.74 (0.66-0.83) | $2.98 \times 10^{-7}$ | $3.39 \times 10^{-5}$ | rs56391074 | 62322.77 | Modified<br>UTMOST    |
|                     |        |                | 0.08 | 0.72 (0.64-0.82) | $7.59 \times 10^{-7}$ | $7.70 \times 10^{-5}$ | rs56391074 | 62322.77 | JTI                   |
| <i>C1orf21</i>      | 1q25.3 | protein_coding | 0.03 | 1.09 (1.05-1.14) | $7.31 \times 10^{-5}$ | $3.96 \times 10^{-3}$ | rs4845695  | 29444.39 | JTI                   |
| <i>TSEN15</i>       | 1q25.3 | protein_coding | 0.08 | 0.92 (0.88-0.97) | $5.87 \times 10^{-4}$ | $2.00 \times 10^{-2}$ | rs4845695  | 29109.01 | JTI                   |
| <i>AL078645.1</i>   | 1q25.3 | lncRNA         | 0.02 | 2.18 (1.58-3)    | $1.87 \times 10^{-6}$ | $1.72 \times 10^{-4}$ | rs4845695  | 29465.67 | Modified<br>UTMOST    |
| <i>AC244034.2</i>   | 1q32.1 | lncRNA         | 0.21 | 0.94 (0.92-0.97) | $4.14 \times 10^{-5}$ | $2.48 \times 10^{-3}$ | rs1775148  | 919.46   | PrediXcan             |
|                     |        |                | 0.19 | 0.94 (0.91-0.98) | $5.44 \times 10^{-4}$ | $1.89 \times 10^{-2}$ | rs1775148  | 919.46   | Modified<br>UTMOST    |
|                     |        |                | 0.22 | 0.96 (0.93-0.98) |                       |                       |            |          | $7.01 \times 10^{-4}$ |
| <i>AL592148.3</i>   | 1q41   | lncRNA         | 0.25 | 1.05 (1.02-1.09) | $1.89 \times 10^{-3}$ | $4.71 \times 10^{-2}$ | rs1775148  | 17074.39 | PrediXcan             |
|                     |        |                | 0.3  | 1.04 (1.02-1.07) | $1.72 \times 10^{-3}$ | $4.41 \times 10^{-2}$ | rs1775148  | 17074.39 | JTI                   |

|                          |         |                |      |                  |                       |                       |            |          |                    |
|--------------------------|---------|----------------|------|------------------|-----------------------|-----------------------|------------|----------|--------------------|
| <b><i>OBSCN-AS1</i></b>  | 1q42.13 | protein_coding | 0.12 | 0.92 (0.88-0.96) | $4.39 \times 10^{-4}$ | $1.60 \times 10^{-2}$ | rs1775148  | 22633.38 | PrediXcan          |
|                          |         |                | 0.15 | 0.94 (0.91-0.97) | $3.97 \times 10^{-4}$ | $1.49 \times 10^{-2}$ | rs1775148  | 22633.38 | Modified<br>UTMOST |
|                          |         |                | 0.16 | 0.94 (0.91-0.98) | $1.18 \times 10^{-3}$ | $3.39 \times 10^{-2}$ | rs1775148  | 22633.38 | JTI                |
| <i>IBA57</i>             | 1q42.13 | protein_coding | 0.04 | 0.88 (0.82-0.95) | $1.74 \times 10^{-3}$ | $4.43 \times 10^{-2}$ | rs1775148  | 22595.69 | JTI                |
| <i>AL353593.1</i>        | 1q42.13 | lncRNA         | 0.02 | 1.67 (1.25-2.24) | $6.51 \times 10^{-4}$ | $2.17 \times 10^{-2}$ | rs1775148  | 22704.46 | JTI                |
| <i>MAT2A</i>             | 2p11.2  | protein_coding | 0.02 | 0.5 (0.39-0.64)  | $8.72 \times 10^{-8}$ | $1.15 \times 10^{-5}$ | rs74702681 | 19113.40 | JTI                |
| <i>CEP68</i>             | 2p14    | protein_coding | 0.03 | 0.85 (0.78-0.93) | $5.10 \times 10^{-4}$ | $1.79 \times 10^{-2}$ | rs58235267 | 2005.66  | Modified<br>UTMOST |
|                          |         |                | 0.04 | 0.95 (0.92-0.98) | $3.82 \times 10^{-4}$ | $1.46 \times 10^{-2}$ | rs58235267 | 2005.66  | JTI                |
| <i>AC009975.1</i>        | 2p16.3  | lncRNA         | 0.21 | 0.95 (0.92-0.98) | $4.04 \times 10^{-4}$ | $1.51 \times 10^{-2}$ | rs7591218  | 5398.48  | PrediXcan          |
| <i>CYP1B1-AS1</i>        | 2p22.2  | lncRNA         | 0.02 | 0.89 (0.83-0.96) | $1.80 \times 10^{-3}$ | $4.51 \times 10^{-2}$ | rs13385191 | 17414.53 | PrediXcan          |
| <i>RMDN2-AS1</i>         | 2p22.2  | lncRNA         | 0.02 | 0.81 (0.71-0.92) | $1.24 \times 10^{-3}$ | $3.50 \times 10^{-2}$ | rs13385191 | 17288.88 | PrediXcan          |
| <i>IFT172</i>            | 2p23.3  | protein_coding | 0.02 | 0.84 (0.76-0.92) | $5.57 \times 10^{-4}$ | $1.93 \times 10^{-2}$ | rs13385191 | 6778.97  | JTI                |
| <i>LINC01376</i>         | 2p24.2  | lncRNA         | 0.03 | 2.54 (1.43-4.51) | $1.53 \times 10^{-3}$ | $4.08 \times 10^{-2}$ | rs9287719  | 8457.00  | JTI                |
| <i>CPSF3</i>             | 2p25.1  | protein_coding | 0.03 | 0.88 (0.82-0.95) | $7.86 \times 10^{-4}$ | $2.48 \times 10^{-2}$ | rs62106670 | 966.57   | JTI                |
| <i>SLC20A1</i>           | 2q13    | protein_coding | 0.07 | 1.23 (1.09-1.39) | $8.29 \times 10^{-4}$ | $2.58 \times 10^{-2}$ | rs11691517 | 1510.34  | Modified<br>UTMOST |
| <b><i>AC079922.2</i></b> | 2q13    | lncRNA         | 0.22 | 0.94 (0.91-0.97) | $3.91 \times 10^{-5}$ | $2.36 \times 10^{-3}$ | rs11691517 | 1506.31  | PrediXcan          |
|                          |         |                | 0.23 | 0.94 (0.92-0.97) | $1.76 \times 10^{-4}$ | $7.83 \times 10^{-3}$ | rs11691517 | 1506.31  | Modified<br>UTMOST |
|                          |         |                | 0.24 | 0.96 (0.94-0.98) | $3.86 \times 10^{-4}$ | $1.47 \times 10^{-2}$ | rs11691517 | 1506.31  | JTI                |
| <b><i>RIF1</i></b>       | 2q23.3  | protein_coding | 0.12 | 1.12 (1.06-1.18) | $8.43 \times 10^{-5}$ | $4.42 \times 10^{-3}$ | rs11691517 | 40373.30 | PrediXcan          |
|                          |         |                | 0.15 | 1.07 (1.03-1.1)  | $5.79 \times 10^{-5}$ | $3.26 \times 10^{-3}$ | rs11691517 | 40373.30 | Modified           |

|                         |        |                |      |                  |                       |                       |            |          |                    |
|-------------------------|--------|----------------|------|------------------|-----------------------|-----------------------|------------|----------|--------------------|
|                         |        |                |      |                  |                       |                       |            |          | UTMOST             |
|                         |        |                | 0.18 | 1.05 (1.03-1.08) | $1.18 \times 10^{-4}$ | $5.80 \times 10^{-3}$ | rs11691517 | 40373.30 | JTI                |
| <i>PDE11A</i>           | 2q31.2 | protein_coding | 0.1  | 0.93 (0.89-0.97) | $1.79 \times 10^{-3}$ | $4.51 \times 10^{-2}$ | rs34925593 | 4253.43  | Modified<br>UTMOST |
| <i>AC007319.1</i>       | 2q32.1 | lncRNA         | 0.02 | 1.13 (1.05-1.22) | $1.35 \times 10^{-3}$ | $3.72 \times 10^{-2}$ | rs34925593 | 13633.40 | Modified<br>UTMOST |
| <i>AC093388.1</i>       | 2q32.2 | lncRNA         | 0.03 | 0.92 (0.88-0.97) | $1.15 \times 10^{-3}$ | $3.32 \times 10^{-2}$ | rs34925593 | 17084.27 | JTI                |
| <b><i>CASP10</i></b>    | 2q33.1 | protein_coding | 0.05 | 0.88 (0.84-0.93) | $6.72 \times 10^{-6}$ | $5.14 \times 10^{-4}$ | rs34925593 | 27813.06 | PrediXcan          |
|                         |        |                | 0.09 | 0.85 (0.8-0.9)   | $1.04 \times 10^{-7}$ | $1.35 \times 10^{-5}$ | rs34925593 | 27813.06 | Modified<br>UTMOST |
|                         |        |                | 0.04 | 0.88 (0.83-0.92) | $5.11 \times 10^{-7}$ | $5.53 \times 10^{-5}$ | rs34925593 | 27813.06 | JTI                |
| <b><i>HDAC4-AS1</i></b> | 2q37.3 | protein_coding | 0.12 | 1.07 (1.03-1.11) | $1.52 \times 10^{-3}$ | $4.07 \times 10^{-2}$ | rs2292884  | 1879.90  | PrediXcan          |
|                         |        |                | 0.21 | 1.06 (1.02-1.09) | $8.30 \times 10^{-4}$ | $2.58 \times 10^{-2}$ | rs2292884  | 1879.90  | Modified<br>UTMOST |
|                         |        |                | 0.21 | 1.06 (1.03-1.1)  | $7.01 \times 10^{-4}$ | $2.28 \times 10^{-2}$ | rs2292884  | 1879.90  | JTI                |
| <i>LIAS</i>             | 4p14   | protein_coding | 0.05 | 1.07 (1.03-1.11) | $3.48 \times 10^{-4}$ | $1.36 \times 10^{-2}$ | rs10009409 | 34394.63 | JTI                |
| <i>SMIM14</i>           | 4p14   | protein_coding | 0.02 | 0.83 (0.76-0.9)  | $7.21 \times 10^{-6}$ | $5.44 \times 10^{-4}$ | rs10009409 | 34307.30 | JTI                |
| <i>MAEA</i>             | 4p16.3 | protein_coding | 0.46 | 1.04 (1.02-1.07) | $1.57 \times 10^{-3}$ | $4.16 \times 10^{-2}$ | rs10009409 | 72571.61 | JTI                |
| <i>UVSSA</i>            | 4p16.3 | protein_coding | 0.35 | 0.96 (0.94-0.99) | $1.82 \times 10^{-3}$ | $4.57 \times 10^{-2}$ | rs10009409 | 72514.20 | Modified<br>UTMOST |
| <i>UNC5C</i>            | 4q22.3 | protein_coding | 0.02 | 0.82 (0.74-0.9)  | $6.52 \times 10^{-5}$ | $3.59 \times 10^{-3}$ | rs17021918 | 520.78   | PrediXcan          |
| <i>CYP2U1</i>           | 4q25   | protein_coding | 0.05 | 1.11 (1.04-1.18) | $9.98 \times 10^{-4}$ | $2.97 \times 10^{-2}$ | rs34480284 | 2787.90  | JTI                |
| <i>AC095055.1</i>       | 4q31.3 | lncRNA         | 0.02 | 0.55 (0.4-0.74)  | $1.30 \times 10^{-4}$ | $6.23 \times 10^{-3}$ | rs34480284 | 45996.52 | Modified<br>UTMOST |
|                         |        |                | 0.05 | 0.83 (0.76-0.9)  | $4.44 \times 10^{-6}$ | $3.71 \times 10^{-4}$ | rs34480284 | 45996.52 | JTI                |

|                          |         |                |      |                  |                       |                       |            |          |                    |
|--------------------------|---------|----------------|------|------------------|-----------------------|-----------------------|------------|----------|--------------------|
| <i>SH3RF1</i>            | 4q32.3  | protein_coding | 0.02 | 0.74 (0.63-0.87) | $3.91 \times 10^{-4}$ | $1.48 \times 10^{-2}$ | rs34480284 | 63950.78 | Modified<br>UTMOST |
| <i>LINC02363</i>         | 4q35.1  | lncRNA         | 0.02 | 1.33 (1.11-1.58) | $1.65 \times 10^{-3}$ | $4.28 \times 10^{-2}$ | rs34480284 | 79197.28 | PrediXcan          |
| <i>AC114956.1</i>        | 5p12    | lncRNA         | 0.04 | 0.91 (0.86-0.96) | $4.19 \times 10^{-4}$ | $1.54 \times 10^{-2}$ | rs2121875  | 850.17   | PrediXcan          |
| <i>GDF9</i>              | 5q31.1  | protein_coding | 0.07 | 1.4 (1.16-1.68)  | $5.44 \times 10^{-4}$ | $1.89 \times 10^{-2}$ | rs10793821 | 1639.34  | JTI                |
| <i>NDST1</i>             | 5q33.1  | protein_coding | 0.06 | 1.15 (1.06-1.24) | $4.20 \times 10^{-4}$ | $1.55 \times 10^{-2}$ | rs10793821 | 16029.17 | Modified<br>UTMOST |
| <i>CUL9</i>              | 6p21.1  | protein_coding | 0.02 | 0.76 (0.65-0.89) | $7.48 \times 10^{-4}$ | $2.40 \times 10^{-2}$ | rs4711748  | 544.69   | JTI                |
| <i>CNPY3</i>             | 6p21.1  | protein_coding | 0.1  | 1.07 (1.03-1.12) | $1.16 \times 10^{-3}$ | $3.35 \times 10^{-2}$ | rs4711748  | 797.66   | PrediXcan          |
| <b><i>AL035587.1</i></b> | 6p21.1  | lncRNA         | 0.07 | 1.13 (1.06-1.2)  | $9.27 \times 10^{-5}$ | $4.73 \times 10^{-3}$ | rs4711748  | 786.50   | PrediXcan          |
|                          |         |                | 0.13 | 1.12 (1.06-1.18) | $8.03 \times 10^{-5}$ | $4.26 \times 10^{-3}$ | rs4711748  | 786.50   | Modified<br>UTMOST |
|                          |         |                | 0.14 | 1.11 (1.05-1.18) | $5.71 \times 10^{-4}$ | $1.95 \times 10^{-2}$ | rs4711748  | 786.50   | JTI                |
| <i>GLO1</i>              | 6p21.2  | protein_coding | 0.1  | 0.92 (0.88-0.97) | $1.60 \times 10^{-3}$ | $4.20 \times 10^{-2}$ | rs9469899  | 3850.58  | Modified<br>UTMOST |
| <i>PIMI</i>              | 6p21.2  | protein_coding | 0.02 | 1.11 (1.04-1.18) | $1.55 \times 10^{-3}$ | $4.11 \times 10^{-2}$ | rs9469899  | 2344.86  | JTI                |
| <i>BAK1</i>              | 6p21.31 | protein_coding | 0.26 | 0.95 (0.92-0.98) | $1.19 \times 10^{-3}$ | $3.41 \times 10^{-2}$ | rs9296068  | 551.63   | PrediXcan          |
|                          |         |                | 0.31 | 0.96 (0.94-0.98) | $7.66 \times 10^{-4}$ | $2.43 \times 10^{-2}$ | rs9296068  | 551.63   | Modified<br>UTMOST |
| <i>PRSS16</i>            | 6p22.1  | protein_coding | 0.09 | 0.91 (0.87-0.96) | $8.37 \times 10^{-5}$ | $4.40 \times 10^{-3}$ | rs7767188  | 2858.30  | PrediXcan          |
|                          |         |                | 0.14 | 0.93 (0.89-0.96) | $1.26 \times 10^{-4}$ | $6.10 \times 10^{-3}$ | rs7767188  | 2858.30  | JTI                |
| <i>LINC02829</i>         | 6p22.1  | lncRNA         | 0.02 | 0.82 (0.74-0.91) | $1.61 \times 10^{-4}$ | $7.40 \times 10^{-3}$ | rs7767188  | 608.49   | JTI                |
| <i>HIST1H3H</i>          | 6p22.1  | protein_coding | 0.04 | 0.91 (0.86-0.96) | $5.67 \times 10^{-4}$ | $1.95 \times 10^{-2}$ | rs7767188  | 2295.93  | PrediXcan          |
| <b><i>HFE</i></b>        | 6p22.2  | protein_coding | 0.06 | 1.11 (1.05-1.17) | $7.91 \times 10^{-5}$ | $4.22 \times 10^{-3}$ | rs7767188  | 3986.27  | PrediXcan          |



|                   |         |                |      |                  |                       |                       |           |          |                    |
|-------------------|---------|----------------|------|------------------|-----------------------|-----------------------|-----------|----------|--------------------|
|                   |         |                | 0.07 | 1.19 (1.09-1.29) | $8.57 \times 10^{-5}$ | $4.48 \times 10^{-3}$ | rs7767188 | 3986.27  | Modified<br>UTMOST |
|                   |         |                | 0.1  | 1.1 (1.05-1.15)  | $1.38 \times 10^{-4}$ | $6.54 \times 10^{-3}$ | rs7767188 | 3986.27  | JTI                |
| <i>ABT1</i>       | 6p22.2  | protein_coding | 0.04 | 0.8 (0.72-0.89)  | $3.36 \times 10^{-5}$ | $2.07 \times 10^{-3}$ | rs7767188 | 3476.60  | JTI                |
| <i>BTN3A2</i>     | 6p22.2  | protein_coding | 0.49 | 1.02 (1.01-1.04) | $1.03 \times 10^{-3}$ | $3.05 \times 10^{-2}$ | rs7767188 | 3708.39  | JTI                |
| <i>F13A1</i>      | 6p25.1  | protein_coding | 0.05 | 1.18 (1.06-1.31) | $1.96 \times 10^{-3}$ | $4.84 \times 10^{-2}$ | rs4713266 | 5074.71  | JTI                |
| <i>RIPK1</i>      | 6p25.2  | protein_coding | 0.18 | 0.93 (0.89-0.97) | $1.80 \times 10^{-3}$ | $4.51 \times 10^{-2}$ | rs4713266 | 8154.81  | Modified<br>UTMOST |
| <i>AL359715.1</i> | 6q14.1  | lncRNA         | 0.07 | 0.91 (0.86-0.96) | $6.13 \times 10^{-4}$ | $2.07 \times 10^{-2}$ | rs9443189 | 4657.18  | Modified<br>UTMOST |
| <i>AL359715.2</i> | 6q14.1  | lncRNA         | 0.02 | 0.84 (0.77-0.93) | $3.02 \times 10^{-4}$ | $1.22 \times 10^{-2}$ | rs9443189 | 4680.79  | Modified<br>UTMOST |
|                   |         |                | 0.03 | 0.76 (0.65-0.89) | $5.22 \times 10^{-4}$ | $1.83 \times 10^{-2}$ | rs9443189 | 4680.79  | JTI                |
| <i>PRSS35</i>     | 6q14.2  | protein_coding | 0.06 | 1.11 (1.04-1.18) | $1.78 \times 10^{-3}$ | $4.50 \times 10^{-2}$ | rs9443189 | 7726.31  | JTI                |
| <i>AL139274.2</i> | 6q14.3  | lncRNA         | 0.03 | 0.88 (0.81-0.94) | $3.86 \times 10^{-4}$ | $1.47 \times 10^{-2}$ | rs9443189 | 11365.00 | Modified<br>UTMOST |
|                   |         |                | 0.05 | 0.9 (0.84-0.96)  | $1.31 \times 10^{-3}$ | $3.63 \times 10^{-2}$ | rs9443189 | 11365.00 | JTI                |
| <i>C6orf163</i>   | 6q15    | protein_coding | 0.11 | 1.1 (1.05-1.16)  | $2.36 \times 10^{-4}$ | $9.92 \times 10^{-3}$ | rs9443189 | 11558.69 | PrediXcan          |
|                   |         |                | 0.1  | 1.07 (1.03-1.11) | $4.40 \times 10^{-4}$ | $1.60 \times 10^{-2}$ | rs9443189 | 11558.69 | Modified<br>UTMOST |
|                   |         |                | 0.15 | 1.05 (1.02-1.08) | $1.28 \times 10^{-3}$ | $3.58 \times 10^{-2}$ | rs9443189 | 11558.69 | JTI                |
| <i>CALHM5</i>     | 6q22.1  | protein_coding | 0.03 | 1.18 (1.08-1.28) | $1.39 \times 10^{-4}$ | $6.56 \times 10^{-3}$ | rs2273669 | 7547.62  | PrediXcan          |
| <i>NCOA7</i>      | 6q22.32 | protein_coding | 0.04 | 0.85 (0.78-0.94) | $9.38 \times 10^{-4}$ | $2.84 \times 10^{-2}$ | rs339331  | 8892.26  | PrediXcan          |
|                   |         |                | 0.02 | 0.86 (0.79-0.94) | $1.38 \times 10^{-3}$ | $3.78 \times 10^{-2}$ | rs339331  | 8892.26  | JTI                |
| <i>L3MBTL3</i>    | 6q23.1  | protein_coding | 0.39 | 0.95 (0.93-0.97) | $3.51 \times 10^{-6}$ | $3.05 \times 10^{-4}$ | rs339331  | 13124.79 | PrediXcan          |

|                   |         |                      |      |                  |                       |                       |             |          |                    |
|-------------------|---------|----------------------|------|------------------|-----------------------|-----------------------|-------------|----------|--------------------|
|                   |         |                      | 0.42 | 0.95 (0.93-0.97) | $2.29 \times 10^{-5}$ | $1.49 \times 10^{-3}$ | rs339331    | 13124.79 | Modified<br>UTMOST |
|                   |         |                      | 0.44 | 0.95 (0.92-0.97) | $2.72 \times 10^{-5}$ | $1.72 \times 10^{-3}$ | rs339331    | 13124.79 | JTI                |
| <i>AC005062.1</i> | 7p21.1  | lncRNA               | 0.02 | 0.89 (0.85-0.94) | $3.06 \times 10^{-6}$ | $2.73 \times 10^{-4}$ | rs527510716 | 18014.07 | PrediXcan          |
| <i>ZNF800</i>     | 7q31.33 | protein_coding       | 0.02 | 0.87 (0.8-0.95)  | $1.58 \times 10^{-3}$ | $4.17 \times 10^{-2}$ | rs6465657   | 29170.52 | PrediXcan          |
| <i>DOCK5</i>      | 8p21.2  | protein_coding       | 0.02 | 0.91 (0.86-0.96) | $7.53 \times 10^{-4}$ | $2.41 \times 10^{-2}$ | rs11135910  | 849.90   | Modified<br>UTMOST |
| <i>EGR3</i>       | 8p21.3  | protein_coding       | 0.02 | 0.84 (0.78-0.91) | $1.23 \times 10^{-5}$ | $8.67 \times 10^{-4}$ | rs2928679   | 893.80   | PrediXcan          |
| <i>AC107959.1</i> | 8p21.3  | lncRNA               | 0.07 | 0.86 (0.8-0.91)  | $1.01 \times 10^{-6}$ | $9.83 \times 10^{-5}$ | rs2928679   | 596.87   | Modified<br>UTMOST |
|                   |         |                      | 0.08 | 0.76 (0.66-0.87) | $8.73 \times 10^{-5}$ | $4.53 \times 10^{-3}$ | rs2928679   | 596.87   | JTI                |
| <i>FAM66A</i>     | 8p23.1  | processed_transcript | 0.25 | 1.06 (1.03-1.1)  | $1.54 \times 10^{-4}$ | $7.14 \times 10^{-3}$ | rs2928679   | 11219.45 | PrediXcan          |
|                   |         |                      | 0.3  | 1.08 (1.04-1.11) | $6.22 \times 10^{-5}$ | $3.47 \times 10^{-3}$ | rs2928679   | 11219.45 | Modified<br>UTMOST |
| <i>AC130352.1</i> | 8p23.1  | lncRNA               | 0.04 | 1.16 (1.06-1.27) | $1.17 \times 10^{-3}$ | $3.35 \times 10^{-2}$ | rs2928679   | 11105.00 | Modified<br>UTMOST |
| <i>CHMP4C</i>     | 8q21.13 | protein_coding       | 0.29 | 0.96 (0.94-0.98) | $1.12 \times 10^{-3}$ | $3.25 \times 10^{-2}$ | rs6984769   | 56734.51 | PrediXcan          |
|                   |         |                      | 0.29 | 0.94 (0.91-0.97) | $8.38 \times 10^{-4}$ | $2.60 \times 10^{-2}$ | rs6984769   | 56734.51 | Modified<br>UTMOST |
|                   |         |                      | 0.31 | 0.96 (0.94-0.98) | $9.86 \times 10^{-4}$ | $2.95 \times 10^{-2}$ | rs6984769   | 56734.51 | JTI                |
| <i>LRRC69</i>     | 8q21.3  | protein_coding       | 0.04 | 1.11 (1.05-1.17) | $1.88 \times 10^{-4}$ | $8.24 \times 10^{-3}$ | rs6984769   | 66203.90 | PrediXcan          |
|                   |         |                      | 0.07 | 1.15 (1.07-1.23) | $6.75 \times 10^{-5}$ | $3.71 \times 10^{-3}$ | rs6984769   | 66203.90 | Modified<br>UTMOST |
|                   |         |                      | 0.08 | 1.1 (1.04-1.17)  | $1.04 \times 10^{-3}$ | $3.06 \times 10^{-2}$ | rs6984769   | 66203.90 | JTI                |
| <i>COL22A1</i>    | 8q24.3  | protein_coding       | 0.03 | 0.91 (0.85-0.96) | $1.15 \times 10^{-3}$ | $3.32 \times 10^{-2}$ | rs7837688   | 11061.12 | PrediXcan          |

|                   |         |                |      |                  |                       |                       |            |          |                    |
|-------------------|---------|----------------|------|------------------|-----------------------|-----------------------|------------|----------|--------------------|
|                   |         |                | 0.13 | 0.87 (0.8-0.94)  | $9.75 \times 10^{-4}$ | $2.93 \times 10^{-2}$ | rs7837688  | 11061.12 | Modified<br>UTMOST |
| <i>THEM6</i>      | 8q24.3  | protein_coding | 0.05 | 1.09 (1.04-1.15) | $6.68 \times 10^{-4}$ | $2.20 \times 10^{-2}$ | rs7837688  | 15269.26 | PrediXcan          |
| <i>AC105219.4</i> | 8q24.3  | lncRNA         | 0.02 | 0.75 (0.64-0.89) | $7.45 \times 10^{-4}$ | $2.39 \times 10^{-2}$ | rs7837688  | 16300.96 | Modified<br>UTMOST |
| <i>IL11RA</i>     | 9p13.3  | protein_coding | 0.13 | 1.17 (1.07-1.29) | $1.21 \times 10^{-3}$ | $3.43 \times 10^{-2}$ | rs10122495 | 600.92   | JTI                |
| <i>CD72</i>       | 9p13.3  | protein_coding | 0.04 | 1.18 (1.07-1.32) | $1.83 \times 10^{-3}$ | $4.57 \times 10^{-2}$ | rs10122495 | 1559.75  | PrediXcan          |
|                   |         |                | 0.08 | 1.13 (1.06-1.2)  | $1.46 \times 10^{-4}$ | $6.84 \times 10^{-3}$ | rs10122495 | 1559.75  | Modified<br>UTMOST |
| <i>UNC13B</i>     | 9p13.3  | protein_coding | 0.06 | 1.13 (1.07-1.19) | $5.71 \times 10^{-6}$ | $4.51 \times 10^{-4}$ | rs10122495 | 1112.22  | JTI                |
| <i>AL357874.2</i> | 9p13.3  | lncRNA         | 0.09 | 0.9 (0.84-0.96)  | $1.46 \times 10^{-3}$ | $3.94 \times 10^{-2}$ | rs10122495 | 1592.73  | PrediXcan          |
|                   |         |                | 0.08 | 0.9 (0.86-0.96)  | $4.35 \times 10^{-4}$ | $1.59 \times 10^{-2}$ | rs10122495 | 1592.73  | Modified<br>UTMOST |
|                   |         |                | 0.13 | 0.9 (0.85-0.95)  | $3.53 \times 10^{-4}$ | $1.37 \times 10^{-2}$ | rs10122495 | 1592.73  | JTI                |
| <i>TXN</i>        | 9q31.3  | protein_coding | 0.14 | 1.24 (1.1-1.4)   | $3.73 \times 10^{-4}$ | $1.44 \times 10^{-2}$ | rs817826   | 2849.79  | JTI                |
| <i>AL138895.1</i> | 9q32    | lncRNA         | 0.02 | 0.16 (0.05-0.48) | $1.29 \times 10^{-3}$ | $3.58 \times 10^{-2}$ | rs817826   | 7002.70  | JTI                |
| <i>TRAF1</i>      | 9q33.2  | protein_coding | 0.02 | 1.13 (1.05-1.22) | $1.65 \times 10^{-3}$ | $4.28 \times 10^{-2}$ | rs1571801  | 762.70   | Modified<br>UTMOST |
| <i>NEK6</i>       | 9q33.3  | protein_coding | 0.13 | 0.88 (0.83-0.94) | $1.03 \times 10^{-4}$ | $5.10 \times 10^{-3}$ | rs1571801  | 2592.51  | Modified<br>UTMOST |
|                   |         |                | 0.14 | 0.89 (0.83-0.96) | $1.43 \times 10^{-3}$ | $3.89 \times 10^{-2}$ | rs1571801  | 2592.51  | JTI                |
| <i>ODF2</i>       | 9q34.11 | protein_coding | 0.03 | 0.83 (0.75-0.93) | $1.67 \times 10^{-3}$ | $4.32 \times 10^{-2}$ | rs1182     | 1358.60  | Modified<br>UTMOST |
| <i>CFAP157</i>    | 9q34.11 | protein_coding | 0.06 | 1.1 (1.04-1.15)  | $5.35 \times 10^{-4}$ | $1.86 \times 10^{-2}$ | rs1182     | 2106.79  | PrediXcan          |
|                   |         |                | 0.05 | 1.66 (1.34-2.05) | $3.73 \times 10^{-6}$ | $3.21 \times 10^{-4}$ | rs1182     | 2106.79  | Modified           |

|                          |          |                |      |                  |                       |                       |             |          |                    |
|--------------------------|----------|----------------|------|------------------|-----------------------|-----------------------|-------------|----------|--------------------|
|                          |          |                |      |                  |                       |                       |             |          | UTMOST             |
|                          |          |                | 0.02 | 1.11 (1.05-1.17) | $3.84 \times 10^{-4}$ | $1.46 \times 10^{-2}$ | rs1182      | 2106.79  | JTI                |
| <b><i>PTRH1</i></b>      | 9q34.11  | protein_coding | 0.19 | 1.13 (1.07-1.18) | $2.35 \times 10^{-6}$ | $2.13 \times 10^{-4}$ | rs1182      | 2120.80  | PrediXcan          |
|                          |          |                | 0.21 | 1.09 (1.05-1.12) | $6.98 \times 10^{-7}$ | $7.19 \times 10^{-5}$ | rs1182      | 2120.80  | Modified<br>UTMOST |
|                          |          |                | 0.24 | 1.09 (1.05-1.13) | $1.02 \times 10^{-5}$ | $7.45 \times 10^{-4}$ | rs1182      | 2120.80  | JTI                |
|                          |          |                |      |                  |                       |                       |             |          |                    |
| <b><i>BRD3</i></b>       | 9q34.2   | protein_coding | 0.04 | 1.12 (1.04-1.2)  | $1.84 \times 10^{-3}$ | $4.60 \times 10^{-2}$ | rs1182      | 4319.37  | PrediXcan          |
| <b><i>PIP4K2A</i></b>    | 10p12.2  | protein_coding | 0.05 | 1.09 (1.03-1.16) | $1.80 \times 10^{-3}$ | $4.52 \times 10^{-2}$ | rs141536087 | 21969.09 | Modified<br>UTMOST |
| <b><i>NUDT5</i></b>      | 10p13    | protein_coding | 0.02 | 0.84 (0.77-0.92) | $6.38 \times 10^{-5}$ | $3.54 \times 10^{-3}$ | rs141536087 | 11352.63 | Modified<br>UTMOST |
|                          |          |                | 0.04 | 0.88 (0.83-0.93) | $1.37 \times 10^{-5}$ | $9.49 \times 10^{-4}$ | rs141536087 | 11352.63 | JTI                |
| <b><i>SEC61A2</i></b>    | 10p13    | protein_coding | 0.03 | 0.83 (0.76-0.91) | $7.97 \times 10^{-5}$ | $4.25 \times 10^{-3}$ | rs141536087 | 11316.95 | PrediXcan          |
|                          |          |                | 0.09 | 0.92 (0.88-0.96) | $1.80 \times 10^{-4}$ | $7.96 \times 10^{-3}$ | rs141536087 | 11316.95 | Modified<br>UTMOST |
|                          |          |                | 0.06 | 0.88 (0.82-0.95) | $4.02 \times 10^{-4}$ | $1.50 \times 10^{-2}$ | rs141536087 | 11316.95 | JTI                |
| <b><i>GDI2</i></b>       | 10p15.1  | protein_coding | 0.22 | 0.95 (0.91-0.98) | $1.72 \times 10^{-3}$ | $4.41 \times 10^{-2}$ | rs141536087 | 4952.50  | Modified<br>UTMOST |
|                          |          |                | 0.24 | 0.96 (0.93-0.98) | $1.97 \times 10^{-3}$ | $4.86 \times 10^{-2}$ | rs141536087 | 4952.50  | JTI                |
| <b><i>TASOR2</i></b>     | 10p15.1  | protein_coding | 0.03 | 3.85 (2.06-7.19) | $2.61 \times 10^{-5}$ | $1.67 \times 10^{-3}$ | rs141536087 | 4872.11  | JTI                |
| <b><i>ZNF22</i></b>      | 10q11.21 | protein_coding | 0.02 | 1.14 (1.07-1.21) | $2.59 \times 10^{-5}$ | $1.67 \times 10^{-3}$ | rs76934034  | 587.06   | JTI                |
| <b><i>FRMPD2</i></b>     | 10q11.22 | protein_coding | 0.02 | 1.28 (1.11-1.48) | $8.65 \times 10^{-4}$ | $2.66 \times 10^{-2}$ | rs3123078   | 2160.37  | PrediXcan          |
| <b><i>FO681492.1</i></b> | 10q11.22 | protein_coding | 0.12 | 2.32 (1.65-3.27) | $1.64 \times 10^{-6}$ | $1.53 \times 10^{-4}$ | rs76934034  | 875.67   | Modified<br>UTMOST |
| <b><i>SIRT1</i></b>      | 10q21.3  | protein_coding | 0.04 | 0.92 (0.88-0.97) | $1.78 \times 10^{-3}$ | $4.51 \times 10^{-2}$ | rs10993994  | 18094.93 | JTI                |

|                        |          |                |      |                  |                       |                       |            |          |                    |
|------------------------|----------|----------------|------|------------------|-----------------------|-----------------------|------------|----------|--------------------|
| <i>HKDC1</i>           | 10q22.1  | protein_coding | 0.11 | 0.89 (0.84-0.94) | $4.76 \times 10^{-5}$ | $2.76 \times 10^{-3}$ | rs10993994 | 19430.56 | JTI                |
| <b><i>PLAC9</i></b>    | 10q22.3  | protein_coding | 0.11 | 0.94 (0.91-0.97) | $2.01 \times 10^{-5}$ | $1.33 \times 10^{-3}$ | rs1935581  | 8303.71  | PrediXcan          |
|                        |          |                | 0.17 | 0.91 (0.87-0.94) | $8.48 \times 10^{-7}$ | $8.46 \times 10^{-5}$ | rs1935581  | 8303.71  | Modified<br>UTMOST |
|                        |          |                | 0.22 | 0.94 (0.91-0.97) | $1.35 \times 10^{-5}$ | $9.40 \times 10^{-4}$ | rs1935581  | 8303.71  | JTI                |
| <b><i>MARVELD1</i></b> | 10q24.2  | protein_coding | 0.15 | 1.07 (1.03-1.12) | $2.76 \times 10^{-4}$ | $1.13 \times 10^{-2}$ | rs1935581  | 9277.78  | PrediXcan          |
|                        |          |                | 0.19 | 1.07 (1.03-1.11) | $1.61 \times 10^{-4}$ | $7.40 \times 10^{-3}$ | rs1935581  | 9277.78  | Modified<br>UTMOST |
|                        |          |                | 0.21 | 1.13 (1.06-1.21) | $3.21 \times 10^{-4}$ | $1.28 \times 10^{-2}$ | rs1935581  | 9277.78  | JTI                |
| <i>NPM3</i>            | 10q24.32 | protein_coding | 0.05 | 0.91 (0.86-0.96) | $1.19 \times 10^{-3}$ | $3.41 \times 10^{-2}$ | rs3850699  | 873.14   | PrediXcan          |
| <i>GSTO2</i>           | 10q25.1  | protein_coding | 0.12 | 1.08 (1.03-1.13) | $1.51 \times 10^{-3}$ | $4.05 \times 10^{-2}$ | rs34032774 | 1613.54  | PrediXcan          |
|                        |          |                | 0.09 | 1.21 (1.09-1.35) | $3.80 \times 10^{-4}$ | $1.46 \times 10^{-2}$ | rs34032774 | 1613.54  | JTI                |
| <i>AL731566.2</i>      | 10q26.13 | lncRNA         | 0.05 | 0.89 (0.83-0.95) | $5.60 \times 10^{-4}$ | $1.93 \times 10^{-2}$ | rs11199874 | 692.76   | Modified<br>UTMOST |
|                        |          |                | 0.08 | 0.92 (0.87-0.96) | $3.49 \times 10^{-4}$ | $1.36 \times 10^{-2}$ | rs11199874 | 692.76   | JTI                |
| <i>SYT13</i>           | 11p11.2  | protein_coding | 0.06 | 1.19 (1.09-1.3)  | $9.90 \times 10^{-5}$ | $4.96 \times 10^{-3}$ | rs59111863 | 2160.11  | Modified<br>UTMOST |
|                        |          |                | 0.06 | 1.18 (1.07-1.31) | $1.50 \times 10^{-3}$ | $4.04 \times 10^{-2}$ | rs59111863 | 2160.11  | JTI                |
| <i>MDK</i>             | 11p11.2  | protein_coding | 0.03 | 1.15 (1.06-1.26) | $1.62 \times 10^{-3}$ | $4.24 \times 10^{-2}$ | rs59111863 | 1019.66  | PrediXcan          |
| <i>WT1</i>             | 11p13    | protein_coding | 0.02 | 1.12 (1.04-1.2)  | $1.45 \times 10^{-3}$ | $3.92 \times 10^{-2}$ | rs12791447 | 24852.74 | JTI                |
| <i>LINC00958</i>       | 11p15.2  | lncRNA         | 0.18 | 0.94 (0.91-0.98) | $1.79 \times 10^{-3}$ | $4.51 \times 10^{-2}$ | rs12791447 | 5427.48  | PrediXcan          |
| <i>AP001160.3</i>      | 11q12.3  | lncRNA         | 0.04 | 0.82 (0.75-0.88) | $4.28 \times 10^{-7}$ | $4.67 \times 10^{-5}$ | rs2277283  | 645.06   | JTI                |
| <b><i>SF3B2</i></b>    | 11q13.1  | protein_coding | 0.24 | 0.96 (0.93-0.98) | $6.66 \times 10^{-4}$ | $2.20 \times 10^{-2}$ | rs12785905 | 1133.77  | PrediXcan          |
|                        |          |                | 0.27 | 0.95 (0.92-0.98) | $3.57 \times 10^{-4}$ | $1.38 \times 10^{-2}$ | rs12785905 | 1133.77  | Modified           |

|                       |          |                |      |                                |                       |                       |            |          |                    |
|-----------------------|----------|----------------|------|--------------------------------|-----------------------|-----------------------|------------|----------|--------------------|
|                       |          |                |      |                                |                       |                       |            |          | UTMOST             |
|                       |          |                | 0.29 | 0.95 (0.92-0.97)               | $3.98 \times 10^{-4}$ | $1.49 \times 10^{-2}$ | rs12785905 | 1133.77  | JTI                |
| <i>SPINDOC</i>        | 11q13.1  | protein_coding | 0.1  | 1.07 (1.03-1.11)               | $8.62 \times 10^{-4}$ | $2.66 \times 10^{-2}$ | rs2277283  | 1672.42  | PrediXcan          |
| <b><i>MAP3K11</i></b> | 11q13.1  | protein_coding | 0.18 | 0.94 (0.91-0.98)               | $8.32 \times 10^{-4}$ | $2.59 \times 10^{-2}$ | rs2277283  | 3456.79  | PrediXcan          |
|                       |          |                | 0.2  | 0.95 (0.92-0.98)               | $4.13 \times 10^{-4}$ | $1.54 \times 10^{-2}$ | rs2277283  | 3456.79  | Modified<br>UTMOST |
|                       |          |                | 0.25 | 0.96 (0.94-0.98)               | $1.74 \times 10^{-3}$ | $4.43 \times 10^{-2}$ | rs2277283  | 3456.79  | JTI                |
| <i>TRPC6</i>          | 11q22.1  | protein_coding | 0.02 | 1.44 (1.2-1.71)                | $6.50 \times 10^{-5}$ | $3.59 \times 10^{-3}$ | rs11568818 | 1079.37  | JTI                |
| <i>C11orf1</i>        | 11q23.1  | protein_coding | 0.04 | 0.86 (0.8-0.93)                | $8.96 \times 10^{-5}$ | $4.61 \times 10^{-3}$ | rs11214775 | 2057.52  | Modified<br>UTMOST |
|                       |          |                | 0.06 | 0.91 (0.87-0.96)               | $4.17 \times 10^{-4}$ | $1.54 \times 10^{-2}$ | rs11214775 | 2057.52  | JTI                |
| <i>FDXACB1</i>        | 11q23.1  | protein_coding | 0.06 | 0.85 (0.79-0.91)               | $1.09 \times 10^{-5}$ | $7.89 \times 10^{-4}$ | rs11214775 | 2062.40  | Modified<br>UTMOST |
|                       |          |                | 0.07 | 0.87 (0.81-0.94)               | $1.96 \times 10^{-4}$ | $8.47 \times 10^{-3}$ | rs11214775 | 2062.40  | JTI                |
| <i>NTM</i>            | 11q25    | protein_coding | 0.04 | 0.86 (0.79-0.93)               | $1.76 \times 10^{-4}$ | $7.83 \times 10^{-3}$ | rs878987   | 3026.00  | PrediXcan          |
|                       |          |                | 0.1  | 0.9 (0.85-0.95)                | $1.85 \times 10^{-4}$ | $8.13 \times 10^{-3}$ | rs878987   | 3026.00  | Modified<br>UTMOST |
|                       |          |                | 0.06 | 0.68 (0.55-0.84)               | $3.18 \times 10^{-4}$ | $1.27 \times 10^{-2}$ | rs878987   | 3026.00  | JTI                |
| <i>AC092747.4</i>     | 12p11.23 | lncRNA         | 0.06 | 1.09 (1.05-1.13)               | $2.35 \times 10^{-5}$ | $1.52 \times 10^{-3}$ | rs10845938 | 12773.12 | Modified<br>UTMOST |
| <i>SOX5</i>           | 12p12.1  | protein_coding | 0.08 | 7.53 (2.31 <sup>-24</sup> .57) | $8.64 \times 10^{-4}$ | $2.66 \times 10^{-2}$ | rs10845938 | 9265.52  | JTI                |
| <i>FAM66C</i>         | 12p13.31 | lncRNA         | 0.05 | 1.1 (1.04-1.16)                | $1.09 \times 10^{-3}$ | $3.18 \times 10^{-2}$ | rs2066827  | 4538.29  | JTI                |
| <i>CSRNP2</i>         | 12q13.12 | protein_coding | 0.02 | 1.18 (1.07-1.29)               | $7.60 \times 10^{-4}$ | $2.42 \times 10^{-2}$ | rs902774   | 1818.91  | Modified<br>UTMOST |
| <i>CERS5</i>          | 12q13.12 | protein_coding | 0.07 | 0.92 (0.87-0.96)               | $7.61 \times 10^{-4}$ | $2.42 \times 10^{-2}$ | rs10875943 | 847.57   | PrediXcan          |

|                   |          |                      |      |                  |                       |                       |            |          |                    |
|-------------------|----------|----------------------|------|------------------|-----------------------|-----------------------|------------|----------|--------------------|
| <i>AQP5</i>       | 12q13.12 | protein_coding       | 0.02 | 1.1 (1.04-1.17)  | $4.84 \times 10^{-4}$ | $1.73 \times 10^{-2}$ | rs10875943 | 679.64   | PrediXcan          |
| <i>BCDIN3D</i>    | 12q13.12 | protein_coding       | 0.09 | 0.93 (0.9-0.96)  | $5.55 \times 10^{-5}$ | $3.15 \times 10^{-3}$ | rs10875943 | 555.56   | PrediXcan          |
|                   |          |                      | 0.09 | 0.92 (0.89-0.96) | $2.68 \times 10^{-5}$ | $1.71 \times 10^{-3}$ | rs10875943 | 555.56   | JTI                |
| <i>AC074032.1</i> | 12q13.12 | processed_transcript | 0.14 | 0.93 (0.89-0.97) | $1.15 \times 10^{-3}$ | $3.32 \times 10^{-2}$ | rs10875943 | 829.97   | PrediXcan          |
|                   |          |                      | 0.17 | 0.95 (0.92-0.98) | $1.03 \times 10^{-3}$ | $3.05 \times 10^{-2}$ | rs10875943 | 829.97   | Modified<br>UTMOST |
|                   |          |                      | 0.19 | 0.95 (0.92-0.98) | $1.49 \times 10^{-3}$ | $4.03 \times 10^{-2}$ | rs10875943 | 829.97   | JTI                |
| <i>DCN</i>        | 12q21.33 | protein_coding       | 0.04 | 0.67 (0.53-0.86) | $1.27 \times 10^{-3}$ | $3.57 \times 10^{-2}$ | rs5799921  | 1378.50  | JTI                |
| <i>WASHC3</i>     | 12q23.2  | protein_coding       | 0.11 | 0.91 (0.86-0.96) | $2.23 \times 10^{-4}$ | $9.47 \times 10^{-3}$ | rs5799921  | 12246.18 | PrediXcan          |
|                   |          |                      | 0.13 | 0.93 (0.89-0.96) | $8.00 \times 10^{-5}$ | $4.25 \times 10^{-3}$ | rs5799921  | 12246.18 | Modified<br>UTMOST |
|                   |          |                      | 0.15 | 0.93 (0.89-0.96) | $1.11 \times 10^{-4}$ | $5.48 \times 10^{-3}$ | rs5799921  | 12246.18 | JTI                |
| <i>KCTD10</i>     | 12q24.11 | protein_coding       | 0.07 | 1.15 (1.08-1.23) | $1.18 \times 10^{-5}$ | $8.44 \times 10^{-4}$ | rs10774740 | 4779.74  | PrediXcan          |
|                   |          |                      | 0.11 | 1.08 (1.04-1.12) | $1.99 \times 10^{-4}$ | $8.55 \times 10^{-3}$ | rs10774740 | 4779.74  | Modified<br>UTMOST |
| <i>ATP2A2</i>     | 12q24.11 | protein_coding       | 0.03 | 0.87 (0.8-0.95)  | $1.28 \times 10^{-3}$ | $3.57 \times 10^{-2}$ | rs10774740 | 3947.64  | JTI                |
| <i>PEBP1</i>      | 12q24.23 | protein_coding       | 0.1  | 0.92 (0.88-0.97) | $1.54 \times 10^{-3}$ | $4.10 \times 10^{-2}$ | rs61933115 | 3489.60  | JTI                |
| <i>SUDS3</i>      | 12q24.23 | protein_coding       | 0.05 | 0.82 (0.72-0.93) | $1.72 \times 10^{-3}$ | $4.41 \times 10^{-2}$ | rs61933115 | 3730.13  | JTI                |
| <i>AC069234.5</i> | 12q24.31 | lncRNA               | 0.02 | 0.87 (0.8-0.95)  | $1.92 \times 10^{-3}$ | $4.75 \times 10^{-2}$ | rs61933115 | 6057.61  | PrediXcan          |
| <i>AL137244.1</i> | 13q22.2  | lncRNA               | 0.08 | 1.07 (1.03-1.11) | $8.27 \times 10^{-4}$ | $2.58 \times 10^{-2}$ | rs9600079  | 2477.27  | PrediXcan          |
|                   |          |                      | 0.11 | 1.12 (1.06-1.19) | $1.63 \times 10^{-4}$ | $7.42 \times 10^{-3}$ | rs9600079  | 2477.27  | Modified<br>UTMOST |
|                   |          |                      | 0.1  | 1.08 (1.03-1.13) | $7.42 \times 10^{-4}$ | $2.39 \times 10^{-2}$ | rs9600079  | 2477.27  | JTI                |
| <i>LMO7-AS1</i>   | 13q22.2  | lncRNA               | 0.36 | 1.04 (1.02-1.06) | $3.88 \times 10^{-4}$ | $1.47 \times 10^{-2}$ | rs9600079  | 2450.70  | PrediXcan          |

|                          |          |                |      |                  |                       |                       |            |          |                    |
|--------------------------|----------|----------------|------|------------------|-----------------------|-----------------------|------------|----------|--------------------|
|                          |          |                | 0.41 | 1.04 (1.02-1.07) | $1.26 \times 10^{-4}$ | $6.10 \times 10^{-3}$ | rs9600079  | 2450.70  | Modified<br>UTMOST |
|                          |          |                | 0.42 | 1.04 (1.02-1.06) | $1.72 \times 10^{-4}$ | $7.68 \times 10^{-3}$ | rs9600079  | 2450.70  | JTI                |
| <i>NOVA1</i>             | 14q12    | protein_coding | 0.02 | 0.78 (0.68-0.9)  | $6.62 \times 10^{-4}$ | $2.19 \times 10^{-2}$ | rs1004030  | 3606.65  | PrediXcan          |
| <i>SLC25A21-AS1</i>      | 14q13.3  | protein_coding | 0.04 | 1.12 (1.05-1.19) | $2.56 \times 10^{-4}$ | $1.06 \times 10^{-2}$ | rs11629412 | 502.80   | Modified<br>UTMOST |
|                          |          |                | 0.07 | 1.11 (1.05-1.17) | $3.39 \times 10^{-4}$ | $1.33 \times 10^{-2}$ | rs11629412 | 502.80   | JTI                |
| <b><i>AL121790.2</i></b> | 14q21.1  | lncRNA         | 0.07 | 0.89 (0.84-0.94) | $6.99 \times 10^{-5}$ | $3.82 \times 10^{-3}$ | rs11629412 | 887.07   | PrediXcan          |
|                          |          |                | 0.12 | 0.92 (0.87-0.97) | $1.03 \times 10^{-3}$ | $3.05 \times 10^{-2}$ | rs11629412 | 887.07   | Modified<br>UTMOST |
|                          |          |                | 0.12 | 0.93 (0.89-0.97) | $1.50 \times 10^{-3}$ | $4.03 \times 10^{-2}$ | rs11629412 | 887.07   | JTI                |
| <i>AL606834.2</i>        | 14q22.1  | lncRNA         | 0.06 | 0.92 (0.87-0.97) | $1.24 \times 10^{-3}$ | $3.50 \times 10^{-2}$ | rs8008270  | 2181.00  | JTI                |
| <i>POMT2</i>             | 14q24.3  | protein_coding | 0.04 | 0.9 (0.85-0.96)  | $2.01 \times 10^{-3}$ | $4.94 \times 10^{-2}$ | rs8014671  | 6649.04  | PrediXcan          |
| <i>RPS6KL1</i>           | 14q24.3  | protein_coding | 0.07 | 1.08 (1.03-1.13) | $4.01 \times 10^{-4}$ | $1.50 \times 10^{-2}$ | rs8014671  | 4278.40  | Modified<br>UTMOST |
|                          |          |                | 0.1  | 1.07 (1.03-1.12) | $7.80 \times 10^{-4}$ | $2.47 \times 10^{-2}$ | rs8014671  | 4278.40  | JTI                |
| <i>ZNF839</i>            | 14q32.31 | protein_coding | 0.03 | 1.14 (1.05-1.23) | $1.28 \times 10^{-3}$ | $3.57 \times 10^{-2}$ | rs8014671  | 31691.46 | Modified<br>UTMOST |
| <i>PPP1R13B</i>          | 14q32.33 | protein_coding | 0.07 | 0.86 (0.78-0.94) | $1.21 \times 10^{-3}$ | $3.43 \times 10^{-2}$ | rs8014671  | 33107.83 | Modified<br>UTMOST |
| <i>SIVAI</i>             | 14q32.33 | protein_coding | 0.06 | 0.93 (0.89-0.97) | $1.67 \times 10^{-3}$ | $4.32 \times 10^{-2}$ | rs8014671  | 34127.18 | JTI                |
| <i>AL132712.1</i>        | 14q32.33 | lncRNA         | 0.03 | 0.89 (0.82-0.96) | $1.91 \times 10^{-3}$ | $4.75 \times 10^{-2}$ | rs8014671  | 33228.45 | JTI                |
| <i>FMNI</i>              | 15q13.3  | protein_coding | 0.02 | 0.85 (0.8-0.91)  | $3.17 \times 10^{-6}$ | $2.80 \times 10^{-4}$ | rs4924487  | 7865.17  | Modified<br>UTMOST |
| <i>MYO5C</i>             | 15q21.2  | protein_coding | 0.1  | 1.12 (1.05-1.2)  | $4.02 \times 10^{-4}$ | $1.50 \times 10^{-2}$ | rs33984059 | 3901.35  | JTI                |



|                   |         |                |      |                  |                       |                       |             |          |                    |
|-------------------|---------|----------------|------|------------------|-----------------------|-----------------------|-------------|----------|--------------------|
| <i>SPPL2A</i>     | 15q21.2 | protein_coding | 0.05 | 0.92 (0.88-0.97) | $5.99 \times 10^{-4}$ | $2.03 \times 10^{-2}$ | rs4775302   | 4359.70  | Modified           |
|                   |         |                | 0.08 | 0.95 (0.93-0.98) | $1.34 \times 10^{-3}$ | $3.70 \times 10^{-2}$ | rs4775302   | 4359.70  | JTI                |
| <i>ISLR2</i>      | 15q24.1 | protein_coding | 0.11 | 1.12 (1.04-1.2)  | $1.34 \times 10^{-3}$ | $3.70 \times 10^{-2}$ | rs112293876 | 7628.01  | Modified<br>UTMOST |
| <i>FAM219B</i>    | 15q24.1 | protein_coding | 0.02 | 1.31 (1.11-1.55) | $1.83 \times 10^{-3}$ | $4.58 \times 10^{-2}$ | rs112293876 | 8427.69  | Modified<br>UTMOST |
| <i>MPI</i>        | 15q24.1 | protein_coding | 0.05 | 1.1 (1.04-1.16)  | $5.21 \times 10^{-4}$ | $1.83 \times 10^{-2}$ | rs112293876 | 8417.71  | Modified<br>UTMOST |
| <i>AC010931.2</i> | 15q24.1 | protein_coding | 0.05 | 1.12 (1.05-1.21) | $1.15 \times 10^{-3}$ | $3.32 \times 10^{-2}$ | rs112293876 | 7653.62  | PrediXcan          |
|                   |         |                | 0.08 | 1.12 (1.04-1.21) | $1.67 \times 10^{-3}$ | $4.32 \times 10^{-2}$ | rs112293876 | 7653.62  | Modified<br>UTMOST |
| <i>RPP25</i>      | 15q24.2 | protein_coding | 0.04 | 0.91 (0.86-0.96) | $9.66 \times 10^{-4}$ | $2.91 \times 10^{-2}$ | rs112293876 | 8482.12  | Modified<br>UTMOST |
|                   |         |                | 0.05 | 0.95 (0.92-0.98) | $1.67 \times 10^{-3}$ | $4.32 \times 10^{-2}$ | rs112293876 | 8482.12  | JTI                |
| <i>FURIN</i>      | 15q26.1 | protein_coding | 0.03 | 0.77 (0.65-0.9)  | $1.61 \times 10^{-3}$ | $4.23 \times 10^{-2}$ | rs112293876 | 24647.18 | Modified<br>UTMOST |
|                   |         |                | 0.03 | 0.73 (0.6-0.88)  | $8.25 \times 10^{-4}$ | $2.58 \times 10^{-2}$ | rs112293876 | 24647.18 | JTI                |
| <i>FES</i>        | 15q26.1 | protein_coding | 0.06 | 1.13 (1.05-1.22) | $1.41 \times 10^{-3}$ | $3.84 \times 10^{-2}$ | rs112293876 | 24662.28 | Modified<br>UTMOST |
| <i>PRC1-AS1</i>   | 15q26.1 | lncRNA         | 0.06 | 1.16 (1.06-1.26) | $1.45 \times 10^{-3}$ | $3.93 \times 10^{-2}$ | rs112293876 | 24744.93 | JTI                |
| <i>AC118658.1</i> | 15q26.3 | lncRNA         | 0.02 | 0.79 (0.7-0.89)  | $1.71 \times 10^{-4}$ | $7.65 \times 10^{-3}$ | rs112293876 | 32438.80 | JTI                |
| <i>MAPK3</i>      | 16p11.2 | protein_coding | 0.03 | 1.12 (1.05-1.19) | $2.43 \times 10^{-4}$ | $1.02 \times 10^{-2}$ | rs11863709  | 27529.15 | Modified<br>UTMOST |
| <i>GDPD3</i>      | 16p11.2 | protein_coding | 0.09 | 1.09 (1.04-1.14) | $4.95 \times 10^{-4}$ | $1.75 \times 10^{-2}$ | rs11863709  | 27538.45 | Modified           |

|                |          |                |      |                  |                       |                       |            |          |                    |
|----------------|----------|----------------|------|------------------|-----------------------|-----------------------|------------|----------|--------------------|
|                |          |                |      |                  |                       |                       |            |          | UTMOST             |
| <i>XPO6</i>    | 16p11.2  | protein_coding | 0.02 | 1.22 (1.1-1.37)  | $3.33 \times 10^{-4}$ | $1.32 \times 10^{-2}$ | rs11863709 | 29545.28 | Modified<br>UTMOST |
|                |          |                | 0.03 | 1.12 (1.05-1.19) | $8.83 \times 10^{-4}$ | $2.71 \times 10^{-2}$ | rs11863709 | 29545.28 | JTI                |
| <i>NPIPA1</i>  | 16p13.11 | protein_coding | 0.39 | 0.96 (0.94-0.98) | $8.93 \times 10^{-4}$ | $2.73 \times 10^{-2}$ | rs11863709 | 42637.92 | PrediXcan          |
|                |          |                | 0.44 | 0.96 (0.93-0.98) | $2.01 \times 10^{-3}$ | $4.94 \times 10^{-2}$ | rs11863709 | 42637.92 | Modified<br>UTMOST |
| <i>NPIPA5</i>  | 16p13.11 | protein_coding | 0.46 | 1.06 (1.02-1.09) | $1.72 \times 10^{-3}$ | $4.41 \times 10^{-2}$ | rs11863709 | 42197.06 | Modified<br>UTMOST |
| <i>HAGH</i>    | 16p13.3  | protein_coding | 0.15 | 0.93 (0.89-0.97) | $4.45 \times 10^{-4}$ | $1.61 \times 10^{-2}$ | rs11863709 | 55808.96 | PrediXcan          |
|                |          |                | 0.16 | 0.94 (0.9-0.97)  | $2.73 \times 10^{-4}$ | $1.12 \times 10^{-2}$ | rs11863709 | 55808.96 | Modified<br>UTMOST |
|                |          |                | 0.17 | 0.96 (0.93-0.98) | $1.23 \times 10^{-3}$ | $3.47 \times 10^{-2}$ | rs11863709 | 55808.96 | JTI                |
| <i>NUBP2</i>   | 16p13.3  | protein_coding | 0.02 | 1.13 (1.06-1.21) | $2.75 \times 10^{-4}$ | $1.13 \times 10^{-2}$ | rs11863709 | 55821.67 | Modified<br>UTMOST |
| <i>TELO2</i>   | 16p13.3  | protein_coding | 0.21 | 1.07 (1.03-1.12) | $9.05 \times 10^{-4}$ | $2.76 \times 10^{-2}$ | rs11863709 | 56111.23 | PrediXcan          |
|                |          |                | 0.28 | 1.05 (1.02-1.09) | $1.04 \times 10^{-3}$ | $3.06 \times 10^{-2}$ | rs11863709 | 56111.23 | Modified<br>UTMOST |
| <i>HMOX2</i>   | 16p13.3  | protein_coding | 0.12 | 1.1 (1.06-1.16)  | $1.92 \times 10^{-5}$ | $1.27 \times 10^{-3}$ | rs11863709 | 53129.89 | PrediXcan          |
| <i>TMEM204</i> | 16p13.3  | protein_coding | 0.11 | 0.9 (0.85-0.96)  | $8.98 \times 10^{-4}$ | $2.75 \times 10^{-2}$ | rs11863709 | 56075.89 | Modified<br>UTMOST |
|                |          |                | 0.12 | 0.88 (0.82-0.95) | $7.32 \times 10^{-4}$ | $2.36 \times 10^{-2}$ | rs11863709 | 56075.89 | JTI                |
| <i>FLYWCH2</i> | 16p13.3  | protein_coding | 0.03 | 1.25 (1.12-1.4)  | $9.99 \times 10^{-5}$ | $4.99 \times 10^{-3}$ | rs11863709 | 54721.39 | Modified<br>UTMOST |
|                |          |                | 0.03 | 1.14 (1.07-1.22) | $8.95 \times 10^{-5}$ | $4.61 \times 10^{-3}$ | rs11863709 | 54721.39 | JTI                |

|                   |         |                |      |                  |                       |                       |             |          |                    |
|-------------------|---------|----------------|------|------------------|-----------------------|-----------------------|-------------|----------|--------------------|
| <i>NLRC3</i>      | 16p13.3 | protein_coding | 0.27 | 0.96 (0.94-0.99) | $1.74 \times 10^{-3}$ | $4.43 \times 10^{-2}$ | rs11863709  | 54065.54 | JTI                |
| <i>EME2</i>       | 16p13.3 | protein_coding | 0.04 | 0.9 (0.84-0.95)  | $3.34 \times 10^{-4}$ | $1.32 \times 10^{-2}$ | rs11863709  | 55831.37 | Modified<br>UTMOST |
|                   |         |                | 0.06 | 0.9 (0.85-0.95)  | $2.30 \times 10^{-4}$ | $9.71 \times 10^{-3}$ | rs11863709  | 55831.37 | JTI                |
| <i>NFATC3</i>     | 16q22.1 | protein_coding | 0.08 | 1.07 (1.03-1.12) | $8.37 \times 10^{-4}$ | $2.60 \times 10^{-2}$ | rs12051443  | 3572.68  | Modified<br>UTMOST |
| <i>ZDHHC7</i>     | 16q24.1 | protein_coding | 0.14 | 0.9 (0.86-0.94)  | $7.00 \times 10^{-7}$ | $7.19 \times 10^{-5}$ | rs199737822 | 2828.89  | PrediXcan          |
|                   |         |                | 0.18 | 0.91 (0.88-0.94) | $1.23 \times 10^{-7}$ | $1.55 \times 10^{-5}$ | rs199737822 | 2828.89  | Modified<br>UTMOST |
|                   |         |                | 0.21 | 0.9 (0.86-0.94)  | $1.25 \times 10^{-6}$ | $1.20 \times 10^{-4}$ | rs199737822 | 2828.89  | JTI                |
| <i>AC134312.1</i> | 16q24.2 | lncRNA         | 0.06 | 0.9 (0.84-0.95)  | $5.42 \times 10^{-4}$ | $1.88 \times 10^{-2}$ | rs199737822 | 5942.75  | PrediXcan          |
|                   |         |                | 0.15 | 0.85 (0.79-0.93) | $1.29 \times 10^{-4}$ | $6.22 \times 10^{-3}$ | rs199737822 | 5942.75  | Modified<br>UTMOST |
|                   |         |                | 0.16 | 0.74 (0.63-0.88) | $6.42 \times 10^{-4}$ | $2.15 \times 10^{-2}$ | rs199737822 | 5942.75  | JTI                |
| <i>ATPAF2</i>     | 17p11.2 | protein_coding | 0.02 | 1.16 (1.07-1.25) | $2.23 \times 10^{-4}$ | $9.47 \times 10^{-3}$ | rs142444269 | 12218.03 | PrediXcan          |
|                   |         |                | 0.09 | 1.14 (1.06-1.23) | $6.55 \times 10^{-4}$ | $2.18 \times 10^{-2}$ | rs142444269 | 12218.03 | Modified<br>UTMOST |
| <i>DRC3</i>       | 17p11.2 | protein_coding | 0.09 | 1.07 (1.03-1.11) | $8.44 \times 10^{-4}$ | $2.62 \times 10^{-2}$ | rs142444269 | 12222.62 | PrediXcan          |
|                   |         |                | 0.12 | 1.17 (1.08-1.26) | $1.90 \times 10^{-4}$ | $8.27 \times 10^{-3}$ | rs142444269 | 12222.62 | Modified<br>UTMOST |
| <i>TOMIL2</i>     | 17p11.2 | protein_coding | 0.03 | 0.89 (0.85-0.94) | $3.09 \times 10^{-5}$ | $1.92 \times 10^{-3}$ | rs142444269 | 12351.92 | JTI                |
| <i>AC122129.1</i> | 17p11.2 | lncRNA         | 0.05 | 0.82 (0.75-0.9)  | $4.51 \times 10^{-5}$ | $2.66 \times 10^{-3}$ | rs142444269 | 12337.21 | Modified<br>UTMOST |
|                   |         |                | 0.06 | 0.88 (0.84-0.94) | $2.50 \times 10^{-5}$ | $1.62 \times 10^{-3}$ | rs142444269 | 12337.21 | JTI                |
| <i>MED31</i>      | 17p13.1 | protein_coding | 0.03 | 0.93 (0.89-0.97) | $5.00 \times 10^{-4}$ | $1.76 \times 10^{-2}$ | rs28441558  | 1256.48  | PrediXcan          |

|                   |          |                |      |                  |                       |                       |             |          |                    |
|-------------------|----------|----------------|------|------------------|-----------------------|-----------------------|-------------|----------|--------------------|
| <i>SMYD4</i>      | 17p13.3  | protein_coding | 0.12 | 0.92 (0.88-0.96) | $4.34 \times 10^{-4}$ | $1.59 \times 10^{-2}$ | rs461251    | 1063.62  | PrediXcan          |
| <i>FBXL20</i>     | 17q12    | protein_coding | 0.09 | 0.91 (0.85-0.96) | $1.72 \times 10^{-3}$ | $4.41 \times 10^{-2}$ | rs11263763  | 1311.82  | Modified<br>UTMOST |
| <i>MAPT</i>       | 17q21.31 | protein_coding | 0.11 | 1.08 (1.03-1.13) | $1.24 \times 10^{-3}$ | $3.50 \times 10^{-2}$ | rs138213197 | 2833.96  | Modified<br>UTMOST |
| <i>CDC27</i>      | 17q21.32 | protein_coding | 0.07 | 0.84 (0.76-0.93) | $8.23 \times 10^{-4}$ | $2.58 \times 10^{-2}$ | rs138213197 | 1610.64  | JTI                |
| <i>LRRC46</i>     | 17q21.32 | protein_coding | 0.22 | 1.07 (1.03-1.11) | $9.15 \times 10^{-4}$ | $2.78 \times 10^{-2}$ | rs138213197 | 896.71   | JTI                |
| <i>ITGB3</i>      | 17q21.32 | protein_coding | 0.03 | 1.18 (1.08-1.29) | $3.02 \times 10^{-4}$ | $1.22 \times 10^{-2}$ | rs138213197 | 1474.49  | Modified<br>UTMOST |
| <i>AC099850.1</i> | 17q22    | lncRNA         | 0.03 | 1.18 (1.07-1.31) | $1.34 \times 10^{-3}$ | $3.70 \times 10^{-2}$ | rs2680708   | 727.84   | PrediXcan          |
| <i>AC015845.2</i> | 17q22    | lncRNA         | 0.02 | 0.83 (0.74-0.93) | $1.51 \times 10^{-3}$ | $4.05 \times 10^{-2}$ | rs2680708   | 606.81   | JTI                |
| <i>DCAF7</i>      | 17q23.3  | protein_coding | 0.02 | 0.88 (0.82-0.94) | $1.51 \times 10^{-4}$ | $7.05 \times 10^{-3}$ | rs2680708   | 5171.70  | PrediXcan          |
| <i>SLC25A19</i>   | 17q25.1  | protein_coding | 0.02 | 0.7 (0.57-0.87)  | $9.99 \times 10^{-4}$ | $2.97 \times 10^{-2}$ | rs6501436   | 4149.78  | JTI                |
| <i>MIF4GD</i>     | 17q25.1  | protein_coding | 0.11 | 0.83 (0.75-0.92) | $4.86 \times 10^{-4}$ | $1.73 \times 10^{-2}$ | rs6501436   | 4143.02  | Modified<br>UTMOST |
| <i>AC022211.2</i> | 17q25.1  | lncRNA         | 0.04 | 0.91 (0.86-0.96) | $1.57 \times 10^{-3}$ | $4.16 \times 10^{-2}$ | rs6501436   | 4148.16  | Modified<br>UTMOST |
| <i>AC132938.1</i> | 17q25.3  | lncRNA         | 0.1  | 0.9 (0.86-0.95)  | $1.94 \times 10^{-4}$ | $8.44 \times 10^{-3}$ | rs6501436   | 11219.70 | JTI                |
| <i>AC009704.2</i> | 18q22.3  | lncRNA         | 0.04 | 1.15 (1.06-1.25) | $5.38 \times 10^{-4}$ | $1.87 \times 10^{-2}$ | rs10460109  | 864.16   | PrediXcan          |
|                   |          |                | 0.04 | 1.13 (1.06-1.22) | $6.30 \times 10^{-4}$ | $2.11 \times 10^{-2}$ | rs10460109  | 864.16   | JTI                |
| <i>ZNF236</i>     | 18q23    | protein_coding | 0.04 | 0.86 (0.8-0.92)  | $6.64 \times 10^{-6}$ | $5.09 \times 10^{-4}$ | rs10460109  | 1498.40  | Modified<br>UTMOST |
|                   |          |                | 0.04 | 0.81 (0.73-0.88) | $5.96 \times 10^{-6}$ | $4.63 \times 10^{-4}$ | rs10460109  | 1498.40  | JTI                |
| <i>AC018529.1</i> | 18q23    | lncRNA         | 0.08 | 0.91 (0.88-0.95) | $6.24 \times 10^{-6}$ | $4.80 \times 10^{-4}$ | rs10460109  | 1768.88  | PrediXcan          |
| <i>IL12RB1</i>    | 19p13.11 | protein_coding | 0.04 | 0.9 (0.84-0.96)  | $1.04 \times 10^{-3}$ | $3.06 \times 10^{-2}$ | rs11666569  | 955.73   | Modified           |

|                      |          |                |      |                  |                       |                       |            |          |                    |
|----------------------|----------|----------------|------|------------------|-----------------------|-----------------------|------------|----------|--------------------|
|                      |          |                |      |                  |                       |                       |            |          | UTMOST             |
|                      |          |                | 0.03 | 0.8 (0.69-0.92)  | $1.64 \times 10^{-3}$ | $4.28 \times 10^{-2}$ | rs11666569 | 955.73   | JTI                |
| <i>MAU2</i>          | 19p13.11 | protein_coding | 0.03 | 0.83 (0.73-0.93) | $1.70 \times 10^{-3}$ | $4.37 \times 10^{-2}$ | rs11666569 | 2217.42  | Modified<br>UTMOST |
| <i>TM6SF2</i>        | 19p13.11 | protein_coding | 0.06 | 0.86 (0.79-0.94) | $6.97 \times 10^{-4}$ | $2.28 \times 10^{-2}$ | rs11666569 | 2161.10  | Modified<br>UTMOST |
| <i>TNPO2</i>         | 19p13.2  | protein_coding | 0.05 | 0.9 (0.84-0.96)  | $1.53 \times 10^{-3}$ | $4.08 \times 10^{-2}$ | rs11666569 | 4404.07  | Modified<br>UTMOST |
| <i>PRDX2</i>         | 19p13.2  | protein_coding | 0.08 | 0.76 (0.64-0.9)  | $1.36 \times 10^{-3}$ | $3.75 \times 10^{-2}$ | rs11666569 | 4306.44  | JTI                |
| <i>PLIN3</i>         | 19p13.3  | protein_coding | 0.03 | 0.88 (0.82-0.94) | $3.50 \times 10^{-4}$ | $1.36 \times 10^{-2}$ | rs11666569 | 12375.72 | PrediXcan          |
| <i>AC022148.1</i>    | 19q13.12 | lncRNA         | 0.04 | 1.8 (1.38-2.36)  | $1.69 \times 10^{-5}$ | $1.14 \times 10^{-3}$ | rs8102476  | 699.241  | Modified<br>UTMOST |
|                      |          |                | 0.04 | 1.81 (1.39-2.36) | $1.23 \times 10^{-5}$ | $8.67 \times 10^{-4}$ |            |          | JTI                |
| <b><i>ZBTB32</i></b> | 19q13.12 | protein_coding | 0.04 | 0.84 (0.77-0.92) | $1.76 \times 10^{-4}$ | $7.83 \times 10^{-3}$ | rs8102476  | 2540.18  | PrediXcan          |
|                      |          |                | 0.1  | 0.91 (0.88-0.95) | $2.16 \times 10^{-5}$ | $1.42 \times 10^{-3}$ | rs8102476  | 2540.18  | Modified<br>UTMOST |
|                      |          |                | 0.1  | 0.93 (0.9-0.96)  | $8.53 \times 10^{-5}$ | $4.47 \times 10^{-3}$ | rs8102476  | 2540.18  | JTI                |
| <i>CLIP3</i>         | 19q13.12 | protein_coding | 0.04 | 0.91 (0.86-0.96) | $5.60 \times 10^{-4}$ | $1.93 \times 10^{-2}$ | rs8102476  | 2230.05  | PrediXcan          |
| <b><i>ETV2</i></b>   | 19q13.12 | protein_coding | 0.03 | 0.82 (0.74-0.9)  | $4.67 \times 10^{-5}$ | $2.73 \times 10^{-3}$ | rs8102476  | 2602.97  | PrediXcan          |
|                      |          |                | 0.08 | 0.89 (0.84-0.93) | $6.93 \times 10^{-6}$ | $5.28 \times 10^{-4}$ | rs8102476  | 2602.97  | Modified<br>UTMOST |
|                      |          |                | 0.1  | 0.84 (0.78-0.9)  | $5.01 \times 10^{-6}$ | $4.09 \times 10^{-4}$ | rs8102476  | 2602.97  | JTI                |
| <b><i>COX6B1</i></b> | 19q13.12 | protein_coding | 0.06 | 1.14 (1.07-1.21) | $2.86 \times 10^{-5}$ | $1.79 \times 10^{-3}$ | rs8102476  | 2596.49  | PrediXcan          |
|                      |          |                | 0.14 | 1.08 (1.04-1.12) | $1.27 \times 10^{-5}$ | $8.92 \times 10^{-4}$ | rs8102476  | 2596.49  | Modified<br>UTMOST |

|                   |          |                |      |                  |                       |                       |            |         |                    |
|-------------------|----------|----------------|------|------------------|-----------------------|-----------------------|------------|---------|--------------------|
|                   |          |                | 0.15 | 1.08 (1.04-1.12) | $4.42 \times 10^{-5}$ | $2.61 \times 10^{-3}$ | rs8102476  | 2596.49 | JTI                |
| <i>PROSER3</i>    | 19q13.12 | protein_coding | 0.13 | 1.12 (1.06-1.19) | $6.05 \times 10^{-5}$ | $3.39 \times 10^{-3}$ | rs8102476  | 2486.57 | PrediXcan          |
|                   |          |                | 0.15 | 1.07 (1.03-1.11) | $1.66 \times 10^{-4}$ | $7.51 \times 10^{-3}$ | rs8102476  | 2486.57 | Modified<br>UTMOST |
| <i>ZNF875</i>     | 19q13.12 | protein_coding | 0.04 | 1.13 (1.07-1.2)  | $2.72 \times 10^{-5}$ | $1.72 \times 10^{-3}$ | rs8102476  | 931.87  | JTI                |
| <i>LINC01535</i>  | 19q13.12 | lncRNA         | 0.49 | 0.96 (0.94-0.99) | $1.62 \times 10^{-3}$ | $4.24 \times 10^{-2}$ | rs8102476  | 992.80  | Modified<br>UTMOST |
|                   |          |                | 0.53 | 0.97 (0.96-0.99) | $1.58 \times 10^{-3}$ | $4.17 \times 10^{-2}$ | rs8102476  | 992.80  | JTI                |
| <i>ZNF260</i>     | 19q13.12 | protein_coding | 0.12 | 0.93 (0.89-0.97) | $1.89 \times 10^{-3}$ | $4.71 \times 10^{-2}$ | rs8102476  | 1734.02 | JTI                |
| <i>ZNF793-AS1</i> | 19q13.12 | lncRNA         | 0.02 | 0.89 (0.83-0.96) | $1.73 \times 10^{-3}$ | $4.42 \times 10^{-2}$ | rs8102476  | 747.55  | Modified<br>UTMOST |
| <i>KMT2B</i>      | 19q13.12 | protein_coding | 0.04 | 0.81 (0.73-0.9)  | $6.20 \times 10^{-5}$ | $3.46 \times 10^{-3}$ | rs8102476  | 2526.69 | Modified<br>UTMOST |
|                   |          |                | 0.05 | 0.85 (0.78-0.93) | $1.82 \times 10^{-4}$ | $8.00 \times 10^{-3}$ | rs8102476  | 2526.69 | JTI                |
| <i>MED29</i>      | 19q13.2  | protein_coding | 0.02 | 0.85 (0.78-0.94) | $1.10 \times 10^{-3}$ | $3.20 \times 10^{-2}$ | rs12610267 | 1137.21 | PrediXcan          |
| <i>VASP</i>       | 19q13.32 | protein_coding | 0.02 | 0.85 (0.77-0.93) | $6.05 \times 10^{-4}$ | $2.05 \times 10^{-2}$ | rs61088131 | 3308.89 | JTI                |
| <i>BCAM</i>       | 19q13.32 | protein_coding | 0.05 | 1.17 (1.07-1.27) | $3.77 \times 10^{-4}$ | $1.45 \times 10^{-2}$ | rs61088131 | 2611.38 | JTI                |
| <i>PRRG2</i>      | 19q13.33 | protein_coding | 0.03 | 1.98 (1.48-2.65) | $4.40 \times 10^{-6}$ | $3.69 \times 10^{-4}$ | rs2659124  | 1270.69 | Modified<br>UTMOST |
| <i>PRR12</i>      | 19q13.33 | protein_coding | 0.16 | 1.08 (1.04-1.12) | $1.10 \times 10^{-4}$ | $5.43 \times 10^{-3}$ | rs2659124  | 1259.70 | Modified<br>UTMOST |
|                   |          |                | 0.21 | 1.05 (1.02-1.08) | $5.95 \times 10^{-4}$ | $2.02 \times 10^{-2}$ | rs2659124  | 1259.70 | JTI                |
| <i>SIGLEC5</i>    | 19q13.41 | protein_coding | 0.08 | 0.93 (0.89-0.97) | $2.45 \times 10^{-4}$ | $1.03 \times 10^{-2}$ | rs2735839  | 750.16  | PrediXcan          |
| <i>PYGB</i>       | 20p11.21 | protein_coding | 0.07 | 1.12 (1.06-1.18) | $9.42 \times 10^{-5}$ | $4.79 \times 10^{-3}$ | rs11480453 | 6118.81 | PrediXcan          |
|                   |          |                | 0.08 | 1.11 (1.04-1.17) | $5.69 \times 10^{-4}$ | $1.95 \times 10^{-2}$ | rs11480453 | 6118.81 | Modified           |

|                   |          |                |      |                  |                       |                       |            |          |                    |
|-------------------|----------|----------------|------|------------------|-----------------------|-----------------------|------------|----------|--------------------|
|                   |          |                |      |                  |                       |                       |            |          | UTMOST             |
|                   |          |                | 0.11 | 1.08 (1.03-1.14) | $1.13 \times 10^{-3}$ | $3.28 \times 10^{-2}$ | rs11480453 | 6118.81  | JTI                |
| <i>ABHD12</i>     | 20p11.21 | protein_coding | 0.06 | 0.89 (0.85-0.94) | $7.26 \times 10^{-5}$ | $3.95 \times 10^{-3}$ | rs11480453 | 6072.13  | Modified<br>UTMOST |
|                   |          |                | 0.06 | 0.9 (0.85-0.95)  | $8.33 \times 10^{-5}$ | $4.40 \times 10^{-3}$ | rs11480453 | 6072.13  | JTI                |
| <i>NINL</i>       | 20p11.21 | protein_coding | 0.08 | 1.1 (1.05-1.15)  | $1.59 \times 10^{-5}$ | $1.08 \times 10^{-3}$ | rs11480453 | 5914.17  | PrediXcan          |
|                   |          |                | 0.08 | 1.11 (1.06-1.16) | $1.37 \times 10^{-5}$ | $9.49 \times 10^{-4}$ | rs11480453 | 5914.17  | Modified<br>UTMOST |
|                   |          |                | 0.13 | 1.08 (1.04-1.11) | $5.39 \times 10^{-6}$ | $4.31 \times 10^{-4}$ | rs11480453 | 5914.17  | JTI                |
| <i>ENTPD6</i>     | 20p11.21 | protein_coding | 0.17 | 0.97 (0.99-0.96) | $1.80 \times 10^{-4}$ | $7.95 \times 10^{-3}$ | rs11480453 | 6171.18  | Modified<br>UTMOST |
| <i>AL121772.1</i> | 20p11.21 | lncRNA         | 0.07 | 1.07 (1.03-1.11) | $3.48 \times 10^{-4}$ | $1.36 \times 10^{-2}$ | rs11480453 | 6127.87  | PrediXcan          |
|                   |          |                | 0.19 | 1.08 (1.04-1.12) | $9.81 \times 10^{-5}$ | $4.94 \times 10^{-3}$ | rs11480453 | 6127.87  | Modified<br>UTMOST |
| <i>AL121772.3</i> | 20p11.21 | lncRNA         | 0.02 | 1.25 (1.11-1.41) | $2.57 \times 10^{-4}$ | $1.07 \times 10^{-2}$ | rs11480453 | 6081.96  | Modified<br>UTMOST |
| <i>AL035252.3</i> | 20p11.21 | lncRNA         | 0.04 | 0.83 (0.75-0.92) | $5.64 \times 10^{-4}$ | $1.94 \times 10^{-2}$ | rs11480453 | 6137.73  | PrediXcan          |
|                   |          |                | 0.05 | 0.86 (0.79-0.93) | $2.78 \times 10^{-4}$ | $1.14 \times 10^{-2}$ | rs11480453 | 6137.73  | Modified<br>UTMOST |
|                   |          |                | 0.1  | 0.89 (0.83-0.95) | $7.43 \times 10^{-4}$ | $2.39 \times 10^{-2}$ | rs11480453 | 6137.73  | JTI                |
| <i>AL158042.1</i> | 20p12.2  | lncRNA         | 0.02 | 1.14 (1.06-1.22) | $3.19 \times 10^{-4}$ | $1.27 \times 10^{-2}$ | rs11480453 | 20365.56 | Modified<br>UTMOST |
|                   |          |                | 0.05 | 1.23 (1.11-1.36) | $1.33 \times 10^{-4}$ | $6.39 \times 10^{-3}$ | rs11480453 | 20365.56 | JTI                |
| <i>FOXS1</i>      | 20q11.21 | protein_coding | 0.02 | 0.88 (0.81-0.95) | $7.72 \times 10^{-4}$ | $2.44 \times 10^{-2}$ | rs11480453 | 915.41   | PrediXcan          |
| <i>MYH7B</i>      | 20q11.22 | protein_coding | 0.02 | 0.92 (0.88-0.97) | $1.59 \times 10^{-3}$ | $4.19 \times 10^{-2}$ | rs11480453 | 2215.69  | JTI                |

|                   |          |                |      |                  |                       |                       |            |          |                    |
|-------------------|----------|----------------|------|------------------|-----------------------|-----------------------|------------|----------|--------------------|
| <b>FAM83C</b>     | 20q11.22 | protein_coding | 0.09 | 1.11 (1.06-1.16) | $1.10 \times 10^{-5}$ | $7.94 \times 10^{-4}$ | rs11480453 | 2526.02  | PrediXcan          |
|                   |          |                | 0.13 | 1.13 (1.07-1.2)  | $2.08 \times 10^{-5}$ | $1.37 \times 10^{-3}$ | rs11480453 | 2526.02  | Modified<br>UTMOST |
|                   |          |                | 0.14 | 1.08 (1.04-1.12) | $4.59 \times 10^{-5}$ | $2.69 \times 10^{-3}$ | rs11480453 | 2526.02  | JTI                |
| <b>RPRD1B</b>     | 20q11.23 | protein_coding | 0.04 | 0.89 (0.83-0.95) | $1.27 \times 10^{-3}$ | $3.56 \times 10^{-2}$ | rs11480453 | 5314.44  | JTI                |
| <b>DNTTIP1</b>    | 20q13.12 | protein_coding | 0.18 | 1.07 (1.03-1.1)  | $3.38 \times 10^{-4}$ | $1.33 \times 10^{-2}$ | rs12480328 | 5107.35  | PrediXcan          |
|                   |          |                | 0.22 | 1.05 (1.02-1.08) | $3.03 \times 10^{-4}$ | $1.22 \times 10^{-2}$ | rs12480328 | 5107.35  | Modified<br>UTMOST |
|                   |          |                | 0.24 | 1.05 (1.02-1.08) | $4.19 \times 10^{-4}$ | $1.54 \times 10^{-2}$ | rs12480328 | 5107.35  | JTI                |
| <b>SNX21</b>      | 20q13.12 | protein_coding | 0.04 | 1.1 (1.04-1.16)  | $1.53 \times 10^{-3}$ | $4.08 \times 10^{-2}$ | rs12480328 | 5065.47  | Modified<br>UTMOST |
| <b>WFDC3</b>      | 20q13.12 | protein_coding | 0.52 | 1.03 (1.01-1.04) | $7.98 \times 10^{-4}$ | $2.51 \times 10^{-2}$ | rs12480328 | 5151.34  | PrediXcan          |
|                   |          |                | 0.46 | 1.05 (1.02-1.07) | $2.82 \times 10^{-4}$ | $1.14 \times 10^{-2}$ | rs12480328 | 5151.34  | Modified<br>UTMOST |
|                   |          |                | 0.53 | 1.03 (1.01-1.05) | $6.54 \times 10^{-4}$ | $2.18 \times 10^{-2}$ | rs12480328 | 5151.34  | JTI                |
| <b>WFDC10B</b>    | 20q13.12 | protein_coding | 0.26 | 0.95 (0.93-0.98) | $3.18 \times 10^{-4}$ | $1.27 \times 10^{-2}$ | rs12480328 | 5214.63  | PrediXcan          |
|                   |          |                | 0.31 | 0.94 (0.92-0.97) | $2.08 \times 10^{-4}$ | $8.93 \times 10^{-3}$ | rs12480328 | 5214.63  | Modified<br>UTMOST |
|                   |          |                | 0.33 | 0.95 (0.92-0.98) | $3.22 \times 10^{-4}$ | $1.28 \times 10^{-2}$ | rs12480328 | 5214.63  | JTI                |
| <b>SLC17A9</b>    | 20q13.33 | protein_coding | 0.02 | 0.89 (0.83-0.95) | $3.87 \times 10^{-4}$ | $1.47 \times 10^{-2}$ | rs2427345  | 568.44   | PrediXcan          |
| <b>GRIK1-AS1</b>  | 21q21.3  | lncRNA         | 0.03 | 1.16 (1.06-1.28) | $1.69 \times 10^{-3}$ | $4.36 \times 10^{-2}$ | rs1041449  | 11780.93 | PrediXcan          |
| <b>AP001042.1</b> | 21q22.2  | lncRNA         | 0.03 | 1.23 (1.12-1.36) | $2.74 \times 10^{-5}$ | $1.73 \times 10^{-3}$ | rs1041449  | 2652.21  | Modified<br>UTMOST |
| <b>AGPAT3</b>     | 21q22.3  | protein_coding | 0.03 | 0.93 (0.89-0.97) | $6.71 \times 10^{-4}$ | $2.21 \times 10^{-2}$ | rs1041449  | 2383.65  | PrediXcan          |
|                   |          |                | 0.03 | 0.62 (0.48-0.79) | $1.39 \times 10^{-4}$ | $6.57 \times 10^{-3}$ | rs1041449  | 2383.65  | Modified           |



|                   |         |                |      |                  |                       |                       |           |         | UTMOST             |
|-------------------|---------|----------------|------|------------------|-----------------------|-----------------------|-----------|---------|--------------------|
|                   |         |                | 0.05 | 0.86 (0.81-0.91) | $2.11 \times 10^{-7}$ | $2.56 \times 10^{-5}$ | rs1041449 | 2383.65 | JTI                |
| <i>ICOSLG</i>     | 21q22.3 | protein_coding | 0.25 | 1.04 (1.01-1.06) | $1.04 \times 10^{-3}$ | $3.06 \times 10^{-2}$ | rs1041449 | 2741.45 | JTI                |
| <i>FP565260.3</i> | 21q22.3 | protein_coding | 0.17 | 0.94 (0.9-0.98)  | $1.91 \times 10^{-3}$ | $4.75 \times 10^{-2}$ | rs1041449 | 2741.46 | Modified<br>UTMOST |
| <i>DUSP18</i>     | 22q12.2 | protein_coding | 0.04 | 1.14 (1.07-1.21) | $2.24 \times 10^{-5}$ | $1.46 \times 10^{-3}$ | rs9625483 | 2159.10 | PrediXcan          |
|                   |         |                | 0.04 | 1.1 (1.04-1.17)  | $5.84 \times 10^{-4}$ | $1.99 \times 10^{-2}$ | rs9625483 | 2159.10 | Modified<br>UTMOST |
| <i>LGALS2</i>     | 22q13.1 | protein_coding | 0.09 | 1.14 (1.06-1.22) | $7.35 \times 10^{-4}$ | $2.37 \times 10^{-2}$ | rs9625483 | 9077.32 | PrediXcan          |
|                   |         |                | 0.11 | 1.06 (1.03-1.09) | $4.24 \times 10^{-4}$ | $1.56 \times 10^{-2}$ | rs9625483 | 9077.32 | JTI                |

Bold genes represent those supported by all three genetic prediction models (PrediXcan, modified UTMOST and JTI).

<sup>a</sup> R<sup>2</sup>: prediction performance (R<sup>2</sup>) derived using GTEx data. *P* value: derived from association analyses of 79,194 cases and 61,112 controls; associations with FDR-corrected *P* value  $\leq 0.05$  considered significant;

<sup>b</sup> Risk SNPs identified in previous GWAS or fine-mapping studies. The risk SNP closest to the gene is presented.

lncRNA: long noncoding RNAs.

**Supplementary Table 3** One hundred and ninety four novel genes located at known susceptibility loci that have not yet been reported

| Gene             | Region  | Classification | R <sup>2a</sup> | OR (95% CI)      | P-value               | P-value after FDR <sup>a</sup> | Closest risk SNPs <sup>b</sup> | Distance to the index SNP (kb) | Model              |
|------------------|---------|----------------|-----------------|------------------|-----------------------|--------------------------------|--------------------------------|--------------------------------|--------------------|
| <i>NTRK1</i>     | 1q23.1  | protein_coding | 0.02            | 0.76 (0.66-0.88) | $3.35 \times 10^{-4}$ | $1.32 \times 10^{-2}$          | rs80237341                     | 1.22                           | JTI                |
| <i>SH2D2A</i>    | 1q23.1  | protein_coding | 0.02            | 1.29 (1.11-1.5)  | $7.94 \times 10^{-4}$ | $2.50 \times 10^{-2}$          | rs80237341                     | 156.12                         | Modified<br>UTMOST |
|                  |         |                | 0.03            | 2.98 (1.57-5.68) | $9.26 \times 10^{-4}$ | $2.81 \times 10^{-2}$          |                                |                                | JTI                |
| <i>HDGF</i>      | 1q23.1  | protein_coding | 0.04            | 1.47 (1.23-1.76) | $3.25 \times 10^{-5}$ | $2.00 \times 10^{-3}$          | rs80237341                     | 91.98                          | JTI                |
| <i>RRNAD1</i>    | 1q23.1  | protein_coding | 0.03            | 0.84 (0.77-0.92) | $1.52 \times 10^{-4}$ | $7.07 \times 10^{-3}$          | rs80237341                     | 413.16                         | Modified<br>UTMOST |
|                  |         |                | 0.04            | 0.89 (0.85-0.94) | $4.34 \times 10^{-5}$ | $2.58 \times 10^{-3}$          |                                |                                | JTI                |
| <i>LAMC1-ASI</i> | 1q25.3  | lncRNA         | 0.05            | 0.88 (0.83-0.93) | $2.19 \times 10^{-6}$ | $2.00 \times 10^{-4}$          | rs34295433                     | 75.09                          | Modified<br>UTMOST |
|                  |         |                | 0.06            | 0.89 (0.85-0.94) | $1.68 \times 10^{-5}$ | $1.14 \times 10^{-3}$          |                                |                                | JTI                |
| <i>PPP1R15B</i>  | 1q32.1  | protein_coding | 0.03            | 0.84 (0.79-0.9)  | $6.52 \times 10^{-7}$ | $6.78 \times 10^{-5}$          | rs138638958                    | 342.15                         | PrediXcan          |
|                  |         |                | 0.02            | 0.84 (0.79-0.9)  | $2.23 \times 10^{-7}$ | $2.66 \times 10^{-5}$          |                                |                                | JTI                |
| <i>RAD54L</i>    | 1p34.1  | protein_coding | 0.03            | 0.81 (0.74-0.9)  | $5.00 \times 10^{-5}$ | $2.89 \times 10^{-3}$          | rs544780844                    | 38.29                          | Modified<br>UTMOST |
|                  |         |                | 0.04            | 0.87 (0.81-0.95) | $8.63 \times 10^{-4}$ | $2.66 \times 10^{-2}$          |                                |                                | JTI                |
| <i>CLCNKA</i>    | 1p36.13 | protein_coding | 0.08            | 1.12 (1.04-1.19) | $1.14 \times 10^{-3}$ | $3.30 \times 10^{-2}$          | rs10803412                     | 468.54                         | PrediXcan          |
|                  |         |                | 0.08            | 1.11 (1.05-1.17) | $4.19 \times 10^{-4}$ | $1.54 \times 10^{-2}$          |                                |                                | Modified<br>UTMOST |
|                  |         |                | 0.07            | 1.09 (1.03-1.14) | $1.42 \times 10^{-3}$ | $3.86 \times 10^{-2}$          |                                |                                | JTI                |
| <i>CLCNKB</i>    | 1p36.13 | protein_coding | 0.04            | 1.17 (1.07-1.27) | $3.94 \times 10^{-4}$ | $1.49 \times 10^{-2}$          | rs10803412                     | 493.44                         | PrediXcan          |
|                  |         |                | 0.07            | 1.14 (1.07-1.22) | $1.06 \times 10^{-4}$ | $5.24 \times 10^{-3}$          |                                |                                | Modified           |

|                       |         |                |      |                  |                        |                        |            |         |                    |
|-----------------------|---------|----------------|------|------------------|------------------------|------------------------|------------|---------|--------------------|
|                       |         |                |      |                  |                        |                        |            |         | UTMOST             |
| <i>AL450998.2</i>     | 1p36.21 | lncRNA         | 0.03 | 1.21 (1.08-1.35) | $9.96 \times 10^{-4}$  | $2.97 \times 10^{-2}$  | rs10803412 | 216.27  | Modified<br>UTMOST |
| <b><i>CENPS</i></b>   | 1p36.22 | protein_coding | 0.07 | 0.89 (0.85-0.94) | $1.46 \times 10^{-5}$  | $1.01 \times 10^{-3}$  | rs636291   | 43.89   | PrediXcan          |
|                       |         |                | 0.06 | 0.91 (0.87-0.95) | $3.51 \times 10^{-5}$  | $2.15 \times 10^{-3}$  | rs636291   | 43.89   | Modified<br>UTMOST |
|                       |         |                | 0.12 | 0.92 (0.89-0.96) | $1.40 \times 10^{-5}$  | $9.67 \times 10^{-4}$  | rs636291   | 43.89   | JTI                |
| <i>CORT</i>           | 1p36.22 | protein_coding | 0.03 | 1.18 (1.08-1.29) | $2.15 \times 10^{-4}$  | $9.20 \times 10^{-3}$  | rs636291   | 44.14   | JTI                |
| <b><i>DENND4B</i></b> | 1q21.3  | protein_coding | 0.05 | 1.09 (1.03-1.14) | $1.25 \times 10^{-3}$  | $3.52 \times 10^{-2}$  | rs34579442 | 19.27   | PrediXcan          |
|                       |         |                | 0.09 | 1.12 (1.06-1.19) | $2.31 \times 10^{-5}$  | $1.50 \times 10^{-3}$  | rs34579442 | 19.27   | Modified<br>UTMOST |
|                       |         |                | 0.12 | 1.07 (1.04-1.11) | $1.31 \times 10^{-5}$  | $9.15 \times 10^{-4}$  | rs34579442 | 19.27   | JTI                |
| <i>GABPB2</i>         | 1q21.3  | protein_coding | 0.02 | 1.24 (1.13-1.35) | $4.77 \times 10^{-6}$  | $3.95 \times 10^{-4}$  | rs17599629 | 439.73  | PrediXcan          |
|                       |         |                | 0.03 | 1.12 (1.05-1.18) | $2.29 \times 10^{-4}$  | $9.66 \times 10^{-3}$  | rs17599629 | 439.73  | Modified<br>UTMOST |
| <i>NUP210L</i>        | 1q21.3  | protein_coding | 0.09 | 1.14 (1.07-1.21) | $9.91 \times 10^{-5}$  | $4.96 \times 10^{-3}$  | rs34579442 | 227.69  | Modified<br>UTMOST |
| <i>PRUNE1</i>         | 1q21.3  | protein_coding | 0.03 | 0.72 (0.61-0.85) | $1.55 \times 10^{-4}$  | $7.17 \times 10^{-3}$  | rs17599629 | 349.90  | Modified<br>UTMOST |
| <i>AL512306.2</i>     | 1q32.1  | lncRNA         | 0.04 | 1.32 (1.18-1.49) | $2.56 \times 10^{-6}$  | $2.30 \times 10^{-4}$  | rs4245739  | 79.998  | Modified<br>UTMOST |
| <i>RNF181</i>         | 2p11.2  | protein_coding | 0.03 | 2.25 (1.87-2.72) | $4.99 \times 10^{-17}$ | $2.33 \times 10^{-14}$ | rs3731827  | 18.67   | Modified<br>UTMOST |
|                       |         |                | 0.06 | 1.35 (1.2-1.51)  | $2.68 \times 10^{-7}$  | $3.14 \times 10^{-5}$  | rs3731827  | 18.67   | JTI                |
| <i>AC092155.1</i>     | 2p15    | lncRNA         | 0.02 | 5.2 (3.56-7.58)  | $1.67 \times 10^{-17}$ | $8.26 \times 10^{-15}$ | rs901532   | 126.442 | JTI                |

|                   |        |                |      |                  |                       |                       |             |         |                    |
|-------------------|--------|----------------|------|------------------|-----------------------|-----------------------|-------------|---------|--------------------|
| <i>THADA</i>      | 2p21   | protein_coding | 0.03 | 0.88 (0.84-0.92) | $4.73 \times 10^{-7}$ | $5.14 \times 10^{-5}$ | rs28514770  | 28.10   | JTI                |
| <i>LINC01126</i>  | 2p21   | lncRNA         | 0.04 | 0.89 (0.82-0.95) | $1.36 \times 10^{-3}$ | $3.75 \times 10^{-2}$ | rs28514770  | 395.29  | PrediXcan          |
|                   |        |                | 0.13 | 0.92 (0.88-0.96) | $9.07 \times 10^{-5}$ | $4.66 \times 10^{-3}$ |             |         | JTI                |
| <i>STRADB</i>     | 2q33.1 | protein_coding | 0.03 | 0.83 (0.74-0.93) | $1.61 \times 10^{-3}$ | $4.23 \times 10^{-2}$ | rs59308963  | 222.09  | Modified<br>UTMOST |
|                   |        |                | 0.05 | 0.82 (0.72-0.93) | $1.97 \times 10^{-3}$ | $4.87 \times 10^{-2}$ | rs59308963  | 222.09  | JTI                |
| <i>AC007879.3</i> | 2q33.3 | lncRNA         | 0.03 | 1.32 (1.17-1.49) | $4.80 \times 10^{-6}$ | $3.96 \times 10^{-4}$ | rs12621900  | 17.51   | PrediXcan          |
|                   |        |                | 0.03 | 1.18 (1.1-1.26)  | $2.19 \times 10^{-6}$ | $2.00 \times 10^{-4}$ |             |         | Modified<br>UTMOST |
|                   |        |                | 0.09 | 1.16 (1.09-1.23) | $3.48 \times 10^{-6}$ | $3.04 \times 10^{-4}$ |             |         | JTI                |
| <i>FARP2</i>      | 2q37.3 | protein_coding | 0.18 | 0.95 (0.92-0.98) | $1.62 \times 10^{-3}$ | $4.24 \times 10^{-2}$ | rs111770284 | 277.17  | JTI                |
| <i>AC005104.1</i> | 2q37.3 | lncRNA         | 0.02 | 0.76 (0.68-0.86) | $5.74 \times 10^{-6}$ | $4.52 \times 10^{-4}$ | rs111770284 | 135.432 | PrediXcan          |
|                   |        |                | 0.04 | 0.91 (0.87-0.96) | $1.57 \times 10^{-4}$ | $7.22 \times 10^{-3}$ |             |         | Modified<br>UTMOST |
|                   |        |                | 0.1  | 0.85 (0.79-0.91) | $5.51 \times 10^{-6}$ | $4.36 \times 10^{-4}$ |             |         | JTI                |
| <i>SEPTIN2</i>    | 2q37.3 | protein_coding | 0.32 | 0.92 (0.89-0.95) | $4.74 \times 10^{-8}$ | $6.80 \times 10^{-6}$ | rs111770284 | 136.355 | PrediXcan          |
|                   |        |                | 0.36 | 0.94 (0.92-0.96) | $2.15 \times 10^{-7}$ | $2.58 \times 10^{-5}$ |             |         | Modified<br>UTMOST |
|                   |        |                | 0.37 | 0.96 (0.94-0.98) | $5.29 \times 10^{-6}$ | $4.27 \times 10^{-4}$ |             |         | JTI                |
| <i>ADAMTS9</i>    | 3p14.1 | protein_coding | 0.02 | 1.24 (1.12-1.37) | $5.96 \times 10^{-5}$ | $3.34 \times 10^{-3}$ | rs2660753   | 172.34  | PrediXcan          |
|                   |        |                | 0.04 | 1.24 (1.12-1.37) | $4.62 \times 10^{-5}$ | $2.70 \times 10^{-3}$ | rs2660753   | 172.34  | JTI                |
| <i>FLNB-AS1</i>   | 3p14.3 | lncRNA         | 0.03 | 0.87 (0.81-0.94) | $2.92 \times 10^{-4}$ | $1.18 \times 10^{-2}$ | rs2660753   | 8.09    | PrediXcan          |
|                   |        |                | 0.06 | 0.89 (0.84-0.94) | $1.63 \times 10^{-4}$ | $7.42 \times 10^{-3}$ | rs2660753   | 8.09    | Modified<br>UTMOST |

|                     |         |                |      |                  |                       |                       |           |       |                    |
|---------------------|---------|----------------|------|------------------|-----------------------|-----------------------|-----------|-------|--------------------|
|                     |         |                | 0.09 | 0.9 (0.86-0.95)  | $1.36 \times 10^{-4}$ | $6.47 \times 10^{-3}$ | rs2660753 | 8.09  | JTI                |
| <i>PDE12</i>        | 3p14.3  | protein_coding | 0.02 | 0.81 (0.71-0.92) | $1.51 \times 10^{-3}$ | $4.05 \times 10^{-2}$ | rs2660753 | 10.57 | JTI                |
| <i>AC137630.3</i>   | 3p21.31 | lncRNA         | 0.04 | 1.3 (1.14-1.49)  | $1.43 \times 10^{-4}$ | $6.73 \times 10^{-3}$ | rs2660753 | 0.39  | JTI                |
| <b><i>AMT</i></b>   | 3p21.31 | protein_coding | 0.32 | 0.95 (0.93-0.97) | $1.81 \times 10^{-5}$ | $1.22 \times 10^{-3}$ | rs2660753 | 5.98  | PrediXcan          |
|                     |         |                | 0.33 | 0.95 (0.92-0.97) | $5.42 \times 10^{-5}$ | $3.10 \times 10^{-3}$ | rs2660753 | 5.98  | Modified<br>UTMOST |
|                     |         |                | 0.35 | 0.96 (0.94-0.98) | $5.24 \times 10^{-5}$ | $3.02 \times 10^{-3}$ | rs2660753 | 5.98  | JTI                |
| <i>DALRD3</i>       | 3p21.31 | protein_coding | 0.07 | 0.9 (0.84-0.95)  | $4.54 \times 10^{-4}$ | $1.64 \times 10^{-2}$ | rs2660753 | 6.81  | Modified<br>UTMOST |
|                     |         |                | 0.05 | 0.82 (0.75-0.91) | $1.37 \times 10^{-4}$ | $6.48 \times 10^{-3}$ | rs2660753 | 6.81  | JTI                |
| <b><i>GMPPB</i></b> | 3p21.31 | protein_coding | 0.36 | 1.05 (1.03-1.08) | $1.57 \times 10^{-6}$ | $1.47 \times 10^{-4}$ | rs2660753 | 7.11  | PrediXcan          |
|                     |         |                | 0.38 | 1.06 (1.04-1.09) | $2.03 \times 10^{-6}$ | $1.86 \times 10^{-4}$ | rs2660753 | 7.11  | Modified<br>UTMOST |
|                     |         |                | 0.4  | 1.05 (1.03-1.07) | $5.43 \times 10^{-6}$ | $4.33 \times 10^{-4}$ | rs2660753 | 7.11  | JTI                |
| <i>NICNI</i>        | 3p21.31 | protein_coding | 0.14 | 0.92 (0.89-0.95) | $4.27 \times 10^{-6}$ | $3.59 \times 10^{-4}$ | rs2660753 | 6.38  | PrediXcan          |
|                     |         |                | 0.16 | 0.92 (0.89-0.96) | $1.87 \times 10^{-5}$ | $1.26 \times 10^{-3}$ | rs2660753 | 6.38  | Modified<br>UTMOST |
|                     |         |                | 0.2  | 0.92 (0.88-0.95) | $1.05 \times 10^{-5}$ | $7.62 \times 10^{-4}$ | rs2660753 | 6.38  | JTI                |
| <i>P4HTM</i>        | 3p21.31 | protein_coding | 0.04 | 0.91 (0.87-0.96) | $3.25 \times 10^{-4}$ | $1.29 \times 10^{-2}$ | rs2660753 | 17.27 | PrediXcan          |
|                     |         |                | 0.08 | 0.93 (0.89-0.97) | $1.07 \times 10^{-3}$ | $3.12 \times 10^{-2}$ | rs2660753 | 17.27 | JTI                |
| <i>QRICH1</i>       | 3p21.31 | protein_coding | 0.05 | 1.1 (1.05-1.16)  | $1.35 \times 10^{-4}$ | $6.45 \times 10^{-3}$ | rs2660753 | 64.66 | PrediXcan          |
|                     |         |                | 0.11 | 1.09 (1.04-1.13) | $3.55 \times 10^{-5}$ | $2.17 \times 10^{-3}$ | rs2660753 | 64.66 | Modified<br>UTMOST |
|                     |         |                | 0.12 | 1.08 (1.04-1.12) | $1.40 \times 10^{-4}$ | $6.59 \times 10^{-3}$ | rs2660753 | 64.66 | JTI                |

|                      |         |                |      |                  |                       |                       |            |        |                    |
|----------------------|---------|----------------|------|------------------|-----------------------|-----------------------|------------|--------|--------------------|
| <b><i>RNF123</i></b> | 3p21.31 | protein_coding | 0.03 | 1.14 (1.06-1.23) | $6.48 \times 10^{-4}$ | $2.16 \times 10^{-2}$ | rs2660753  | 32.03  | PrediXcan          |
|                      |         |                | 0.06 | 1.09 (1.05-1.14) | $4.54 \times 10^{-5}$ | $2.67 \times 10^{-3}$ | rs2660753  | 32.03  | Modified<br>UTMOST |
|                      |         |                | 0.09 | 1.08 (1.04-1.12) | $6.42 \times 10^{-5}$ | $3.55 \times 10^{-3}$ | rs2660753  | 32.03  | JTI                |
| <i>SLC26A6</i>       | 3p21.31 | protein_coding | 0.06 | 0.9 (0.84-0.96)  | $2.01 \times 10^{-3}$ | $4.94 \times 10^{-2}$ | rs2660753  | 9.77   | Modified<br>UTMOST |
| <b><i>TMEM89</i></b> | 3p21.31 | protein_coding | 0.04 | 0.94 (0.9-0.97)  | $4.99 \times 10^{-4}$ | $1.76 \times 10^{-2}$ | rs2660753  | 1.10   | PrediXcan          |
|                      |         |                | 0.06 | 0.88 (0.81-0.95) | $9.49 \times 10^{-4}$ | $2.87 \times 10^{-2}$ | rs2660753  | 1.10   | Modified<br>UTMOST |
|                      |         |                | 0.07 | 0.91 (0.86-0.96) | $9.56 \times 10^{-4}$ | $2.88 \times 10^{-2}$ | rs2660753  | 1.10   | JTI                |
| <i>UBA7</i>          | 3p21.31 | protein_coding | 0.07 | 0.84 (0.76-0.94) | $1.62 \times 10^{-3}$ | $4.24 \times 10^{-2}$ | rs2660753  | 8.74   | Modified<br>UTMOST |
| <i>USP4</i>          | 3p21.31 | protein_coding | 0.02 | 1.26 (1.13-1.41) | $3.21 \times 10^{-5}$ | $1.98 \times 10^{-3}$ | rs2660753  | 62.88  | JTI                |
| <i>SRGAP3</i>        | 3p25.3  | protein_coding | 0.03 | 0.88 (0.81-0.95) | $1.05 \times 10^{-3}$ | $3.09 \times 10^{-2}$ | rs2660753  | 382.46 | Modified<br>UTMOST |
|                      |         |                | 0.04 | 0.88 (0.81-0.95) | $1.04 \times 10^{-3}$ | $3.06 \times 10^{-2}$ | rs2660753  | 382.46 | JTI                |
| <i>THUMPD3</i>       | 3p25.3  | protein_coding | 0.05 | 1.13 (1.05-1.22) | $1.09 \times 10^{-3}$ | $3.18 \times 10^{-2}$ | rs2660753  | 23.95  | PrediXcan          |
|                      |         |                | 0.12 | 1.08 (1.04-1.12) | $1.21 \times 10^{-4}$ | $5.89 \times 10^{-3}$ | rs2660753  | 23.95  | Modified<br>UTMOST |
| <i>AC063944.3</i>    | 3q13.12 | lncRNA         | 0.02 | 2.67 (1.91-3.73) | $9.06 \times 10^{-9}$ | $1.45 \times 10^{-6}$ | rs1283104  | 0.53   | Modified<br>UTMOST |
| <i>ACAD9</i>         | 3q21.3  | protein_coding | 0.04 | 1.07 (1.03-1.11) | $2.23 \times 10^{-4}$ | $9.47 \times 10^{-3}$ | rs56325233 | 36.47  | PrediXcan          |
| <b><i>ACPP</i></b>   | 3q22.1  | protein_coding | 0.11 | 0.84 (0.78-0.9)  | $5.79 \times 10^{-7}$ | $6.16 \times 10^{-5}$ | rs56325233 | 50.93  | PrediXcan          |
|                      |         |                | 0.06 | 0.74 (0.64-0.86) | $1.29 \times 10^{-4}$ | $6.22 \times 10^{-3}$ | rs56325233 | 50.93  | Modified<br>UTMOST |

|                          |         |                |      |                    |                        |                        |             |        |                    |
|--------------------------|---------|----------------|------|--------------------|------------------------|------------------------|-------------|--------|--------------------|
|                          |         |                | 0.14 | 0.8 (0.74-0.88)    | $8.08 \times 10^{-7}$  | $8.09 \times 10^{-5}$  | rs56325233  | 50.93  | JTI                |
| <i>SOX14</i>             | 3q22.3  | protein_coding | 0.02 | 1.11 (1.04-1.18)   | $1.26 \times 10^{-3}$  | $3.55 \times 10^{-2}$  | rs56325233  | 0.82   | JTI                |
| <i>MBNL1-AS1</i>         | 3q25.1  | lncRNA         | 0.03 | 1.06 (1.03-1.09)   | $2.55 \times 10^{-4}$  | $1.06 \times 10^{-2}$  | rs182314334 | 6.94   | JTI                |
| <i>TRIM59</i>            | 3q25.33 | protein_coding | 0.02 | 1.36 (1.19-1.56)   | $5.34 \times 10^{-6}$  | $4.29 \times 10^{-4}$  | rs182314334 | 53.33  | Modified<br>UTMOST |
|                          |         |                | 0.05 | 1.22 (1.12-1.34)   | $1.68 \times 10^{-5}$  | $1.14 \times 10^{-3}$  | rs182314334 | 53.33  | JTI                |
| <b><i>AC073288.2</i></b> | 3q26.2  | lncRNA         | 0.05 | 0.56 (0.51-0.61)   | $1.29 \times 10^{-35}$ | $3.91 \times 10^{-32}$ | rs11288195  | 8.10   | PrediXcan          |
|                          |         |                | 0.09 | 0.77 (0.73-0.81)   | $4.40 \times 10^{-26}$ | $5.92 \times 10^{-23}$ | rs11288195  | 8.10   | Modified<br>UTMOST |
|                          |         |                | 0.11 | 0.83 (0.8-0.86)    | $1.78 \times 10^{-25}$ | $2.05 \times 10^{-22}$ | rs11288195  | 8.10   | JTI                |
| <i>LRR1Q4</i>            | 3q26.2  | protein_coding | 0.02 | 0.78 (0.7-0.88)    | $2.90 \times 10^{-5}$  | $1.81 \times 10^{-3}$  | rs71277158  | 15.85  | Modified<br>UTMOST |
| <i>SKIL</i>              | 3q26.2  | protein_coding | 0.03 | 7.21 (5.78-8.99)   | $2.36 \times 10^{-68}$ | $1.14 \times 10^{-64}$ | rs78416326  | 39.16  | Modified<br>UTMOST |
|                          |         |                | 0.03 | 3.67 (3.21-4.21)   | $2.98 \times 10^{-77}$ | $1.81 \times 10^{-73}$ | rs78416326  | 39.16  | JTI                |
| <i>ATP11B</i>            | 3q26.33 | protein_coding | 0.11 | 1.15 (1.06-1.26)   | $1.06 \times 10^{-3}$  | $3.11 \times 10^{-2}$  | rs10936632  | 128.14 | JTI                |
| <i>ECE2</i>              | 3q27.1  | protein_coding | 0.02 | 0.85 (0.77-0.94)   | $1.89 \times 10^{-3}$  | $4.71 \times 10^{-2}$  | rs10936632  | 43.38  | Modified<br>UTMOST |
| <i>RASSF6</i>            | 4q13.3  | protein_coding | 0.05 | 14.76 (7.35-29.64) | $5.06 \times 10^{-14}$ | $1.67 \times 10^{-11}$ | rs1894292   | 137.19 | Modified<br>UTMOST |
|                          |         |                | 0.03 | 1.43 (1.31-1.56)   | $6.34 \times 10^{-15}$ | $2.36 \times 10^{-12}$ | rs1894292   | 137.19 | JTI                |
| <i>AC004069.1</i>        | 4q24    | lncRNA         | 0.02 | 1.44 (1.34-1.55)   | $1.55 \times 10^{-23}$ | $1.39 \times 10^{-20}$ | rs7679673   | 0.24   | JTI                |
| <i>TET2-AS1</i>          | 4q24    | lncRNA         | 0.03 | 0.86 (0.8-0.92)    | $3.94 \times 10^{-5}$  | $2.38 \times 10^{-3}$  | rs34480284  | 34.59  | Modified<br>UTMOST |
| <i>LINC01095</i>         | 4q31.22 | lncRNA         | 0.03 | 0.89 (0.84-0.95)   | $6.20 \times 10^{-4}$  | $2.09 \times 10^{-2}$  | rs72725734  | 163.83 | PrediXcan          |

|                   |         |                |      |                  |                        |                        |             |        |                    |
|-------------------|---------|----------------|------|------------------|------------------------|------------------------|-------------|--------|--------------------|
|                   |         |                | 0.06 | 0.88 (0.83-0.94) | $4.32 \times 10^{-5}$  | $2.57 \times 10^{-3}$  |             |        | JTI                |
| <b>REELD1</b>     | 4q31.22 | protein_coding | 0.3  | 1.05 (1.02-1.07) | $3.59 \times 10^{-4}$  | $1.39 \times 10^{-2}$  | rs72725734  | 270.97 | PrediXcan          |
|                   |         |                | 0.31 | 1.04 (1.02-1.07) | $1.68 \times 10^{-4}$  | $7.59 \times 10^{-3}$  |             |        | Modified<br>UTMOST |
|                   |         |                | 0.34 | 1.03 (1.02-1.05) | $1.52 \times 10^{-4}$  | $7.07 \times 10^{-3}$  |             |        | JTI                |
| <i>RPS3A</i>      | 4q31.3  | protein_coding | 0.03 | 0.88 (0.83-0.93) | $6.21 \times 10^{-6}$  | $4.79 \times 10^{-4}$  | rs147762399 | 9.61   | JTI                |
| <i>AC116351.2</i> | 5p15.33 | lncRNA         | 0.03 | 0.9 (0.85-0.96)  | $8.99 \times 10^{-4}$  | $2.75 \times 10^{-2}$  | rs2242652   | 273.29 | JTI                |
| <i>MRPL36</i>     | 5p15.33 | protein_coding | 0.03 | 1.11 (1.04-1.18) | $7.10 \times 10^{-4}$  | $2.31 \times 10^{-2}$  | rs4975758   | 89.69  | Modified<br>UTMOST |
| <b>AC025183.1</b> | 5p15.33 | lncRNA         | 0.17 | 0.78 (0.74-0.81) | $1.73 \times 10^{-25}$ | $2.05 \times 10^{-22}$ | rs4975758   | 6.411  | PrediXcan          |
|                   |         |                | 0.15 | 0.62 (0.57-0.68) | $1.44 \times 10^{-26}$ | $2.49 \times 10^{-23}$ |             |        | Modified<br>UTMOST |
|                   |         |                | 0.18 | 0.8 (0.76-0.83)  | $7.33 \times 10^{-26}$ | $9.35 \times 10^{-23}$ |             |        | JTI                |
| <i>JADE2</i>      | 5q31.1  | protein_coding | 0.04 | 0.69 (0.58-0.83) | $5.31 \times 10^{-5}$  | $3.05 \times 10^{-3}$  | rs10793821  | 82.71  | JTI                |
| <i>FOXP4-AS1</i>  | 6p21.1  | lncRNA         | 0.03 | 0.77 (0.71-0.83) | $2.58 \times 10^{-10}$ | $4.96 \times 10^{-8}$  | rs1983891   | 20.07  | JTI                |
| <i>MDFI</i>       | 6p21.1  | protein_coding | 0.04 | 2.63 (1.83-3.79) | $2.08 \times 10^{-7}$  | $2.53 \times 10^{-5}$  | rs6458228   | 78.19  | Modified<br>UTMOST |
| <i>AL451165.2</i> | 6p21.31 | lncRNA         | 0.03 | 0.7 (0.58-0.86)  | $6.88 \times 10^{-4}$  | $2.26 \times 10^{-2}$  | rs9469899   | 127.88 | JTI                |
| <i>TAF11</i>      | 6p21.31 | protein_coding | 0.03 | 1.26 (1.12-1.42) | $1.27 \times 10^{-4}$  | $6.15 \times 10^{-3}$  | rs9469899   | 62.74  | Modified<br>UTMOST |
| <i>BTNL2</i>      | 6p21.32 | protein_coding | 0.05 | 1.13 (1.07-1.19) | $1.54 \times 10^{-5}$  | $1.05 \times 10^{-3}$  | rs3129859   | 26.03  | Modified<br>UTMOST |
|                   |         |                | 0.11 | 1.12 (1.06-1.18) | $4.09 \times 10^{-5}$  | $2.46 \times 10^{-3}$  | rs3129859   | 26.03  | JTI                |
| <b>HLA-DMA</b>    | 6p21.32 | protein_coding | 0.12 | 0.94 (0.91-0.97) | $9.11 \times 10^{-5}$  | $4.66 \times 10^{-3}$  | rs9296068   | 51.82  | PrediXcan          |
|                   |         |                | 0.16 | 0.92 (0.88-0.96) | $1.52 \times 10^{-4}$  | $7.07 \times 10^{-3}$  | rs9296068   | 51.82  | Modified           |



|                   |         |                |      |                  |                       |                       |            |        |                 |
|-------------------|---------|----------------|------|------------------|-----------------------|-----------------------|------------|--------|-----------------|
|                   |         |                |      |                  |                       |                       |            |        | UTMOST          |
|                   |         |                | 0.18 | 0.94 (0.91-0.98) | $8.06 \times 10^{-4}$ | $2.53 \times 10^{-2}$ | rs9296068  | 51.82  | JTI             |
| <i>HLA-DOB</i>    | 6p21.32 | protein_coding | 0.4  | 1.04 (1.02-1.06) | $7.21 \times 10^{-4}$ | $2.33 \times 10^{-2}$ | rs9296068  | 203.87 | PrediXcan       |
|                   |         |                | 0.43 | 1.03 (1.01-1.05) | $1.98 \times 10^{-3}$ | $4.88 \times 10^{-2}$ | rs9296068  | 203.87 | JTI             |
| <i>KIFC1</i>      | 6p21.32 | protein_coding | 0.07 | 0.92 (0.87-0.97) | $1.76 \times 10^{-3}$ | $4.48 \times 10^{-2}$ | rs9296068  | 389.01 | PrediXcan       |
|                   |         |                | 0.07 | 0.94 (0.9-0.98)  | $2.00 \times 10^{-3}$ | $4.93 \times 10^{-2}$ | rs9296068  | 389.01 | JTI             |
| <i>SLC39A7</i>    | 6p21.32 | protein_coding | 0.03 | 1.22 (1.12-1.33) | $3.41 \times 10^{-6}$ | $2.99 \times 10^{-4}$ | rs9296068  | 183.52 | JTI             |
| <i>TAP2</i>       | 6p21.32 | protein_coding | 0.15 | 0.94 (0.91-0.97) | $4.63 \times 10^{-4}$ | $1.66 \times 10^{-2}$ | rs9296068  | 182.14 | Modified UTMOST |
| <i>TAPBP</i>      | 6p21.32 | protein_coding | 0.04 | 0.9 (0.86-0.95)  | $6.95 \times 10^{-5}$ | $3.81 \times 10^{-3}$ | rs9296068  | 293.47 | PrediXcan       |
|                   |         |                | 0.1  | 0.93 (0.89-0.96) | $1.36 \times 10^{-4}$ | $6.48 \times 10^{-3}$ | rs9296068  | 293.47 | Modified UTMOST |
|                   |         |                | 0.11 | 0.91 (0.86-0.95) | $3.72 \times 10^{-5}$ | $2.26 \times 10^{-3}$ | rs9296068  | 293.47 | JTI             |
| <i>VPS52</i>      | 6p21.32 | protein_coding | 0.04 | 1.3 (1.15-1.48)  | $4.27 \times 10^{-5}$ | $2.55 \times 10^{-3}$ | rs9296068  | 251.13 | Modified UTMOST |
| <i>WDR46</i>      | 6p21.32 | protein_coding | 0.03 | 0.71 (0.59-0.86) | $4.26 \times 10^{-4}$ | $1.56 \times 10^{-2}$ | rs9296068  | 268.61 | Modified UTMOST |
| <i>ABCF1</i>      | 6p21.33 | protein_coding | 0.02 | 0.88 (0.82-0.95) | $1.10 \times 10^{-3}$ | $3.21 \times 10^{-2}$ | rs12665339 | 36.28  | PrediXcan       |
|                   |         |                | 0.04 | 0.84 (0.77-0.92) | $1.96 \times 10^{-4}$ | $8.47 \times 10^{-3}$ | rs12665339 | 36.28  | Modified UTMOST |
|                   |         |                | 0.07 | 0.93 (0.89-0.97) | $2.72 \times 10^{-4}$ | $1.12 \times 10^{-2}$ | rs12665339 | 36.28  | JTI             |
| <i>ABHD16A</i>    | 6p21.33 | protein_coding | 0.05 | 1.16 (1.1-1.22)  | $2.93 \times 10^{-8}$ | $4.30 \times 10^{-6}$ | rs2596546  | 341.84 | JTI             |
| <i>AL645933.2</i> | 6p21.33 | lncRNA         | 0.55 | 1.03 (1.01-1.05) | $1.23 \times 10^{-3}$ | $3.47 \times 10^{-2}$ | rs2596546  | 33.89  | Modified UTMOST |
|                   |         |                | 0.56 | 1.03 (1.01-1.04) | $1.39 \times 10^{-3}$ | $3.80 \times 10^{-2}$ | rs2596546  | 33.89  | JTI             |

|                      |         |                      |      |                   |                        |                        |            |        |                    |
|----------------------|---------|----------------------|------|-------------------|------------------------|------------------------|------------|--------|--------------------|
| <i>C2</i>            | 6p21.33 | protein_coding       | 0.03 | 0.71 (0.62-0.81)  | $2.86 \times 10^{-7}$  | $3.29 \times 10^{-5}$  | rs3096702  | 278.88 | JTI                |
| <i>C4B</i>           | 6p21.33 | protein_coding       | 0.1  | 0.89 (0.85-0.92)  | $4.02 \times 10^{-9}$  | $6.77 \times 10^{-7}$  | rs3096702  | 189.14 | Modified<br>UTMOST |
|                      |         |                      | 0.06 | 0.77 (0.7-0.84)   | $4.31 \times 10^{-9}$  | $7.16 \times 10^{-7}$  | rs3096702  | 189.14 | JTI                |
| <b><i>CCHCR1</i></b> | 6p21.33 | protein_coding       | 0.27 | 0.9 (0.88-0.93)   | $5.04 \times 10^{-13}$ | $1.45 \times 10^{-10}$ | rs130067   | 7.50   | PrediXcan          |
|                      |         |                      | 0.31 | 0.92 (0.9-0.94)   | $4.23 \times 10^{-12}$ | $1.10 \times 10^{-9}$  | rs130067   | 7.50   | Modified<br>UTMOST |
|                      |         |                      | 0.32 | 0.91 (0.89-0.94)  | $5.23 \times 10^{-11}$ | $1.17 \times 10^{-8}$  | rs130067   | 7.50   | JTI                |
| <i>DDAH2</i>         | 6p21.33 | protein_coding       | 0.04 | 1.49 (1.32-1.67)  | $3.37 \times 10^{-11}$ | $7.78 \times 10^{-9}$  | rs2596546  | 369.01 | JTI                |
| <i>DHX16</i>         | 6p21.33 | protein_coding       | 0.05 | 5.55 (3.07-10.04) | $1.76 \times 10^{-8}$  | $2.72 \times 10^{-6}$  | rs12665339 | 39.58  | Modified<br>UTMOST |
|                      |         |                      | 0.09 | 1.44 (1.16-1.8)   | $1.08 \times 10^{-3}$  | $3.17 \times 10^{-2}$  | rs12665339 | 39.58  | JTI                |
| <i>GTF2H4</i>        | 6p21.33 | protein_coding       | 0.02 | 0.93 (0.89-0.97)  | $7.65 \times 10^{-4}$  | $2.43 \times 10^{-2}$  | rs12665339 | 280.65 | PrediXcan          |
| <b><i>HCG20</i></b>  | 6p21.33 | lncRNA               | 0.05 | 1.11 (1.06-1.17)  | $3.18 \times 10^{-5}$  | $1.97 \times 10^{-3}$  | rs12665339 | 158.80 | PrediXcan          |
|                      |         |                      | 0.09 | 1.1 (1.06-1.14)   | $1.40 \times 10^{-6}$  | $1.33 \times 10^{-4}$  | rs12665339 | 158.80 | Modified<br>UTMOST |
|                      |         |                      | 0.11 | 1.1 (1.06-1.15)   | $6.05 \times 10^{-7}$  | $6.38 \times 10^{-5}$  | rs12665339 | 158.80 | JTI                |
| <i>HLA-E</i>         | 6p21.33 | protein_coding       | 0.03 | 0.89 (0.84-0.95)  | $1.97 \times 10^{-4}$  | $8.49 \times 10^{-3}$  | rs12665339 | 139.25 | JTI                |
| <i>IER3</i>          | 6p21.33 | protein_coding       | 0.02 | 1.29 (1.15-1.46)  | $2.92 \times 10^{-5}$  | $1.82 \times 10^{-3}$  | rs12665339 | 111.10 | Modified<br>UTMOST |
| <i>LINC00243</i>     | 6p21.33 | processed_transcript | 0.04 | 0.88 (0.82-0.94)  | $2.84 \times 10^{-4}$  | $1.15 \times 10^{-2}$  | rs12665339 | 197.20 | Modified<br>UTMOST |
| <i>LINC02571</i>     | 6p21.33 | lncRNA               | 0.14 | 0.94 (0.91-0.97)  | $5.47 \times 10^{-4}$  | $1.89 \times 10^{-2}$  | rs2596546  | 59.97  | JTI                |
| <i>MICB</i>          | 6p21.33 | protein_coding       | 0.23 | 0.95 (0.93-0.97)  | $5.89 \times 10^{-7}$  | $6.23 \times 10^{-5}$  | rs2596546  | 149.52 | PrediXcan          |
|                      |         |                      | 0.21 | 0.93 (0.9-0.97)   | $1.58 \times 10^{-4}$  | $7.26 \times 10^{-3}$  | rs2596546  | 149.52 | Modified           |

|                        |         |                |      |                  |                        |                       |             |         |                 |
|------------------------|---------|----------------|------|------------------|------------------------|-----------------------|-------------|---------|-----------------|
|                        |         |                |      |                  |                        |                       |             |         | UTMOST          |
|                        |         |                | 0.31 | 0.96 (0.94-0.98) | $2.80 \times 10^{-5}$  | $1.76 \times 10^{-3}$ | rs2596546   | 149.52  | JTI             |
| <i>NELFE</i>           | 6p21.33 | protein_coding | 0.04 | 1.25 (1.11-1.42) | $3.83 \times 10^{-4}$  | $1.46 \times 10^{-2}$ | rs3096702   | 265.44  | JTI             |
| <i>SAPCD1</i>          | 6p21.33 | protein_coding | 0.02 | 1.1 (1.04-1.17)  | $1.26 \times 10^{-3}$  | $3.54 \times 10^{-2}$ | rs3096702   | 459.70  | PrediXcan       |
| <i>SFTA2</i>           | 6p21.33 | protein_coding | 0.04 | 0.8 (0.73-0.88)  | $9.19 \times 10^{-6}$  | $6.79 \times 10^{-4}$ | rs12665339  | 298.72  | PrediXcan       |
| <b><i>STK19</i></b>    | 6p21.33 | protein_coding | 0.05 | 1.13 (1.06-1.22) | $4.19 \times 10^{-4}$  | $1.54 \times 10^{-2}$ | rs3096702   | 241.73  | PrediXcan       |
|                        |         |                | 0.15 | 1.3 (1.17-1.46)  | $3.88 \times 10^{-6}$  | $3.30 \times 10^{-4}$ | rs3096702   | 241.73  | JTI             |
|                        |         |                | 0.14 | 0.94 (0.91-0.98) | $9.84 \times 10^{-4}$  | $2.95 \times 10^{-2}$ | rs130067    | 16.43   | PrediXcan       |
| <i>TCF19</i>           | 6p21.33 | protein_coding | 0.18 | 0.94 (0.91-0.97) | $2.87 \times 10^{-4}$  | $1.16 \times 10^{-2}$ | rs130067    | 16.43   | Modified UTMOST |
|                        |         |                | 0.17 | 0.92 (0.89-0.96) | $1.88 \times 10^{-5}$  | $1.26 \times 10^{-3}$ | rs130067    | 16.43   | JTI             |
| <i>RPP21</i>           | 6p22.1  | protein_coding | 0.02 | 3.28 (2.25-4.77) | $6.57 \times 10^{-10}$ | $1.21 \times 10^{-7}$ | rs12665339  | 286.57  | Modified UTMOST |
| <b>AL645939.4</b>      | 6p22.1  | lncRNA         | 0.1  | 1.1 (1.05-1.14)  | $3.79 \times 10^{-6}$  | $3.23 \times 10^{-4}$ | rs7767188   | 353.792 | PrediXcan       |
|                        |         |                | 0.14 | 1.12 (1.07-1.17) | $1.41 \times 10^{-6}$  | $1.33 \times 10^{-4}$ |             |         | Modified UTMOST |
|                        |         |                | 0.16 | 1.12 (1.07-1.18) | $5.47 \times 10^{-6}$  | $4.35 \times 10^{-4}$ |             |         | JTI             |
| <i>MRPL18</i>          | 6q25.3  | protein_coding | 0.07 | 0.89 (0.84-0.94) | $1.67 \times 10^{-4}$  | $7.56 \times 10^{-3}$ | rs651164    | 361.91  | PrediXcan       |
| <i>EVX1</i>            | 7p15.2  | protein_coding | 0.03 | 1.17 (1.06-1.28) | $1.06 \times 10^{-3}$  | $3.10 \times 10^{-2}$ | rs200362064 | 301.10  | JTI             |
| <b><i>HOTAIRM1</i></b> | 7p15.2  | lncRNA         | 0.3  | 1.06 (1.03-1.09) | $5.72 \times 10^{-5}$  | $3.23 \times 10^{-3}$ | rs200362064 | 451.33  | PrediXcan       |
|                        |         |                | 0.3  | 1.06 (1.03-1.1)  | $2.25 \times 10^{-4}$  | $9.51 \times 10^{-3}$ | rs200362064 | 451.33  | Modified UTMOST |
|                        |         |                | 0.38 | 1.04 (1.02-1.06) | $1.90 \times 10^{-5}$  | $1.27 \times 10^{-3}$ | rs200362064 | 451.33  | JTI             |
| <i>HOXA2</i>           | 7p15.2  | protein_coding | 0.03 | 0.83 (0.76-0.92) | $1.70 \times 10^{-4}$  | $7.64 \times 10^{-3}$ | rs200362064 | 448.78  | JTI             |

|                   |         |                |      |                  |                        |                       |             |         |                    |
|-------------------|---------|----------------|------|------------------|------------------------|-----------------------|-------------|---------|--------------------|
| <i>HOXA-AS2</i>   | 7p15.2  | lncRNA         | 0.07 | 1.12 (1.06-1.2)  | $2.61 \times 10^{-4}$  | $1.08 \times 10^{-2}$ | rs200362064 | 417.29  | PrediXcan          |
|                   |         |                | 0.11 | 1.11 (1.05-1.18) | $5.13 \times 10^{-4}$  | $1.80 \times 10^{-2}$ | rs200362064 | 417.29  | JTI                |
| <i>CDC47L</i>     | 7p15.3  | protein_coding | 0.02 | 0.85 (0.78-0.92) | $1.62 \times 10^{-4}$  | $7.42 \times 10^{-3}$ | rs35389879  | 173.66  | Modified<br>UTMOST |
| <i>SP8</i>        | 7p21.1  | protein_coding | 0.09 | 0.87 (0.81-0.93) | $1.22 \times 10^{-4}$  | $5.95 \times 10^{-3}$ | rs12155172  | 167.99  | JTI                |
| <i>AC067817.2</i> | 8p11.22 | lncRNA         | 0.03 | 1.19 (1.08-1.32) | $6.95 \times 10^{-4}$  | $2.27 \times 10^{-2}$ | rs11467     | 57.47   | JTI                |
| <i>CHMP7</i>      | 8p21.3  | protein_coding | 0.04 | 0.77 (0.67-0.87) | $4.72 \times 10^{-5}$  | $2.74 \times 10^{-3}$ | rs2928679   | 319.46  | JTI                |
| <i>TNFRSF10A</i>  | 8p21.3  | protein_coding | 0.11 | 0.92 (0.87-0.96) | $7.06 \times 10^{-4}$  | $2.30 \times 10^{-2}$ | rs2928679   | 356.34  | Modified<br>UTMOST |
| <i>AF131216.4</i> | 8p23.1  | lncRNA         | 0.03 | 0.83 (0.75-0.92) | $3.24 \times 10^{-4}$  | $1.29 \times 10^{-2}$ | rs2572375   | 76.47   | Modified<br>UTMOST |
|                   |         |                | 0.03 | 0.75 (0.64-0.88) | $5.60 \times 10^{-4}$  | $1.93 \times 10^{-2}$ |             |         | JTI                |
| <i>SLC35G5</i>    | 8p23.1  | protein_coding | 0.04 | 0.88 (0.81-0.95) | $1.76 \times 10^{-3}$  | $4.47 \times 10^{-2}$ | rs2572375   | 29.06   | Modified<br>UTMOST |
| <i>UBAP2</i>      | 9p13.3  | protein_coding | 0.03 | 2.55 (1.45-4.48) | $1.23 \times 10^{-3}$  | $3.47 \times 10^{-2}$ | rs10122495  | 0.83    | Modified<br>UTMOST |
| <i>AL356489.2</i> | 9p13.3  | lncRNA         | 0.2  | 1.06 (1.02-1.09) | $1.10 \times 10^{-3}$  | $3.20 \times 10^{-2}$ | rs10122495  | 348.795 | PrediXcan          |
|                   |         |                | 0.24 | 1.05 (1.02-1.08) | $1.52 \times 10^{-3}$  | $4.07 \times 10^{-2}$ |             |         | Modified<br>UTMOST |
| <i>SAXO1</i>      | 9p22.1  | protein_coding | 0.06 | 0.83 (0.78-0.89) | $6.36 \times 10^{-8}$  | $8.60 \times 10^{-6}$ | rs1048169   | 22.714  | Modified<br>UTMOST |
|                   |         |                | 0.06 | 0.68 (0.6-0.76)  | $6.96 \times 10^{-11}$ | $1.51 \times 10^{-8}$ |             |         | JTI                |
| <i>CNTRL</i>      | 9q33.2  | protein_coding | 0.04 | 1.47 (1.18-1.84) | $6.59 \times 10^{-4}$  | $2.19 \times 10^{-2}$ | rs1571801   | 487.49  | Modified<br>UTMOST |
| <i>WDR37</i>      | 10p15.3 | protein_coding | 0.09 | 1.12 (1.05-1.2)  | $7.69 \times 10^{-4}$  | $2.44 \times 10^{-2}$ | rs141536087 | 323.55  | JTI                |

|                          |          |                      |      |                  |                        |                       |            |         |                    |
|--------------------------|----------|----------------------|------|------------------|------------------------|-----------------------|------------|---------|--------------------|
| <i>ALOX5</i>             | 10q11.21 | protein_coding       | 0.08 | 0.88 (0.83-0.93) | $7.91 \times 10^{-6}$  | $5.94 \times 10^{-4}$ | rs76934034 | 141.42  | Modified<br>UTMOST |
| <b><i>AL356608.1</i></b> | 10q24.32 | lncRNA               | 0.04 | 1.11 (1.04-1.18) | $9.29 \times 10^{-4}$  | $2.82 \times 10^{-2}$ | rs34032774 | 260.07  | PrediXcan          |
|                          |          |                      | 0.09 | 1.1 (1.05-1.16)  | $2.68 \times 10^{-4}$  | $1.11 \times 10^{-2}$ | rs34032774 | 260.07  | Modified<br>UTMOST |
|                          |          |                      | 0.1  | 1.1 (1.04-1.17)  | $8.62 \times 10^{-4}$  | $2.66 \times 10^{-2}$ | rs34032774 | 260.07  | JTI                |
| <b><i>BORCS7</i></b>     | 10q24.32 | protein_coding       | 0.17 | 1.07 (1.03-1.11) | $1.25 \times 10^{-4}$  | $6.10 \times 10^{-3}$ | rs34032774 | 209.625 | PrediXcan          |
|                          |          |                      | 0.2  | 1.06 (1.03-1.09) | $4.69 \times 10^{-5}$  | $2.73 \times 10^{-3}$ |            |         | Modified<br>UTMOST |
|                          |          |                      | 0.22 | 1.05 (1.02-1.07) | $9.86 \times 10^{-5}$  | $4.96 \times 10^{-3}$ |            |         | JTI                |
| <b><i>RPARP-AS1</i></b>  | 10q24.32 | processed_transcript | 0.12 | 1.12 (1.09-1.16) | $7.81 \times 10^{-12}$ | $1.93 \times 10^{-9}$ | rs3850699  | 193.358 | PrediXcan          |
|                          |          |                      | 0.12 | 1.15 (1.1-1.21)  | $9.02 \times 10^{-9}$  | $1.45 \times 10^{-6}$ |            |         | Modified<br>UTMOST |
|                          |          |                      | 0.12 | 1.09 (1.06-1.13) | $4.82 \times 10^{-8}$  | $6.83 \times 10^{-6}$ |            |         | JTI                |
| <b><i>AL158212.2</i></b> | 10q25.2  | lncRNA               | 0.06 | 0.86 (0.82-0.91) | $3.26 \times 10^{-7}$  | $3.68 \times 10^{-5}$ | rs7094871  | 0.52    | PrediXcan          |
|                          |          |                      | 0.11 | 0.86 (0.82-0.91) | $5.57 \times 10^{-8}$  | $7.67 \times 10^{-6}$ |            |         | Modified<br>UTMOST |
|                          |          |                      | 0.12 | 0.91 (0.88-0.94) | $3.43 \times 10^{-8}$  | $5.01 \times 10^{-6}$ |            |         | JTI                |
| <b><i>EEFLAKMT2</i></b>  | 10q26.13 | protein_coding       | 0.28 | 1.05 (1.02-1.07) | $3.98 \times 10^{-4}$  | $1.49 \times 10^{-2}$ | rs67609008 | 160.50  | PrediXcan          |
|                          |          |                      | 0.3  | 1.05 (1.02-1.08) | $1.96 \times 10^{-4}$  | $8.47 \times 10^{-3}$ | rs67609008 | 160.50  | Modified<br>UTMOST |
|                          |          |                      | 0.32 | 1.04 (1.02-1.07) | $2.63 \times 10^{-4}$  | $1.09 \times 10^{-2}$ | rs67609008 | 160.50  | JTI                |
| <i>MADD</i>              | 11p11.2  | protein_coding       | 0.04 | 0.87 (0.82-0.93) | $7.85 \times 10^{-5}$  | $4.20 \times 10^{-3}$ | rs59111863 | 70.38   | JTI                |
| <i>NUPI60</i>            | 11p11.2  | protein_coding       | 0.04 | 0.73 (0.63-0.85) | $5.59 \times 10^{-5}$  | $3.17 \times 10^{-3}$ | rs59111863 | 448.15  | JTI                |
| <i>PAC3IN3</i>           | 11p11.2  | protein_coding       | 0.1  | 0.93 (0.9-0.97)  | $4.35 \times 10^{-4}$  | $1.59 \times 10^{-2}$ | rs59111863 | 213.97  | PrediXcan          |

|                         |         |                |      |                  |                        |                        |            |        |                    |
|-------------------------|---------|----------------|------|------------------|------------------------|------------------------|------------|--------|--------------------|
| <i>AC104237.2</i>       | 11p15.4 | lncRNA         | 0.07 | 0.92 (0.88-0.96) | $1.63 \times 10^{-4}$  | $7.42 \times 10^{-3}$  | rs12791447 | 164.36 | JTI                |
| <i>BRSK2</i>            | 11p15.5 | protein_coding | 0.03 | 0.8 (0.73-0.88)  | $7.42 \times 10^{-6}$  | $5.59 \times 10^{-4}$  | rs1881502  | 23.59  | JTI                |
| <b><i>MOB2</i></b>      | 11p15.5 | protein_coding | 0.04 | 0.81 (0.74-0.89) | $8.30 \times 10^{-6}$  | $6.19 \times 10^{-4}$  | rs1881502  | 14.97  | PrediXcan          |
|                         |         |                | 0.03 | 0.75 (0.68-0.83) | $2.10 \times 10^{-8}$  | $3.22 \times 10^{-6}$  | rs1881502  | 14.97  | Modified<br>UTMOST |
|                         |         |                | 0.09 | 0.78 (0.71-0.86) | $6.38 \times 10^{-7}$  | $6.69 \times 10^{-5}$  | rs1881502  | 14.97  | JTI                |
| <i>TOLLIP-AS1</i>       | 11p15.5 | lncRNA         | 0.05 | 0.93 (0.88-0.97) | $1.67 \times 10^{-3}$  | $4.31 \times 10^{-2}$  | rs1881502  | 175.58 | Modified<br>UTMOST |
| <i>GSTP1</i>            | 11q13.2 | protein_coding | 0.02 | 0.90 (0.86-0.96) | $4.51 \times 10^{-4}$  | $1.63 \times 10^{-2}$  | rs12785905 | 402.17 | JTI                |
| <i>NDUFV1</i>           | 11q13.2 | protein_coding | 0.14 | 1.08 (1.03-1.13) | $6.28 \times 10^{-4}$  | $2.11 \times 10^{-2}$  | rs12785905 | 428.04 | Modified<br>UTMOST |
|                         |         |                | 0.14 | 1.08 (1.03-1.12) | $9.85 \times 10^{-4}$  | $2.95 \times 10^{-2}$  | rs12785905 | 428.04 | JTI                |
| <i>NUDT8</i>            | 11q13.2 | protein_coding | 0.02 | 1.12 (1.05-1.2)  | $4.81 \times 10^{-4}$  | $1.72 \times 10^{-2}$  | rs12785905 | 445.44 | Modified<br>UTMOST |
| <i>RHOD</i>             | 11q13.2 | protein_coding | 0.29 | 1.05 (1.02-1.08) | $1.93 \times 10^{-3}$  | $4.78 \times 10^{-2}$  | rs12785905 | 112.48 | Modified<br>UTMOST |
|                         |         |                | 0.3  | 1.04 (1.02-1.07) | $1.97 \times 10^{-3}$  | $4.87 \times 10^{-2}$  | rs12785905 | 112.48 | JTI                |
| <i>AP003071.1</i>       | 11q13.3 | lncRNA         | 0.02 | 0.83 (0.79-0.88) | $2.36 \times 10^{-11}$ | $5.50 \times 10^{-9}$  | rs11228565 | 102.02 | JTI                |
| <b><i>LINC02701</i></b> | 11q13.3 | lncRNA         | 0.17 | 1.08 (1.04-1.12) | $5.44 \times 10^{-5}$  | $3.10 \times 10^{-3}$  | rs11228565 | 336.57 | PrediXcan          |
|                         |         |                | 0.16 | 1.07 (1.03-1.11) | $7.84 \times 10^{-5}$  | $4.20 \times 10^{-3}$  | rs11228565 | 336.57 | Modified<br>UTMOST |
|                         |         |                | 0.19 | 1.07 (1.03-1.1)  | $9.11 \times 10^{-5}$  | $4.66 \times 10^{-3}$  | rs11228565 | 336.57 | JTI                |
| <i>AP002360.1</i>       | 11q13.5 | lncRNA         | 0.02 | 1.43 (1.24-1.65) | $1.01 \times 10^{-6}$  | $9.83 \times 10^{-5}$  | rs11290954 | 104.84 | JTI                |
| <i>EMSY</i>             | 11q13.5 | protein_coding | 0.03 | 2.06 (1.7-2.49)  | $2.76 \times 10^{-13}$ | $8.36 \times 10^{-11}$ | rs11290954 | 3.526  | Modified<br>UTMOST |

|                   |                           |                |      |                  |                        |                        |            |         |                    |
|-------------------|---------------------------|----------------|------|------------------|------------------------|------------------------|------------|---------|--------------------|
|                   |                           |                | 0.07 | 1.81 (1.54-2.12) | $3.37 \times 10^{-13}$ | $1.01 \times 10^{-10}$ |            |         | JTI                |
| <i>HTR3A</i>      | 11q23.2                   | protein_coding | 0.02 | 0.2 (0.08-0.5)   | $6.49 \times 10^{-4}$  | $2.17 \times 10^{-2}$  | rs11214775 | 53.85   | JTI                |
| <i>FAM234B</i>    | 12p13.1                   | protein_coding | 0.06 | 0.93 (0.89-0.97) | $1.66 \times 10^{-3}$  | $4.31 \times 10^{-2}$  | rs2066827  | 424.36  | Modified<br>UTMOST |
|                   |                           |                | 0.11 | 0.91 (0.86-0.96) | $1.37 \times 10^{-3}$  | $3.75 \times 10^{-2}$  | rs2066827  | 424.36  | JTI                |
| <i>DUSP16</i>     | 12p13.2                   | protein_coding | 0.02 | 1.24 (1.09-1.41) | $1.33 \times 10^{-3}$  | $3.69 \times 10^{-2}$  | rs2066827  | 155.78  | JTI                |
| <i>AC004241.2</i> | 12q13.11                  | lncRNA         | 0.02 | 1.53 (1.19-1.96) | $8.47 \times 10^{-4}$  | $2.62 \times 10^{-2}$  | rs80130819 | 293.48  | Modified<br>UTMOST |
|                   |                           |                | 0.06 | 1.13 (1.05-1.21) | $6.36 \times 10^{-4}$  | $2.13 \times 10^{-2}$  | rs80130819 | 293.48  | JTI                |
| <i>ASB8</i>       | 12q13.11                  | protein_coding | 0.06 | 1.15 (1.07-1.23) | $6.37 \times 10^{-5}$  | $3.54 \times 10^{-3}$  | rs80130819 | 155.38  | Modified<br>UTMOST |
| <i>LMBR1L</i>     | 12q13.12                  | protein_coding | 0.06 | 0.87 (0.81-0.92) | $1.19 \times 10^{-5}$  | $8.48 \times 10^{-4}$  | rs10875943 | 171.33  | PrediXcan          |
|                   |                           |                | 0.07 | 0.87 (0.81-0.93) | $8.05 \times 10^{-5}$  | $4.26 \times 10^{-3}$  | rs10875943 | 171.33  | Modified<br>UTMOST |
|                   |                           |                | 0.09 | 0.86 (0.8-0.92)  | $5.90 \times 10^{-6}$  | $4.61 \times 10^{-4}$  | rs10875943 | 171.33  | JTI                |
| <i>TROAP</i>      | 12q13.12                  | protein_coding | 0.02 | 1.43 (1.27-1.61) | $8.38 \times 10^{-9}$  | $1.37 \times 10^{-6}$  | rs10875943 | 49.50   | JTI                |
| <i>AC011603.2</i> | 12q13.12                  | lncRNA         | 0.12 | 0.92 (0.9-0.95)  | $3.55 \times 10^{-7}$  | $3.98 \times 10^{-5}$  | rs10875943 | 134.358 | PrediXcan          |
|                   |                           |                | 0.16 | 0.91 (0.88-0.94) | $8.75 \times 10^{-7}$  | $8.69 \times 10^{-5}$  |            |         | Modified<br>UTMOST |
|                   |                           |                | 0.17 | 0.91 (0.87-0.94) | $7.19 \times 10^{-7}$  | $7.35 \times 10^{-5}$  |            |         | JTI                |
| <i>AC131212.1</i> | 12q24.33                  | lncRNA         | 0.03 | 1.14 (1.08-1.2)  | $1.49 \times 10^{-6}$  | $1.40 \times 10^{-4}$  | rs7295014  | 102.30  | PrediXcan          |
| <i>MZT1</i>       | 13q21.33 <sup>-22.1</sup> | protein_coding | 0.06 | 1.12 (1.04-1.19) | $1.58 \times 10^{-3}$  | $4.16 \times 10^{-2}$  | rs7327286  | 411.62  | JTI                |
| <i>HAUS4</i>      | 14q11.2                   | protein_coding | 0.31 | 1.04 (1.02-1.07) | $2.48 \times 10^{-4}$  | $1.04 \times 10^{-2}$  | rs1004030  | 120.72  | PrediXcan          |
|                   |                           |                | 0.34 | 1.03 (1.02-1.05) | $2.25 \times 10^{-4}$  | $9.51 \times 10^{-3}$  | rs1004030  | 120.72  | Modified<br>UTMOST |

|                   |         |                |      |                  |                       |                       |            |        |                    |
|-------------------|---------|----------------|------|------------------|-----------------------|-----------------------|------------|--------|--------------------|
|                   |         |                | 0.36 | 1.04 (1.02-1.06) | $1.90 \times 10^{-4}$ | $8.27 \times 10^{-3}$ | rs1004030  | 120.72 | JTI                |
| <i>RBM23</i>      | 14q11.2 | protein_coding | 0.31 | 0.96 (0.93-0.98) | $1.20 \times 10^{-3}$ | $3.43 \times 10^{-2}$ | rs1004030  | 82.74  | Modified<br>UTMOST |
| <i>SLC25A21</i>   | 14q13.3 | protein_coding | 0.02 | 0.68 (0.56-0.83) | $2.09 \times 10^{-4}$ | $8.95 \times 10^{-3}$ | rs11629412 | 9.34   | Modified<br>UTMOST |
|                   |         |                | 0.03 | 0.35 (0.21-0.56) | $1.48 \times 10^{-5}$ | $1.02 \times 10^{-3}$ | rs11629412 | 9.34   | JTI                |
| <i>ERO1A</i>      | 14q22.1 | protein_coding | 0.04 | 0.34 (0.23-0.49) | $1.12 \times 10^{-8}$ | $1.76 \times 10^{-6}$ | rs8008270  | 209.71 | Modified<br>UTMOST |
| <i>INAFM2</i>     | 15q15.1 | lncRNA         | 0.04 | 1.14 (1.05-1.24) | $1.29 \times 10^{-3}$ | $3.58 \times 10^{-2}$ | rs4924487  | 304.00 | Modified<br>UTMOST |
|                   |         |                | 0.06 | 1.09 (1.03-1.14) | $1.52 \times 10^{-3}$ | $4.07 \times 10^{-2}$ | rs4924487  | 304.00 | JTI                |
| <i>RPUSD2</i>     | 15q15.1 | protein_coding | 0.02 | 0.71 (0.58-0.86) | $7.21 \times 10^{-4}$ | $2.33 \times 10^{-2}$ | rs4924487  | 56.26  | JTI                |
| <i>AC018553.1</i> | 16q12.2 | lncRNA         | 0.08 | 0.91 (0.86-0.96) | $8.57 \times 10^{-4}$ | $2.65 \times 10^{-2}$ | rs13380763 | 351.97 | PrediXcan          |
| <i>IRX5</i>       | 16q12.2 | protein_coding | 0.06 | 0.91 (0.85-0.96) | $1.39 \times 10^{-3}$ | $3.80 \times 10^{-2}$ | rs13380763 | 286.47 | PrediXcan          |
| <i>AC010547.1</i> | 16q22.2 | lncRNA         | 0.09 | 1.24 (1.09-1.42) | $9.76 \times 10^{-4}$ | $2.93 \times 10^{-2}$ | rs12051443 | 191.49 | Modified<br>UTMOST |
|                   |         |                | 0.13 | 1.07 (1.03-1.12) | $1.21 \times 10^{-3}$ | $3.43 \times 10^{-2}$ | rs12051443 | 191.49 | JTI                |
| <i>LINC01229</i>  | 16q23.2 | lncRNA         | 0.05 | 1.36 (1.16-1.59) | $1.80 \times 10^{-4}$ | $7.95 \times 10^{-3}$ | rs28709974 | 137.63 | Modified<br>UTMOST |
| <i>AC005358.2</i> | 17p12   | lncRNA         | 0.04 | 0.81 (0.73-0.9)  | $5.39 \times 10^{-5}$ | $3.09 \times 10^{-3}$ | rs72811270 | 391.90 | Modified<br>UTMOST |
|                   |         |                | 0.07 | 0.82 (0.74-0.91) | $2.81 \times 10^{-4}$ | $1.14 \times 10^{-2}$ |            |        | JTI                |
| <i>CTCI</i>       | 17p13.1 | protein_coding | 0.06 | 0.9 (0.85-0.95)  | $1.86 \times 10^{-4}$ | $8.13 \times 10^{-3}$ | rs28441558 | 348.24 | Modified<br>UTMOST |
| <i>SAT2</i>       | 17p13.1 | protein_coding | 0.03 | 0.83 (0.75-0.92) | $4.88 \times 10^{-4}$ | $1.73 \times 10^{-2}$ | rs28441558 | 271.92 | PrediXcan          |



|                   |          |                |      |                  |                        |                        |             |        |                    |
|-------------------|----------|----------------|------|------------------|------------------------|------------------------|-------------|--------|--------------------|
| <i>TMEM102</i>    | 17p13.1  | protein_coding | 0.02 | 1.33 (1.14-1.56) | $3.48 \times 10^{-4}$  | $1.36 \times 10^{-2}$  | rs28441558  | 462.12 | JTI                |
| <i>MRM3</i>       | 17p13.3  | protein_coding | 0.04 | 1.51 (1.36-1.68) | $1.06 \times 10^{-14}$ | $3.89 \times 10^{-12}$ | rs461251    | 76.587 | Modified<br>UTMOST |
| <i>TLL6</i>       | 17q21.32 | protein_coding | 0.02 | 1.24 (1.14-1.34) | $2.15 \times 10^{-7}$  | $2.58 \times 10^{-5}$  | rs117576373 | 73.90  | Modified<br>UTMOST |
|                   |          |                | 0.03 | 1.11 (1.05-1.18) | $1.11 \times 10^{-4}$  | $5.48 \times 10^{-3}$  | rs117576373 | 73.90  | JTI                |
| <i>MKS1</i>       | 17q22    | protein_coding | 0.03 | 1.12 (1.04-1.2)  | $1.34 \times 10^{-3}$  | $3.70 \times 10^{-2}$  | rs2680708   | 159.15 | PrediXcan          |
|                   |          |                | 0.07 | 1.17 (1.07-1.28) | $7.55 \times 10^{-4}$  | $2.41 \times 10^{-2}$  | rs2680708   | 159.15 | Modified<br>UTMOST |
|                   |          |                | 0.08 | 1.16 (1.08-1.24) | $7.58 \times 10^{-5}$  | $4.09 \times 10^{-3}$  | rs2680708   | 159.15 | JTI                |
| <i>AC036176.1</i> | 18q21.33 | lncRNA         | 0.1  | 1.09 (1.04-1.15) | $8.08 \times 10^{-4}$  | $2.53 \times 10^{-2}$  | rs11381388  | 87.67  | Modified<br>UTMOST |
|                   |          |                | 0.09 | 1.08 (1.03-1.14) | $1.87 \times 10^{-3}$  | $4.68 \times 10^{-2}$  | rs11381388  | 87.67  | JTI                |
| <i>HAUS8</i>      | 19p13.11 | protein_coding | 0.05 | 1.12 (1.05-1.19) | $3.88 \times 10^{-4}$  | $1.47 \times 10^{-2}$  | rs11666569  | 27.64  | Modified<br>UTMOST |
|                   |          |                | 0.07 | 1.09 (1.04-1.15) | $4.14 \times 10^{-4}$  | $1.54 \times 10^{-2}$  | rs11666569  | 27.64  | JTI                |
| <i>AC011479.3</i> | 19q13.13 | lncRNA         | 0.03 | 1.09 (1.04-1.15) | $2.89 \times 10^{-4}$  | $1.17 \times 10^{-2}$  | rs8102476   | 58.71  | JTI                |
| <i>SIPAIL3</i>    | 19q13.13 | protein_coding | 0.12 | 1.07 (1.04-1.11) | $1.23 \times 10^{-5}$  | $8.67 \times 10^{-4}$  | rs8102476   | 36.60  | PrediXcan          |
|                   |          |                | 0.11 | 1.07 (1.04-1.11) | $8.35 \times 10^{-5}$  | $4.40 \times 10^{-3}$  | rs8102476   | 36.60  | JTI                |
| <i>ZNF781</i>     | 19q13.12 | protein_coding | 0.04 | 1.14 (1.06-1.23) | $3.69 \times 10^{-4}$  | $1.42 \times 10^{-2}$  | rs59710626  | 110.56 | PrediXcan          |
|                   |          |                | 0.09 | 1.07 (1.04-1.11) | $9.34 \times 10^{-5}$  | $4.76 \times 10^{-3}$  |             |        | Modified<br>UTMOST |
|                   |          |                | 0.13 | 1.06 (1.03-1.1)  | $9.45 \times 10^{-5}$  | $4.79 \times 10^{-3}$  |             |        | JTI                |
| <i>ZNF607</i>     | 19q13.12 | protein_coding | 0.07 | 0.88 (0.84-0.93) | $4.75 \times 10^{-6}$  | $3.94 \times 10^{-4}$  | rs59710626  | 337.40 | Modified<br>UTMOST |

|                   |          |                |      |                  |                        |                        |            |        |                    |
|-------------------|----------|----------------|------|------------------|------------------------|------------------------|------------|--------|--------------------|
| <i>AC022144.1</i> | 19q13.2  | lncRNA         | 0.08 | 1.11 (1.05-1.17) | $1.56 \times 10^{-4}$  | $7.22 \times 10^{-3}$  | rs12610267 | 485.77 | Modified<br>UTMOST |
| <i>CI9orf33</i>   | 19q13.2  | protein_coding | 0.04 | 1.12 (1.05-1.2)  | $1.40 \times 10^{-3}$  | $3.82 \times 10^{-2}$  | rs12610267 | 50.92  | PrediXcan          |
|                   |          |                | 0.06 | 1.24 (1.16-1.33) | $1.67 \times 10^{-10}$ | $3.35 \times 10^{-8}$  | rs12610267 | 50.92  | Modified<br>UTMOST |
| <i>CEACAM4</i>    | 19q13.2  | protein_coding | 0.09 | 1.09 (1.05-1.13) | $8.81 \times 10^{-6}$  | $6.53 \times 10^{-4}$  | rs74738513 | 147.51 | JTI                |
| <i>ERF</i>        | 19q13.2  | protein_coding | 0.03 | 0.88 (0.82-0.95) | $1.79 \times 10^{-3}$  | $4.51 \times 10^{-2}$  | rs61088131 | 58.36  | JTI                |
| <i>EXOSC5</i>     | 19q13.2  | protein_coding | 0.07 | 0.91 (0.86-0.96) | $8.84 \times 10^{-4}$  | $2.71 \times 10^{-2}$  | rs11672691 | 82.20  | Modified<br>UTMOST |
|                   |          |                | 0.09 | 0.9 (0.84-0.95)  | $6.27 \times 10^{-4}$  | $2.11 \times 10^{-2}$  | rs11672691 | 82.20  | JTI                |
| <i>KCNK6</i>      | 19q13.2  | protein_coding | 0.02 | 0.75 (0.65-0.87) | $8.75 \times 10^{-5}$  | $4.53 \times 10^{-3}$  | rs12610267 | 74.93  | JTI                |
| <i>LIP×10-AS1</i> | 19q13.2  | lncRNA         | 0.02 | 0.39 (0.24-0.66) | $4.58 \times 10^{-4}$  | $1.65 \times 10^{-2}$  | rs61088131 | 455.56 | JTI                |
| <i>TMEM91</i>     | 19q13.2  | protein_coding | 0.08 | 0.9 (0.86-0.95)  | $1.82 \times 10^{-4}$  | $8.02 \times 10^{-3}$  | rs11672691 | 95.60  | Modified<br>UTMOST |
|                   |          |                | 0.11 | 0.93 (0.9-0.97)  | $6.57 \times 10^{-4}$  | $2.18 \times 10^{-2}$  | rs11672691 | 95.60  | JTI                |
| <i>YIF1B</i>      | 19q13.2  | protein_coding | 0.05 | 0.89 (0.85-0.94) | $1.58 \times 10^{-5}$  | $1.08 \times 10^{-3}$  | rs12610267 | 63.18  | JTI                |
| <i>DMAC2</i>      | 19q13.2  | protein_coding | 0.05 | 1.18 (1.08-1.28) | $2.79 \times 10^{-4}$  | $1.14 \times 10^{-2}$  | rs11672691 | 38.965 | Modified<br>UTMOST |
| <i>LINC01480</i>  | 19q13.2  | lncRNA         | 0.03 | 0.84 (0.78-0.9)  | $2.36 \times 10^{-6}$  | $2.13 \times 10^{-4}$  | rs74738513 | 57.335 | Modified<br>UTMOST |
| <i>PCAT19</i>     | 19q13.2  | lncRNA         | 0.04 | 1.5 (1.38-1.64)  | $5.39 \times 10^{-20}$ | $3.04 \times 10^{-17}$ | rs11672691 | 20.972 | PrediXcan          |
|                   |          |                | 0.08 | 1.21 (1.16-1.26) | $3.76 \times 10^{-20}$ | $2.22 \times 10^{-17}$ |            |        | Modified<br>UTMOST |
|                   |          |                | 0.11 | 1.16 (1.12-1.19) | $6.81 \times 10^{-22}$ | $4.85 \times 10^{-19}$ |            |        | JTI                |
| <i>AC011473.3</i> | 19q13.41 | lncRNA         | 0.03 | 1.31 (1.17-1.45) | $1.00 \times 10^{-6}$  | $9.81 \times 10^{-5}$  | rs2735839  | 172.97 | PrediXcan          |

|                   |          |                |      |                  |                        |                       |            |        |                    |
|-------------------|----------|----------------|------|------------------|------------------------|-----------------------|------------|--------|--------------------|
|                   |          |                | 0.03 | 1.14 (1.07-1.21) | $2.60 \times 10^{-5}$  | $1.67 \times 10^{-3}$ | rs2735839  | 172.97 | JTI                |
| <i>KLK4</i>       | 19q13.41 | protein_coding | 0.02 | 1.37 (1.18-1.59) | $3.88 \times 10^{-5}$  | $2.35 \times 10^{-3}$ | rs2735839  | 49.37  | Modified<br>UTMOST |
| <i>EFCAB8</i>     | 20q11.21 | protein_coding | 0.02 | 1.16 (1.08-1.25) | $2.23 \times 10^{-5}$  | $1.46 \times 10^{-3}$ | rs11480453 | 201.49 | Modified<br>UTMOST |
|                   |          |                | 0.07 | 1.09 (1.03-1.16) | $1.79 \times 10^{-3}$  | $4.51 \times 10^{-2}$ | rs11480453 | 201.49 | JTI                |
| <i>AL121832.1</i> | 20q13.33 | lncRNA         | 0.03 | 1.18 (1.08-1.3)  | $3.66 \times 10^{-4}$  | $1.42 \times 10^{-2}$ | rs2427345  | 9.04   | Modified<br>UTMOST |
|                   |          |                | 0.05 | 1.12 (1.06-1.18) | $8.75 \times 10^{-5}$  | $4.53 \times 10^{-3}$ | rs2427345  | 9.04   | JTI                |
| <i>AL121845.4</i> | 20q13.33 | lncRNA         | 0.03 | 0.89 (0.85-0.94) | $4.12 \times 10^{-6}$  | $3.48 \times 10^{-4}$ | rs6062509  | 0.83   | JTI                |
| <i>FNDC11</i>     | 20q13.33 | protein_coding | 0.04 | 1.79 (1.26-2.53) | $1.17 \times 10^{-3}$  | $3.35 \times 10^{-2}$ | rs6062509  | 174.50 | Modified<br>UTMOST |
|                   |          |                | 0.04 | 1.08 (1.04-1.13) | $1.00 \times 10^{-4}$  | $5.00 \times 10^{-3}$ | rs6062509  | 174.50 | JTI                |
| <i>GATA5</i>      | 20q13.33 | protein_coding | 0.02 | 1.22 (1.08-1.38) | $1.76 \times 10^{-3}$  | $4.47 \times 10^{-2}$ | rs2427345  | 35.42  | Modified<br>UTMOST |
|                   |          |                | 0.03 | 1.1 (1.04-1.16)  | $1.40 \times 10^{-3}$  | $3.82 \times 10^{-2}$ | rs2427345  | 35.42  | JTI                |
| <i>HELZ2</i>      | 20q13.33 | protein_coding | 0.03 | 1.23 (1.13-1.34) | $3.15 \times 10^{-6}$  | $2.80 \times 10^{-4}$ | rs6062509  | 156.97 | JTI                |
| <i>LAMA5</i>      | 20q13.33 | protein_coding | 0.07 | 0.88 (0.83-0.94) | $9.76 \times 10^{-5}$  | $4.94 \times 10^{-3}$ | rs2427345  | 73.24  | Modified<br>UTMOST |
| <i>TNFRSF6B</i>   | 20q13.33 | protein_coding | 0.06 | 0.8 (0.72-0.89)  | $5.30 \times 10^{-5}$  | $3.05 \times 10^{-3}$ | rs6062509  | 32.53  | JTI                |
| <i>AL022476.1</i> | 22q13.2  | lncRNA         | 0.05 | 1.51 (1.33-1.72) | $3.38 \times 10^{-10}$ | $6.40 \times 10^{-8}$ | rs5759167  | 51.84  | Modified<br>UTMOST |
|                   |          |                | 0.07 | 1.26 (1.13-1.4)  | $2.19 \times 10^{-5}$  | $1.44 \times 10^{-3}$ | rs5759167  | 51.84  | JTI                |
| <i>FAM118A</i>    | 22q13.31 | protein_coding | 0.54 | 1.02 (1.01-1.04) | $1.64 \times 10^{-3}$  | $4.28 \times 10^{-2}$ | rs9615099  | 6.70   | JTI                |

Bold genes represent those supported by all three genetic prediction models (PrediXcan, modified UTMOST and JTI).

<sup>a</sup>  $R^2$ : prediction performance ( $R^2$ ) derived using GTEx data.  $P$  value: derived from association analyses of 79,194 cases and 61,112 controls; associations with FDR-corrected  $P$  value  $\leq 0.05$  considered significant;

<sup>b</sup> Risk SNPs identified in previous GWAS or fine-mapping studies. The risk SNP closest to the gene is presented.

lncRNA: long noncoding RNAs.

**Supplementary Table 4** Seventy-two genes that have been reported in previous TWAS showing the same directions of effect compared with the current study

| Gene             | Region | Classification | R <sup>2a</sup> | OR (95% CI)      | P-value                | P-value after FDR <sup>a</sup> | Closest risk SNPs <sup>b</sup> | Model              | PMID                 |
|------------------|--------|----------------|-----------------|------------------|------------------------|--------------------------------|--------------------------------|--------------------|----------------------|
| <i>ARNT</i>      | 1q21.3 | protein_coding | 0.14            | 0.94 (0.91-0.98) | 7.16×10 <sup>-4</sup>  | 2.32×10 <sup>-2</sup>          | rs17599629                     | Modified<br>UTMOST | 30287866             |
|                  |        |                | 0.14            | 0.93 (0.89-0.96) | 7.35×10 <sup>-5</sup>  | 3.98×10 <sup>-3</sup>          |                                | JTI                |                      |
| <i>ANXA9</i>     | 1q21.3 | protein_coding | 0.02            | 1.24 (1.15-1.34) | 1.58×10 <sup>-8</sup>  | 2.47×10 <sup>-6</sup>          | rs17599629                     | Modified<br>UTMOST | 30287866             |
| <i>CTSS</i>      | 1q21.3 | protein_coding | 0.2             | 0.96 (0.94-0.98) | 9.01×10 <sup>-4</sup>  | 2.75×10 <sup>-2</sup>          | rs17599629                     | JTI                | 30287866             |
|                  |        |                |                 |                  |                        |                                |                                |                    | 31101764             |
| <i>KCNN3</i>     | 1q21.3 | protein_coding | 0.03            | 0.78 (0.73-0.84) | 5.66×10 <sup>-11</sup> | 1.25×10 <sup>-8</sup>          | rs34579442                     | Modified<br>UTMOST | 30287866<br>31101764 |
|                  |        |                |                 |                  |                        |                                |                                |                    |                      |
| <i>ADAM15</i>    | 1q22   | protein_coding | 0.02            | 1.35 (1.23-1.48) | 1.59×10 <sup>-10</sup> | 3.23×10 <sup>-8</sup>          | rs4845695                      | PrediXcan          | 30287866             |
|                  |        |                | 0.05            | 1.23 (1.16-1.3)  | 1.94×10 <sup>-11</sup> | 4.57×10 <sup>-9</sup>          |                                | JTI                |                      |
| <i>DCST1-AS1</i> | 1q22   | lncRNA         | 0.02            | 0.75 (0.68-0.83) | 9.24×10 <sup>-8</sup>  | 1.21×10 <sup>-5</sup>          | rs4845695                      | Modified<br>UTMOST | 30287866             |
|                  |        |                | 0.04            | 0.81 (0.75-0.88) | 4.23×10 <sup>-7</sup>  | 4.64×10 <sup>-5</sup>          |                                | JTI                | 31101764             |
| <i>MDM4</i>      | 1q32.1 | protein_coding | 0.04            | 0.67 (0.62-0.73) | 1.66×10 <sup>-21</sup> | 1.12×10 <sup>-18</sup>         | rs4845695                      | PrediXcan          | 30287866             |

|                       |        |                |      |                  |                        |                        |            |                    |          |
|-----------------------|--------|----------------|------|------------------|------------------------|------------------------|------------|--------------------|----------|
|                       |        |                | 0.06 | 0.63 (0.57-0.7)  | $3.02 \times 10^{-18}$ | $1.56 \times 10^{-15}$ |            | Modified<br>UTMOST |          |
|                       |        |                | 0.09 | 0.66 (0.59-0.73) | $3.92 \times 10^{-14}$ | $1.32 \times 10^{-11}$ |            | JTI                |          |
| <b><i>RAB29</i></b>   | 1q32.1 | protein_coding | 0.13 | 0.92 (0.89-0.95) | $1.80 \times 10^{-6}$  | $1.67 \times 10^{-4}$  | rs4245739  | PrediXcan          | 30287866 |
|                       |        |                | 0.19 | 0.91 (0.88-0.94) | $2.29 \times 10^{-10}$ | $4.44 \times 10^{-8}$  |            | Modified<br>UTMOST | 31101764 |
|                       |        |                | 0.21 | 0.92 (0.89-0.95) | $6.94 \times 10^{-8}$  | $9.29 \times 10^{-6}$  |            | JTI                |          |
| <b><i>SLC41A1</i></b> | 1q32.1 | protein_coding | 0.03 | 0.82 (0.77-0.88) | $2.63 \times 10^{-8}$  | $3.93 \times 10^{-6}$  | rs1775148  | Modified<br>UTMOST | 30287866 |
|                       |        |                | 0.04 | 0.82 (0.77-0.87) | $3.10 \times 10^{-9}$  | $5.33 \times 10^{-7}$  |            | JTI                |          |
| <b><i>GGCX</i></b>    | 2p11.2 | protein_coding | 0.12 | 0.87 (0.85-0.9)  | $6.42 \times 10^{-16}$ | $2.55 \times 10^{-13}$ | rs2028900  | PrediXcan          | 30287866 |
|                       |        |                | 0.18 | 0.84 (0.81-0.87) | $2.17 \times 10^{-23}$ | $1.88 \times 10^{-20}$ |            | Modified<br>UTMOST | 31101764 |
|                       |        |                | 0.2  | 0.84 (0.81-0.87) | $5.39 \times 10^{-21}$ | $3.35 \times 10^{-18}$ |            | JTI                |          |
| <b><i>WDPCP</i></b>   | 2p15   | protein_coding | 0.05 | 1.38 (1.29-1.48) | $5.57 \times 10^{-20}$ | $3.07 \times 10^{-17}$ | rs58235267 | PrediXcan          | 31101764 |
|                       |        |                | 0.09 | 1.25 (1.2-1.3)   | $2.18 \times 10^{-26}$ | $3.30 \times 10^{-23}$ |            | Modified<br>UTMOST | 30287866 |
|                       |        |                | 0.11 | 1.38 (1.3-1.47)  | $1.51 \times 10^{-24}$ | $1.46 \times 10^{-21}$ |            | JTI                |          |

|                      |        |                |      |                  |                        |                        |            |                    |          |
|----------------------|--------|----------------|------|------------------|------------------------|------------------------|------------|--------------------|----------|
| <b><i>NOL10</i></b>  | 2p25.1 | protein_coding | 0.04 | 0.89 (0.84-0.94) | $1.12 \times 10^{-4}$  | $5.48 \times 10^{-3}$  | rs9287719  | PrediXcan          | 30287866 |
|                      |        |                | 0.04 | 0.79 (0.74-0.84) | $1.69 \times 10^{-13}$ | $5.25 \times 10^{-11}$ |            | Modified<br>UTMOST |          |
|                      |        |                | 0.04 | 0.16 (0.09-0.29) | $9.10 \times 10^{-10}$ | $1.62 \times 10^{-7}$  |            | JTI                |          |
| <b><i>FLACCI</i></b> | 2q33.1 | protein_coding | 0.09 | 0.89 (0.85-0.93) | $8.86 \times 10^{-7}$  | $8.77 \times 10^{-5}$  | rs59308963 | PrediXcan          | 30287866 |
|                      |        |                | 0.13 | 0.90 (0.87-0.94) | $2.32 \times 10^{-8}$  | $3.51 \times 10^{-6}$  |            | Modified<br>UTMOST | 31101764 |
|                      |        |                | 0.14 | 0.92 (0.9-0.95)  | $2.99 \times 10^{-7}$  | $3.39 \times 10^{-5}$  |            | JTI                |          |
| <b><i>CHMP2B</i></b> | 3p11.2 | protein_coding | 0.06 | 1.35 (1.27-1.43) | $2.82 \times 10^{-24}$ | $2.63 \times 10^{-21}$ | rs2088396  | PrediXcan          | 31308362 |
|                      |        |                | 0.07 | 1.42 (1.32-1.53) | $6.31 \times 10^{-22}$ | $4.63 \times 10^{-19}$ |            | Modified<br>UTMOST | 31101764 |
|                      |        |                | 0.1  | 1.2 (1.15-1.25)  | $3.24 \times 10^{-18}$ | $1.64 \times 10^{-15}$ |            | JTI                | 30287866 |
| <b><i>POUIF1</i></b> | 3p11.2 | protein_coding | 0.04 | 1.51 (1.37-1.66) | $1.84 \times 10^{-16}$ | $8.26 \times 10^{-14}$ | rs2088396  | Modified<br>UTMOST | 31101764 |
|                      |        |                | 0.06 | 1.13 (1.07-1.18) | $4.91 \times 10^{-6}$  | $4.03 \times 10^{-4}$  |            | JTI                |          |
| <b><i>SIDT1</i></b>  | 3q13.2 | protein_coding | 0.05 | 0.84 (0.79-0.9)  | $7.42 \times 10^{-8}$  | $9.83 \times 10^{-6}$  | rs1283104  | PrediXcan          | 30287866 |
|                      |        |                | 0.03 | 0.56 (0.49-0.65) | $3.10 \times 10^{-16}$ | $1.32 \times 10^{-13}$ |            | Modified<br>UTMOST | 31101764 |

|                        |         |                |      |                  |                        |                        |             |                    |          |
|------------------------|---------|----------------|------|------------------|------------------------|------------------------|-------------|--------------------|----------|
|                        |         |                | 0.04 | 0.58 (0.52-0.65) | $4.36 \times 10^{-20}$ | $2.52 \times 10^{-17}$ |             | JTI                |          |
| <b><i>RUVBL1</i></b>   | 3q21.3  | protein_coding | 0.07 | 1.22 (1.16-1.29) | $1.40 \times 10^{-14}$ | $5.06 \times 10^{-12}$ | rs4857837   | PrediXcan          | 30287866 |
|                        |         |                | 0.07 | 1.33 (1.22-1.46) | $8.48 \times 10^{-10}$ | $1.52 \times 10^{-7}$  |             | Modified<br>UTMOST |          |
|                        |         |                | 0.08 | 1.36 (1.24-1.49) | $8.18 \times 10^{-11}$ | $1.75 \times 10^{-8}$  |             | JTI                |          |
| <b><i>DHX36</i></b>    | 3q25.2  | protein_coding | 0.16 | 0.93 (0.9-0.97)  | $1.20 \times 10^{-4}$  | $5.89 \times 10^{-3}$  | rs182314334 | PrediXcan          | 31101764 |
|                        |         |                | 0.15 | 0.93 (0.89-0.96) | $3.49 \times 10^{-5}$  | $2.14 \times 10^{-3}$  |             | Modified<br>UTMOST |          |
|                        |         |                | 0.18 | 0.95 (0.92-0.97) | $1.70 \times 10^{-4}$  | $7.62 \times 10^{-3}$  |             | JTI                |          |
| <b><i>PRKCI</i></b>    | 3q26.2  | protein_coding | 0.02 | 1.15 (1.08-1.22) | $5.17 \times 10^{-6}$  | $4.19 \times 10^{-4}$  | rs71277158  | JTI                | 30287866 |
| <b><i>BMPRI1B</i></b>  | 4q22.3  | protein_coding | 0.05 | 0.65 (0.6-0.71)  | $4.14 \times 10^{-23}$ | $3.34 \times 10^{-20}$ | rs17021918  | PrediXcan          | 30287866 |
|                        |         |                | 0.04 | 0.67 (0.6-0.73)  | $1.44 \times 10^{-16}$ | $6.59 \times 10^{-14}$ |             | Modified<br>UTMOST |          |
|                        |         |                | 0.04 | 0.71 (0.67-0.76) | $3.97 \times 10^{-23}$ | $3.32 \times 10^{-20}$ |             | JTI                |          |
| <b><i>UHRF1BP1</i></b> | 6p21.31 | protein_coding | 0.17 | 1.1 (1.06-1.14)  | $1.70 \times 10^{-7}$  | $2.10 \times 10^{-5}$  | rs9469899   | PrediXcan          | 31101764 |
|                        |         |                | 0.19 | 1.09 (1.06-1.12) | $2.45 \times 10^{-8}$  | $3.69 \times 10^{-6}$  |             | Modified<br>UTMOST | 30287866 |



|                     |         |                |      |                  |                       |                       |           |                    |          |
|---------------------|---------|----------------|------|------------------|-----------------------|-----------------------|-----------|--------------------|----------|
|                     |         |                | 0.24 | 1.06 (1.04-1.08) | $1.59 \times 10^{-8}$ | $2.47 \times 10^{-6}$ |           | JTI                |          |
| <b><i>AGER</i></b>  | 6p21.32 | protein_coding | 0.07 | 0.86 (0.81-0.91) | $2.79 \times 10^{-7}$ | $3.24 \times 10^{-5}$ | rs3096702 | PrediXcan          | 31101764 |
|                     |         |                | 0.14 | 0.91 (0.88-0.94) | $5.67 \times 10^{-7}$ | $6.05 \times 10^{-5}$ |           | Modified<br>UTMOST |          |
|                     |         |                | 0.16 | 0.89 (0.86-0.93) | $2.38 \times 10^{-7}$ | $2.83 \times 10^{-5}$ |           | JTI                |          |
| <i>HLA-DPA1</i>     | 6p21.32 | protein_coding | 0.03 | 1.14 (1.05-1.23) | $1.41 \times 10^{-3}$ | $3.84 \times 10^{-2}$ | rs9296068 | Modified<br>UTMOST | 31101764 |
|                     |         |                | 0.04 | 1.17 (1.1-1.24)  | $2.74 \times 10^{-7}$ | $3.19 \times 10^{-5}$ |           | JTI                |          |
| <i>HLA-DRB5</i>     | 6p21.32 | protein_coding | 0.66 | 1.04 (1.02-1.06) | $7.15 \times 10^{-5}$ | $3.90 \times 10^{-3}$ | rs3129859 | Modified<br>UTMOST | 31101764 |
| <b><i>RNF5</i></b>  | 6p21.32 | protein_coding | 0.04 | 1.19 (1.1-1.28)  | $5.94 \times 10^{-6}$ | $4.63 \times 10^{-4}$ | rs3096702 | PrediXcan          | 31101764 |
|                     |         |                | 0.09 | 1.1 (1.06-1.15)  | $5.05 \times 10^{-6}$ | $4.11 \times 10^{-4}$ |           | Modified<br>UTMOST |          |
|                     |         |                | 0.12 | 1.13 (1.08-1.19) | $4.07 \times 10^{-7}$ | $4.50 \times 10^{-5}$ |           | JTI                |          |
| <i>APOM</i>         | 6p21.33 | protein_coding | 0.05 | 1.31 (1.16-1.48) | $1.17 \times 10^{-5}$ | $8.39 \times 10^{-4}$ | rs2596546 | JTI                | 31101764 |
| <b><i>ATF6B</i></b> | 6p21.33 | protein_coding | 0.03 | 1.17 (1.09-1.26) | $2.67 \times 10^{-5}$ | $1.71 \times 10^{-3}$ | rs3096702 | PrediXcan          | 31101764 |
|                     |         |                | 0.12 | 1.07 (1.03-1.12) | $5.92 \times 10^{-4}$ | $2.01 \times 10^{-2}$ |           | Modified           |          |

|                |         |                |      |                  |                       |                       |            |                    |          |
|----------------|---------|----------------|------|------------------|-----------------------|-----------------------|------------|--------------------|----------|
|                |         |                |      |                  |                       |                       |            | UTMOST             |          |
|                |         |                | 0.13 | 1.07 (1.04-1.1)  | $3.60 \times 10^{-5}$ | $2.19 \times 10^{-3}$ |            | JTI                |          |
| <b>C4A</b>     | 6p21.33 | protein_coding | 0.24 | 1.07 (1.04-1.09) | $1.91 \times 10^{-7}$ | $2.34 \times 10^{-5}$ | rs3096702  | PrediXcan          | 31101764 |
|                |         |                | 0.25 | 1.09 (1.06-1.12) | $4.31 \times 10^{-8}$ | $6.22 \times 10^{-6}$ |            | Modified<br>UTMOST |          |
|                |         |                | 0.32 | 1.06 (1.04-1.08) | $2.64 \times 10^{-7}$ | $3.11 \times 10^{-5}$ |            | JTI                |          |
| <b>CYP21A2</b> | 6p21.33 | protein_coding | 0.19 | 0.92 (0.88-0.95) | $5.35 \times 10^{-6}$ | $4.29 \times 10^{-4}$ | rs3096702  | PrediXcan          | 31101764 |
|                |         |                | 0.14 | 0.9 (0.86-0.93)  | $6.39 \times 10^{-8}$ | $8.60 \times 10^{-6}$ |            | Modified<br>UTMOST |          |
|                |         |                | 0.19 | 0.92 (0.87-0.96) | $4.75 \times 10^{-4}$ | $1.70 \times 10^{-2}$ |            | JTI                |          |
| <b>FKBP1</b>   | 6p21.33 | protein_coding | 0.02 | 0.35 (0.2-0.61)  | $2.21 \times 10^{-4}$ | $9.42 \times 10^{-3}$ | rs3096702  | Modified<br>UTMOST | 31101764 |
| <b>FLOT1</b>   | 6p21.33 | protein_coding | 0.17 | 0.93 (0.9-0.95)  | $1.78 \times 10^{-7}$ | $2.19 \times 10^{-5}$ | rs12665339 | PrediXcan          | 31308362 |
|                |         |                | 0.16 | 0.92 (0.89-0.96) | $4.96 \times 10^{-6}$ | $4.06 \times 10^{-4}$ |            | Modified<br>UTMOST |          |
|                |         |                | 0.19 | 0.93 (0.91-0.96) | $3.62 \times 10^{-7}$ | $4.04 \times 10^{-5}$ |            | JTI                |          |
| <b>HCG22</b>   | 6p21.33 | lncRNA         | 0.05 | 1.15 (1.1-1.2)   | $9.47 \times 10^{-9}$ | $1.51 \times 10^{-6}$ | rs130067   | Modified           | 31101764 |

|                 |         |                |      |                  |                        |                       |            |                    |          |
|-----------------|---------|----------------|------|------------------|------------------------|-----------------------|------------|--------------------|----------|
|                 |         |                |      |                  |                        |                       |            | UTMOST             |          |
|                 |         |                | 0.06 | 1.24 (1.15-1.33) | $4.85 \times 10^{-8}$  | $6.83 \times 10^{-6}$ |            | JTI                |          |
|                 |         |                | 0.02 | 1.75 (1.47-2.08) | $3.34 \times 10^{-10}$ | $6.37 \times 10^{-8}$ |            | Modified<br>UTMOST |          |
| <i>HCP5</i>     | 6p21.33 | lncRNA         | 0.05 | 1.49 (1.29-1.72) | $9.50 \times 10^{-8}$  | $1.24 \times 10^{-5}$ | rs2596546  | JTI                | 31101764 |
| <i>LY6G5C</i>   | 6p21.33 | protein_coding | 0.09 | 1.09 (1.04-1.13) | $1.31 \times 10^{-4}$  | $6.29 \times 10^{-3}$ | rs2596546  | PrediXcan          | 31308362 |
|                 |         |                | 0.14 | 1.08 (1.05-1.12) | $1.11 \times 10^{-5}$  | $7.98 \times 10^{-4}$ |            | Modified<br>UTMOST |          |
|                 |         |                | 0.13 | 1.07 (1.04-1.11) | $5.55 \times 10^{-5}$  | $3.15 \times 10^{-3}$ |            | JTI                |          |
| <i>PPP1R18</i>  | 6p21.33 | protein_coding | 0.04 | 4.18 (2.7-6.48)  | $2.00 \times 10^{-10}$ | $3.94 \times 10^{-8}$ | rs12665339 | Modified<br>UTMOST | 31101764 |
|                 |         |                | 0.09 | 1.15 (1.1-1.2)   | $3.93 \times 10^{-9}$  | $6.71 \times 10^{-7}$ |            | JTI                |          |
| <i>PSORS1C3</i> | 6p21.33 | lncRNA         | 0.51 | 1.02 (1.01-1.04) | $1.66 \times 10^{-3}$  | $4.31 \times 10^{-2}$ | rs130067   | PrediXcan          | 31308362 |
|                 |         |                | 0.5  | 1.05 (1.02-1.07) | $4.23 \times 10^{-5}$  | $2.53 \times 10^{-3}$ |            | Modified<br>UTMOST |          |
|                 |         |                | 0.57 | 1.03 (1.01-1.05) | $1.34 \times 10^{-4}$  | $6.42 \times 10^{-3}$ |            | JTI                |          |
| <i>VAR2</i>     | 6p21.33 | protein_coding | 0.44 | 1.05 (1.03-1.07) | $6.49 \times 10^{-7}$  | $6.78 \times 10^{-5}$ | rs12665339 | PrediXcan          | 31101764 |

|                |        |                |      |                  |                        |                        |           |                    |          |
|----------------|--------|----------------|------|------------------|------------------------|------------------------|-----------|--------------------|----------|
|                |        |                | 0.43 | 1.06 (1.03-1.08) | $2.99 \times 10^{-7}$  | $3.39 \times 10^{-5}$  |           | Modified<br>UTMOST |          |
|                |        |                | 0.47 | 1.05 (1.03-1.07) | $1.05 \times 10^{-7}$  | $1.35 \times 10^{-5}$  |           | JTI                |          |
| <i>ZNRD1</i>   | 6p22.1 | protein_coding | 0.06 | 1.11 (1.06-1.17) | $3.33 \times 10^{-6}$  | $2.94 \times 10^{-4}$  | rs7767188 | PrediXcan          | 31101764 |
|                |        |                | 0.13 | 1.18 (1.12-1.23) | $1.43 \times 10^{-10}$ | $2.99 \times 10^{-8}$  |           | Modified<br>UTMOST |          |
|                |        |                | 0.14 | 1.1 (1.06-1.14)  | $1.15 \times 10^{-6}$  | $1.11 \times 10^{-4}$  |           | JTI                |          |
| <i>SESNI</i>   | 6q21   | protein_coding | 0.02 | 1.27 (1.18-1.37) | $2.34 \times 10^{-9}$  | $4.05 \times 10^{-7}$  | rs2273669 | PrediXcan          | 30287866 |
|                |        |                | 0.09 | 2.2 (1.71-2.84)  | $1.46 \times 10^{-9}$  | $2.55 \times 10^{-7}$  |           | JTI                |          |
| <i>ACAT2</i>   | 6q25.3 | protein_coding | 0.04 | 0.73 (0.67-0.8)  | $5.65 \times 10^{-11}$ | $1.25 \times 10^{-8}$  | rs651164  | Modified<br>UTMOST | 30287866 |
|                |        |                | 0.03 | 0.72 (0.65-0.79) | $1.07 \times 10^{-10}$ | $2.26 \times 10^{-8}$  |           | JTI                |          |
| <i>PNLDC1</i>  | 6q25.3 | protein_coding | 0.12 | 0.88 (0.83-0.94) | $7.76 \times 10^{-5}$  | $4.17 \times 10^{-3}$  | rs651164  | PrediXcan          | 30287866 |
|                |        |                | 0.08 | 0.84 (0.79-0.89) | $7.68 \times 10^{-10}$ | $1.39 \times 10^{-7}$  |           | Modified<br>UTMOST | 31101764 |
|                |        |                | 0.13 | 0.87 (0.82-0.92) | $5.42 \times 10^{-7}$  | $5.84 \times 10^{-5}$  |           | JTI                |          |
| <i>SLC22A2</i> | 6q25.3 | protein_coding | 0.05 | 0.73 (0.68-0.79) | $3.92 \times 10^{-16}$ | $1.61 \times 10^{-13}$ | rs4646284 | PrediXcan          | 30287866 |

|                |        |                |      |                  |                         |                         |             |                    |                      |
|----------------|--------|----------------|------|------------------|-------------------------|-------------------------|-------------|--------------------|----------------------|
|                |        |                | 0.12 | 0.63 (0.59-0.69) | $3.01 \times 10^{-29}$  | $5.61 \times 10^{-26}$  |             | Modified<br>UTMOST | 31308362             |
|                |        |                | 0.08 | 0.46 (0.39-0.53) | $1.01 \times 10^{-24}$  | $1.02 \times 10^{-21}$  |             | JTI                |                      |
| <i>SLC22A3</i> | 6q25.3 | protein_coding | 0.06 | 0.45 (0.42-0.49) | $9.09 \times 10^{-103}$ | $7.34 \times 10^{-99}$  | rs4646284   | PrediXcan          | 30287866             |
|                |        |                | 0.05 | 0.37 (0.34-0.4)  | $2.92 \times 10^{-112}$ | $3.54 \times 10^{-108}$ |             | JTI                | 31308362<br>31101764 |
| <i>WTAP</i>    | 6q25.3 | protein_coding | 0.08 | 0.8 (0.77-0.84)  | $3.00 \times 10^{-21}$  | $1.97 \times 10^{-18}$  | rs651164    | PrediXcan          | 30287866             |
|                |        |                | 0.13 | 0.79 (0.73-0.86) | $8.46 \times 10^{-9}$   | $1.38 \times 10^{-6}$   |             | Modified<br>UTMOST | 31101764             |
|                |        |                | 0.15 | 0.89 (0.87-0.92) | $5.11 \times 10^{-14}$  | $1.67 \times 10^{-11}$  |             | JTI                |                      |
| <i>HIBADH</i>  | 7p15.2 | protein_coding | 0.03 | 0.87 (0.83-0.92) | $3.97 \times 10^{-6}$   | $3.36 \times 10^{-4}$   | rs200362064 | PrediXcan          | 30287866             |
|                |        |                | 0.06 | 0.9 (0.86-0.94)  | $1.23 \times 10^{-5}$   | $8.67 \times 10^{-4}$   |             | JTI                |                      |
| <i>BHLHA15</i> | 7q21.3 | protein_coding | 0.05 | 1.38 (1.31-1.45) | $9.80 \times 10^{-35}$  | $2.38 \times 10^{-31}$  | rs6465657   | Modified<br>UTMOST | 31308362             |
|                |        |                | 0.06 | 1.61 (1.5-1.73)  | $7.61 \times 10^{-41}$  | $3.07 \times 10^{-37}$  |             | JTI                | 30287866<br>31101764 |
| <i>TECPRI</i>  | 7q21.3 | protein_coding | 0.06 | 2.09 (1.75-2.49) | $3.09 \times 10^{-16}$  | $1.32 \times 10^{-13}$  | rs6465657   | Modified           | 30287866             |

|                |          |                |      |                  |                        |                        |            |                    |          |
|----------------|----------|----------------|------|------------------|------------------------|------------------------|------------|--------------------|----------|
|                |          |                |      |                  |                        |                        |            | UTMOST             |          |
| <i>POU5F1B</i> | 8q24.21  | protein_coding | 0.04 | 1.31 (1.23-1.4)  | $4.88 \times 10^{-16}$ | $1.97 \times 10^{-13}$ | rs6983267  | Modified<br>UTMOST | 31308362 |
|                |          |                | 0.06 | 1.51 (1.27-1.8)  | $3.49 \times 10^{-6}$  | $3.04 \times 10^{-4}$  |            | JTI                |          |
| <i>USP20</i>   | 9q34.11  | protein_coding | 0.04 | 1.25 (1.15-1.35) | $7.17 \times 10^{-8}$  | $9.55 \times 10^{-6}$  | rs1182     | Modified<br>UTMOST | 31101764 |
|                |          |                | 0.05 | 1.19 (1.12-1.27) | $1.12 \times 10^{-7}$  | $1.44 \times 10^{-5}$  |            | JTI                |          |
| <i>ARL3</i>    | 10q24.32 | protein_coding | 0.05 | 0.87 (0.82-0.91) | $1.15 \times 10^{-7}$  | $1.47 \times 10^{-5}$  | rs34032774 | JTI                | 30287866 |
| <i>WBP1L</i>   | 10q24.32 | protein_coding | 0.02 | 0.8 (0.75-0.87)  | $1.03 \times 10^{-8}$  | $1.63 \times 10^{-6}$  | rs34032774 | JTI                | 31101764 |
| <i>CTBP2</i>   | 10q26.13 | protein_coding | 0.08 | 1.09 (1.05-1.13) | $1.29 \times 10^{-6}$  | $1.24 \times 10^{-4}$  | rs4962416  | PrediXcan          | 31308362 |
|                |          |                | 0.04 | 1.18 (1.1-1.27)  | $5.77 \times 10^{-6}$  | $4.53 \times 10^{-4}$  |            | JTI                | 30287866 |
| <i>RAD9A</i>   | 11q13.2  | protein_coding | 0.1  | 1.11 (1.07-1.16) | $1.17 \times 10^{-6}$  | $1.13 \times 10^{-4}$  | rs12785905 | PrediXcan          | 31101764 |
|                |          |                | 0.17 | 1.12 (1.07-1.16) | $2.84 \times 10^{-7}$  | $3.28 \times 10^{-5}$  |            | Modified<br>UTMOST |          |
|                |          |                | 0.19 | 1.1 (1.06-1.14)  | $7.82 \times 10^{-7}$  | $7.89 \times 10^{-5}$  |            | JTI                |          |
| <i>TPCN2</i>   | 11q13.3  | protein_coding | 0.13 | 1.21 (1.15-1.26) | $2.18 \times 10^{-16}$ | $9.61 \times 10^{-14}$ | rs11228565 | PrediXcan          | 30287866 |
|                |          |                | 0.09 | 1.27 (1.22-1.32) | $6.82 \times 10^{-37}$ | $2.36 \times 10^{-33}$ |            | Modified           |          |

|                 |          |                |      |                  |                        |                        |             |                    |          |
|-----------------|----------|----------------|------|------------------|------------------------|------------------------|-------------|--------------------|----------|
|                 |          |                |      |                  |                        |                        |             | UTMOST             |          |
|                 |          |                | 0.13 | 1.48 (1.39-1.58) | $3.87 \times 10^{-32}$ | $8.53 \times 10^{-29}$ |             | JTI                |          |
| <b>MMP7</b>     | 11q22.2  | protein_coding | 0.14 | 1.15 (1.11-1.19) | $1.32 \times 10^{-13}$ | $4.16 \times 10^{-11}$ | rs11568818  | PrediXcan          | 30287866 |
|                 |          |                | 0.14 | 1.31 (1.24-1.38) | $1.38 \times 10^{-20}$ | $8.36 \times 10^{-18}$ |             | Modified<br>UTMOST | 31101764 |
|                 |          |                | 0.11 | 1.15 (1.11-1.19) | $1.00 \times 10^{-13}$ | $3.19 \times 10^{-11}$ |             | JTI                |          |
| <b>TM7SF3</b>   | 12p11.23 | protein_coding | 0.14 | 1.07 (1.02-1.11) | $1.55 \times 10^{-3}$  | $4.11 \times 10^{-2}$  | rs10845938  | PrediXcan          | 30287866 |
|                 |          |                | 0.2  | 1.06 (1.03-1.09) | $4.68 \times 10^{-4}$  | $1.68 \times 10^{-2}$  |             | Modified<br>UTMOST |          |
|                 |          |                | 0.22 | 1.04 (1.02-1.07) | $5.76 \times 10^{-4}$  | $1.96 \times 10^{-2}$  |             | JTI                |          |
| <b>DIS3L</b>    | 15q22.31 | protein_coding | 0.17 | 1.06 (1.02-1.1)  | $1.71 \times 10^{-3}$  | $4.40 \times 10^{-2}$  | rs112293876 | Modified<br>UTMOST | 30287866 |
| <b>MPHOSPH6</b> | 16q23.3  | protein_coding | 0.1  | 1.09 (1.04-1.13) | $9.79 \times 10^{-5}$  | $4.94 \times 10^{-3}$  | rs199737822 | Modified<br>UTMOST | 30287866 |
|                 |          |                | 0.13 | 1.06 (1.02-1.09) | $5.85 \times 10^{-4}$  | $1.99 \times 10^{-2}$  |             | JTI                |          |
| <b>DDX52</b>    | 17q12    | protein_coding | 0.03 | 1.2 (1.12-1.28)  | $6.32 \times 10^{-8}$  | $8.60 \times 10^{-6}$  | rs2229295   | PrediXcan          | 31101764 |
| <b>SYNRG</b>    | 17q12    | protein_coding | 0.36 | 0.96 (0.93-0.98) | $4.93 \times 10^{-4}$  | $1.75 \times 10^{-2}$  | rs2229295   | PrediXcan          | 30287866 |

|                        |          |                |      |                   |                         |                         |            |                    |          |
|------------------------|----------|----------------|------|-------------------|-------------------------|-------------------------|------------|--------------------|----------|
|                        |          |                | 0.39 | 0.97 (0.95-0.99)  | $6.89 \times 10^{-4}$   | $2.26 \times 10^{-2}$   |            | Modified<br>UTMOST |          |
|                        |          |                | 0.39 | 0.96 (0.94-0.98)  | $6.67 \times 10^{-4}$   | $2.20 \times 10^{-2}$   |            | JTI                |          |
| <i>HNF1B</i>           | 17q12    | protein_coding | 0.03 | 61.4 (43.9-85.87) | $1.46 \times 10^{-126}$ | $3.54 \times 10^{-122}$ | rs2229295  | JTI                | 31308362 |
| <i>EIF3K</i>           | 19q13.2  | protein_coding | 0.02 | 0.66 (0.55-0.79)  | $6.07 \times 10^{-6}$   | $4.70 \times 10^{-4}$   | rs12610267 | Modified<br>UTMOST | 31101764 |
|                        |          |                | 0.04 | 0.82 (0.74-0.91)  | $1.69 \times 10^{-4}$   | $7.59 \times 10^{-3}$   |            | JTI                |          |
| <b><i>PPP1R14A</i></b> | 19q13.2  | protein_coding | 0.11 | 1.24 (1.19-1.29)  | $2.90 \times 10^{-25}$  | $3.20 \times 10^{-22}$  | rs12610267 | PrediXcan          | 31308362 |
|                        |          |                | 0.14 | 1.35 (1.28-1.41)  | $9.78 \times 10^{-35}$  | $2.38 \times 10^{-31}$  |            | Modified<br>UTMOST | 31101764 |
|                        |          |                | 0.18 | 1.2 (1.16-1.24)   | $5.04 \times 10^{-30}$  | $1.02 \times 10^{-26}$  |            | JTI                | 30287866 |
| <i>COMMD7</i>          | 20q11.21 | protein_coding | 0.05 | 0.81 (0.74-0.89)  | $3.74 \times 10^{-6}$   | $3.21 \times 10^{-4}$   | rs11480453 | JTI                | 31101764 |
| <i>DNMT3B</i>          | 20q11.21 | protein_coding | 0.03 | 0.82 (0.76-0.89)  | $7.85 \times 10^{-7}$   | $7.89 \times 10^{-5}$   | rs11480453 | JTI                | 31101764 |
| <i>GMEB2</i>           | 20q13.33 | protein_coding | 0.07 | 0.86 (0.81-0.91)  | $1.37 \times 10^{-7}$   | $1.71 \times 10^{-5}$   | rs6062509  | Modified<br>UTMOST | 30287866 |
|                        |          |                | 0.07 | 0.89 (0.84-0.94)  | $5.89 \times 10^{-5}$   | $3.31 \times 10^{-3}$   |            | JTI                |          |
| <b><i>LIME1</i></b>    | 20q13.33 | protein_coding | 0.15 | 0.85 (0.82-0.89)  | $2.37 \times 10^{-13}$  | $7.27 \times 10^{-11}$  | rs1058319  | PrediXcan          | 30287866 |



|                    |          |                |      |                  |                        |                        |           |                    |          |
|--------------------|----------|----------------|------|------------------|------------------------|------------------------|-----------|--------------------|----------|
|                    |          |                | 0.22 | 0.81 (0.78-0.85) | $2.31 \times 10^{-17}$ | $1.12 \times 10^{-14}$ |           | Modified<br>UTMOST |          |
|                    |          |                | 0.24 | 0.87 (0.83-0.9)  | $1.10 \times 10^{-11}$ | $2.67 \times 10^{-9}$  |           | JTI                |          |
| <i>TMPRSS2</i>     | 21q22.3  | protein_coding | 0.15 | 1.24 (1.17-1.32) | $1.44 \times 10^{-11}$ | $3.42 \times 10^{-9}$  | rs1041449 | PrediXcan          | 31308362 |
|                    |          |                | 0.18 | 5.6 (3.41-9.21)  | $1.44 \times 10^{-11}$ | $3.42 \times 10^{-9}$  |           | JTI                |          |
| <b><i>TBX1</i></b> | 22q11.21 | protein_coding | 0.26 | 0.91 (0.88-0.93) | $1.57 \times 10^{-10}$ | $3.22 \times 10^{-8}$  | rs2238776 | PrediXcan          | 31101764 |
|                    |          |                | 0.16 | 0.05 (0.02-0.12) | $7.26 \times 10^{-12}$ | $1.81 \times 10^{-9}$  |           | Modified<br>UTMOST |          |
|                    |          |                | 0.27 | 0.87 (0.83-0.91) | $1.35 \times 10^{-9}$  | $2.37 \times 10^{-7}$  |           | JTI                |          |
| <i>MCAT</i>        | 22q13.2  | protein_coding | 0.04 | 0.34 (0.28-0.43) | $4.44 \times 10^{-22}$ | $3.36 \times 10^{-19}$ | rs5751435 | JTI                | 30287866 |
| <i>TSPO</i>        | 22q13.2  | protein_coding | 0.02 | 0.8 (0.75-0.85)  | $5.75 \times 10^{-12}$ | $1.47 \times 10^{-9}$  | rs5751435 | Modified<br>UTMOST | 30287866 |
|                    |          |                | 0.03 | 0.6 (0.51-0.71)  | $1.34 \times 10^{-9}$  | $2.37 \times 10^{-7}$  |           | JTI                |          |
| <i>TTLL1</i>       | 22q13.2  | protein_coding | 0.05 | 0.81 (0.76-0.86) | $4.55 \times 10^{-13}$ | $1.34 \times 10^{-10}$ | rs5759167 | Modified<br>UTMOST | 31101764 |
|                    |          |                | 0.07 | 0.87 (0.82-0.92) | $7.39 \times 10^{-7}$  | $7.53 \times 10^{-5}$  |           | JTI                |          |

Bold genes represent those supported by all three genetic prediction models (PrediXcan, modified UTMOST and JTI).

<sup>a</sup> R<sup>2</sup>: prediction performance (R<sup>2</sup>) derived using GTEx data. P value: derived from association analyses of 79,194 cases and 61,112 controls; associations with

FDR-corrected  $P$  value  $\leq 0.05$  considered significant;

<sup>b</sup> Risk SNPs identified in previous GWAS or fine-mapping studies. The risk SNP closest to the gene is presented.

lncRNA: long noncoding RNAs.

**Supplementary Table 5** Twenty-four genes that have been previous reported as candidate susceptibility genes with the results of both-side direction in TWAS

| The present study |        |                |                 |                  |                        |                                |                                |                 | Three published TWAS studies |                                                          |          | Comparison of results |
|-------------------|--------|----------------|-----------------|------------------|------------------------|--------------------------------|--------------------------------|-----------------|------------------------------|----------------------------------------------------------|----------|-----------------------|
| Gene              | Region | Classification | R <sup>2a</sup> | OR (95% CI)      | P-value                | P-value after FDR <sup>a</sup> | Closest risk SNPs <sup>b</sup> | Model           | Direction                    | Training tissue                                          | PMID     |                       |
| <i>Clorf43</i>    | 1q21.3 | protein_coding | 0.02            | 1.24 (1.08-1.41) | 1.99×10 <sup>-3</sup>  | 4.89×10 <sup>-2</sup>          | rs34579442                     | JTI             | -                            | Cross-Tissue                                             | 31101764 | Inconsistent          |
|                   |        |                |                 |                  |                        |                                |                                |                 | +                            | NTR.BLOOD.RNAARR, TCGA.PRAD_SP.TUMOR                     | 30287866 | Consistent            |
| <i>PM20D1</i>     | 1q32.1 | protein_coding | 0.18            | 1.08 (1.05-1.12) | 2.64×10 <sup>-6</sup>  | 2.36×10 <sup>-4</sup>          | rs1775148                      | S-PrediXcan     | -                            | CMC.BRAIN.RNASEQ,ME TSIM.ADIPOSE.RNASEQ, TCGA.PRAD.TUMOR | 30287866 | Inconsistent          |
|                   |        |                |                 |                  |                        |                                |                                |                 | +                            | Cross-Tissue                                             | 31101764 | Consistent            |
|                   |        |                |                 |                  |                        |                                |                                |                 |                              |                                                          |          |                       |
| JTI               |        |                |                 |                  |                        |                                |                                |                 |                              |                                                          |          |                       |
| <i>TMEM150A</i>   | 2p11.2 | protein_coding | 0.02            | 1.76 (1.54-2.03) | 1.20×10 <sup>-15</sup> | 4.69×10 <sup>-13</sup>         | rs3731827                      | Modified UTMOST | -                            | CMC.BRAIN.RNASEQ,ME TSIM.ADIPOSE.RNASEQ,                 | 30287866 | Inconsistent          |

|              |        |                    |      |                         |                        |                        |           |                    |   |                                                                              |          |              |
|--------------|--------|--------------------|------|-------------------------|------------------------|------------------------|-----------|--------------------|---|------------------------------------------------------------------------------|----------|--------------|
|              |        |                    |      |                         |                        |                        |           |                    |   | TCGA.PRAD.<br>TUMOR                                                          |          |              |
|              |        |                    | 0.02 | 2.45<br>(1.88-<br>3.2)  | $4.54 \times 10^{-11}$ | $1.03 \times 10^{-8}$  |           | JTI                | + | Cross-Tissue                                                                 | 31101764 | Consistent   |
| <i>USP39</i> | 2p11.2 | protein_<br>coding | 0.03 | 1.5<br>(1.37-<br>1.65)  | $2.97 \times 10^{-17}$ | $1.41 \times 10^{-14}$ | rs3731827 | Modified<br>UTMOST | - | GTEEx.Muscle_<br>Skeletal,<br>TCGA.PRAD.<br>TUMOR,<br>TCGA.PRAD_<br>SP.TUMOR | 30287866 | Inconsistent |
|              |        |                    | 0.04 | 1.39<br>(1.27-<br>1.52) | $5.54 \times 10^{-13}$ | $1.58 \times 10^{-10}$ |           | JTI                | + | Prostate,<br>Cross-Tissue                                                    | 31101764 | Consistent   |
| <i>VAMP5</i> | 2p11.2 | protein_<br>coding | 0.05 | 1.25<br>(1.13-<br>1.38) | $9.36 \times 10^{-6}$  | $6.87 \times 10^{-4}$  | rs3731827 | Modified<br>UTMOST | - | GTEEx.Muscle_<br>Skeletal,<br>METSIM.ADI<br>POSE.RNASE<br>Q                  | 30287866 | Inconsistent |
|              |        |                    | 0.07 | 1.12<br>(1.05-<br>1.19) | $4.86 \times 10^{-4}$  | $1.73 \times 10^{-2}$  |           | JTI                | + | Cross-Tissue                                                                 | 31101764 | Consistent   |
| <i>LDAH</i>  | 2p24.1 | protein_<br>coding | 0.05 | 0.8<br>(0.75-<br>0.85)  | $3.45 \times 10^{-12}$ | $9.09 \times 10^{-10}$ | rs9306895 | 144.729            | - | Prostate                                                                     | 31101764 | Consistent   |
|              |        |                    | 0.13 | 0.87                    | $4.71 \times 10^{-15}$ | $1.78 \times 10^{-12}$ |           |                    | + | NTR.BLOOD.                                                                   | 30287866 | Inconsistent |

|               |        |                |      |                     |                        |                        |            |                 |   |                                                          |          |              |
|---------------|--------|----------------|------|---------------------|------------------------|------------------------|------------|-----------------|---|----------------------------------------------------------|----------|--------------|
|               |        |                |      | (0.83-0.9)          |                        |                        |            |                 |   | RNAARR, TCGA.PRAD_SP.TUMOR                               |          |              |
|               |        |                | 0.13 | 0.9<br>(0.88-0.93)  | $1.25 \times 10^{-12}$ | $3.48 \times 10^{-10}$ |            |                 |   |                                                          |          |              |
| <i>MLPH</i>   | 2q37.3 | protein_coding | 0.1  | 0.87<br>(0.83-0.91) | $2.74 \times 10^{-8}$  | $4.07 \times 10^{-6}$  | rs7584330  | S-PrediXcan     | - | Prostate                                                 | 31101764 | Consistent   |
|               |        |                | 0.13 | 0.23<br>(0.15-0.35) | $3.59 \times 10^{-11}$ | $8.21 \times 10^{-9}$  |            | Modified UTMOST | + | GTEX.Prostate, TCGA.PRAD.TUMOR, TCGA.PRAD_SP.TUMOR       | 30287866 | Inconsistent |
|               |        |                | 0.14 | 0.81<br>(0.76-0.85) | $7.11 \times 10^{-13}$ | $2.00 \times 10^{-10}$ |            | JTI             |   |                                                          |          |              |
| <i>CFAP44</i> | 3q13.2 | protein_coding | 0.06 | 1.21<br>(1.15-1.27) | $2.38 \times 10^{-12}$ | $6.34 \times 10^{-10}$ | rs1283104  | PrediXcan       | + | Cross-Tissue                                             | 31101764 | Consistent   |
|               |        |                | 0.09 | 1.15<br>(1.11-1.19) | $2.93 \times 10^{-14}$ | $1.04 \times 10^{-11}$ |            | Modified UTMOST | - | GTEX.Stomach, Whole_Blood, NTR.BLOOD. RNAARR, YFS.BLOOD. | 30287866 | Inconsistent |
|               |        |                | 0.16 | 1.13<br>(1.09-1.17) | $4.68 \times 10^{-13}$ | $1.37 \times 10^{-10}$ |            | JTI             |   |                                                          |          |              |
| <i>GPR160</i> | 3q26.2 | protein_coding | 0.02 | 0.67<br>(0.58-0.78) | $5.41 \times 10^{-8}$  | $7.54 \times 10^{-6}$  | rs71277158 | JTI             | - | Cross-Tissue                                             | 31101764 | Consistent   |
|               |        |                |      |                     |                        |                        |            |                 | + | GTEX.Stomach, Whole_Blood,                               | 30287866 | Inconsistent |

|             |         |                    |      |                         |                        |                        |                |                    |   |                                                                                                                                                                                                                                                         |          |              |
|-------------|---------|--------------------|------|-------------------------|------------------------|------------------------|----------------|--------------------|---|---------------------------------------------------------------------------------------------------------------------------------------------------------------------------------------------------------------------------------------------------------|----------|--------------|
|             |         |                    |      |                         |                        |                        |                |                    |   | NTR.BLOOD.<br>RNAARR,<br>YFS.BLOOD.                                                                                                                                                                                                                     |          |              |
| <i>PPA2</i> | 4q24    | protein_<br>coding | 0.11 | 1.06<br>(1.03-<br>1.1)  | $7.45 \times 10^{-4}$  | $2.39 \times 10^{-2}$  | rs3448028<br>4 | Modified<br>UTMOST | - | CMC.BRAIN.<br>RNASEQ,<br>TCGA.PRAD_<br>SP.TUMOR,<br>GTEEx.Brain_C<br>ortex,<br>Esophagus_Ga<br>stroesophageal<br>_Junction,<br>Heart_Atrial_<br>Appendage,<br>Lung,<br>Muscle_Skelet<br>al, Testis,<br>CMC.BRAIN.<br>RNASEQ,<br>TCGA.PRAD_<br>SP.TUMOR, | 30287866 | Inconsistent |
|             |         |                    | 0.15 | 1.09<br>(1.05-<br>1.13) | $9.60 \times 10^{-6}$  | $7.03 \times 10^{-4}$  |                | JTI                | + | prostate tissue                                                                                                                                                                                                                                         | 31308362 | Consistent   |
| <i>IRX4</i> | 5p15.33 | protein_<br>coding | 0.36 | 0.87<br>(0.85-          | $4.10 \times 10^{-25}$ | $4.32 \times 10^{-22}$ | rs4975758      | S-PrediXc<br>an    | + | TCGA.PRAD.<br>TUMOR,                                                                                                                                                                                                                                    | 30287866 | Inconsistent |

|              |         |                    |      |                         |                        |                        |           |                    |   |                                                                                                                                                                            |          |              |     |
|--------------|---------|--------------------|------|-------------------------|------------------------|------------------------|-----------|--------------------|---|----------------------------------------------------------------------------------------------------------------------------------------------------------------------------|----------|--------------|-----|
|              |         |                    |      | 0.89)                   |                        |                        |           |                    |   | TCGA.PRAD_                                                                                                                                                                 |          |              |     |
|              |         |                    | 0.38 | 0.75<br>(0.71-<br>0.79) | $3.90 \times 10^{-26}$ | $5.56 \times 10^{-23}$ |           | Modified<br>UTMOST | - | Prostate                                                                                                                                                                   | 31101764 | Consistent   |     |
|              |         |                    | 0.37 | 0.89<br>(0.87-<br>0.91) | $1.83 \times 10^{-26}$ | $2.96 \times 10^{-23}$ |           | JTI                |   |                                                                                                                                                                            |          |              |     |
| <i>FOXP4</i> | 6p21.1  | protein_<br>coding | 0.02 | 0.25<br>(0.18-<br>0.35) | $3.29 \times 10^{-16}$ | $1.37 \times 10^{-13}$ | rs1983891 | Modified<br>UTMOST | + | GTEX.Esophag<br>us_Mucosa                                                                                                                                                  | 30287866 | Inconsistent |     |
|              |         |                    |      |                         |                        |                        |           |                    | - | Prostate                                                                                                                                                                   | 31101764 | Consistent   |     |
|              |         |                    |      |                         |                        |                        |           |                    | - | prostate tissue                                                                                                                                                            | 31308362 |              |     |
| <i>SNRPC</i> | 6p21.31 | protein_<br>coding | 0.03 | 0.84<br>(0.77-<br>0.92) | $1.46 \times 10^{-4}$  | $6.85 \times 10^{-3}$  | rs9469899 | S-PrediXc<br>an    | - | Cross-Tissue                                                                                                                                                               | 31101764 | Consistent   |     |
|              |         |                    |      |                         |                        |                        |           |                    | + | GTEX.Adipose<br>_Subcutaneous<br>, Artery_Tibial,<br>Brain_Caudate<br>_basal_ganglia<br>,Esophagus_M<br>ucosa,Esophag<br>us_Muscularis,<br>Muscle_Skelet<br>al,Nerve_Tibia | 30287866 | Inconsistent |     |
|              |         |                    |      |                         |                        |                        |           |                    |   |                                                                                                                                                                            |          |              | JTI |

|              |        |                    |      |                         |                        |                        |           |                    |   |                                                                                                                                                                                  |          |              |
|--------------|--------|--------------------|------|-------------------------|------------------------|------------------------|-----------|--------------------|---|----------------------------------------------------------------------------------------------------------------------------------------------------------------------------------|----------|--------------|
|              |        |                    |      | 0.93)                   |                        |                        |           |                    |   | l,Skin_Sun_Ex<br>posed_Lower_<br>leg, Thyroid,<br>METSIM.ADI<br>POSE.RNASE<br>Q,YFS.BLOO<br>D.RNAARR                                                                             |          |              |
| <i>RGS17</i> | 6q25.2 | protein_<br>coding | 0.12 | 1.23<br>(1.18-<br>1.28) | $1.21 \times 10^{-21}$ | $8.38 \times 10^{-19}$ | rs3968480 | S-PrediXc<br>an    | - | CMC.BRAIN.<br>RNASEQ,<br>GTEX.Adipose<br>_Subcutaneous<br>,Cells_Transfo<br>rmed_fibroblas<br>ts,Esophagus_<br>Mucosa,Thyroi<br>d,TCGA.PRA<br>D.TUMOR,<br>TCGA.PRAD_<br>SP.TUMOR | 30287866 | Inconsistent |
|              |        |                    | 0.16 | 1.18<br>(1.14-<br>1.23) | $3.64 \times 10^{-21}$ | $2.32 \times 10^{-18}$ |           | Modified<br>UTMOST | + | Prostate,<br>Cross-Tissue                                                                                                                                                        | 31101764 | Consistent   |
|              |        |                    | 0.16 | 2.88<br>(2.3-3<br>.61)  | $9.76 \times 10^{-20}$ | $5.26 \times 10^{-17}$ |           | JTI                |   |                                                                                                                                                                                  |          |              |
| AC0937       | 7q21.3 | lncRNA             | 0.16 | 0.92                    | $2.46 \times 10^{-7}$  | $2.91 \times 10^{-5}$  | rs6465657 | PrediXcan          | - | Cross-Tissue                                                                                                                                                                     | 31101764 | Consistent   |



|       |        |                    |      |                     |                        |                        |           |                    |   |                                                                                                                                                                                                                                                                                     |          |              |
|-------|--------|--------------------|------|---------------------|------------------------|------------------------|-----------|--------------------|---|-------------------------------------------------------------------------------------------------------------------------------------------------------------------------------------------------------------------------------------------------------------------------------------|----------|--------------|
| 99.1  |        |                    |      | (0.9-0.95)          |                        |                        |           |                    |   |                                                                                                                                                                                                                                                                                     |          |              |
|       |        |                    | 0.15 | 0.88<br>(0.85-0.91) | $3.85 \times 10^{-14}$ | $1.31 \times 10^{-11}$ |           | Modified<br>UTMOST |   | GTEEx.Adipose<br>_Subcutaneous<br>, Artery_Tibial,<br>Brain_Caudate<br>_basal_ganglia<br>,Esophagus_M<br>ucosa,Esophag<br>us_Muscularis,<br>Muscle_Skelet<br>al,Nerve_Tibia<br>l,Skin_Sun_Ex<br>posed_Lower_<br>leg, Thyroid,<br>METSIM.ADI<br>POSE.RNASE<br>Q,YFS.BLOO<br>D.RNAARR | 30287866 | Inconsistent |
|       |        |                    | 0.22 | 0.92<br>(0.9-0.94)  | $3.77 \times 10^{-14}$ | $1.31 \times 10^{-11}$ | JTI       | +                  |   |                                                                                                                                                                                                                                                                                     |          |              |
| HAUS6 | 9p22.1 | protein_<br>coding | 0.04 | 0.68<br>(0.61-0.76) | $7.95 \times 10^{-12}$ | $1.95 \times 10^{-9}$  | rs1048169 | Modified<br>UTMOST | - | Cross-Tissue                                                                                                                                                                                                                                                                        | 31101764 | Consistent   |
|       |        |                    | 0.06 | 0.82                | $6.92 \times 10^{-9}$  | $1.14 \times 10^{-6}$  |           | JTI                | + | GTEEx.Adipose                                                                                                                                                                                                                                                                       | 30287866 | Inconsistent |

|                |         |                |      |                     |                       |                       |        |                 |   |                                                                                 |                                                                                                                                                                                                  |              |  |
|----------------|---------|----------------|------|---------------------|-----------------------|-----------------------|--------|-----------------|---|---------------------------------------------------------------------------------|--------------------------------------------------------------------------------------------------------------------------------------------------------------------------------------------------|--------------|--|
|                |         |                |      | (0.77-0.88)         |                       |                       |        |                 |   |                                                                                 | _Subcutaneous, Adipose_Visceral_Omentum, Artery_Aorta, Artery_Tibial, Breast_Mammary_Tissue, Cells_Transformed_fibroblasts, Esophagus_Muscularis, Nerve_Tibial, Ovary, Thyroid, TCGA.PRAD. TUMOR |              |  |
| <i>C9orf78</i> | 9q34.11 | protein_coding | 0.04 | 0.87<br>(0.81-0.94) | $1.74 \times 10^{-4}$ | $7.75 \times 10^{-3}$ | rs1182 | S-PrediXcan     | - | Cross-Tissue                                                                    | 31101764                                                                                                                                                                                         | Consistent   |  |
|                |         |                | 0.1  | 0.86<br>(0.81-0.91) | $4.78 \times 10^{-8}$ | $6.82 \times 10^{-6}$ |        | Modified UTMOST | + | GTEX.Adipose_Subcutaneous, Lung, Nerve_Tibial, Skin_Not_Sun_Exposed_Suprapubic, | 30287866                                                                                                                                                                                         | Inconsistent |  |
|                |         |                | 0.14 | 0.89<br>(0.85-0.94) | $2.82 \times 10^{-5}$ | $1.77 \times 10^{-3}$ |        | JTI             |   |                                                                                 |                                                                                                                                                                                                  |              |  |

|                           |              |                    |      |                         |                        |                        |           |                    |   |                                                                                                                                                                                                                      |          |              |
|---------------------------|--------------|--------------------|------|-------------------------|------------------------|------------------------|-----------|--------------------|---|----------------------------------------------------------------------------------------------------------------------------------------------------------------------------------------------------------------------|----------|--------------|
|                           |              |                    |      |                         |                        |                        |           |                    |   | Skin_Sun_Exp<br>osed_Lower_le<br>g, Stomach,<br>Testis,Thyroid,<br>Whole_Blood,<br>METSIM.ADI<br>POSE.RNASE<br>Q,TCGA.PRA<br>D.TUMOR                                                                                 |          |              |
| <i>MFSD13</i><br><i>A</i> | 10q24.3<br>2 | protein_<br>coding | 0.38 | 1.08<br>(1.05-<br>1.1)  | $1.91 \times 10^{-12}$ | $5.14 \times 10^{-10}$ | rs3850699 | PrediXcan          | + | Prostate,<br>Cross-Tissue                                                                                                                                                                                            | 31101764 | Consistent   |
|                           |              |                    | 0.39 | 1.09<br>(1.06-<br>1.11) | $1.32 \times 10^{-12}$ | $3.64 \times 10^{-10}$ |           | Modified<br>UTMOST | - | GTEx.Adipose<br>_Subcutaneous<br>, Lung,<br>Nerve_Tibial,<br>Skin_Not_Sun<br>_Exposed_Sup<br>rapubic,<br>Skin_Sun_Exp<br>osed_Lower_le<br>g, Stomach,<br>Testis,Thyroid,<br>Whole_Blood,<br>METSIM.ADI<br>POSE.RNASE | 30287866 | Inconsistent |
|                           |              |                    | 0.39 | 1.08<br>(1.05-<br>1.1)  | $1.79 \times 10^{-12}$ | $4.87 \times 10^{-10}$ |           | JTI                |   |                                                                                                                                                                                                                      |          |              |

|               |         |                    |      |                         |                        |                        |           |                    |   |                                                                                                                                                                                                                                                |          |              |
|---------------|---------|--------------------|------|-------------------------|------------------------|------------------------|-----------|--------------------|---|------------------------------------------------------------------------------------------------------------------------------------------------------------------------------------------------------------------------------------------------|----------|--------------|
|               |         |                    |      |                         |                        |                        |           |                    |   | Q,TCGA.PRA<br>D.TUMOR                                                                                                                                                                                                                          |          |              |
| <i>TLCD3A</i> | 17p13.3 | protein_<br>coding | 0.05 | 0.77<br>(0.72-<br>0.82) | $3.78 \times 10^{-14}$ | $1.31 \times 10^{-11}$ | rs461251  | PrediXcan          | - | prostate tissue                                                                                                                                                                                                                                | 31308362 | Consistent   |
|               |         |                    | 0.11 | 0.86<br>(0.82-<br>0.9)  | $5.26 \times 10^{-12}$ | $1.36 \times 10^{-9}$  |           | JTI                | + | GTEEx.Adipose<br>_Subcutaneous<br>, Lung,<br>Nerve_Tibial,<br>Skin_Not_Sun<br>_Exposed_Sup<br>rapubic,<br>Skin_Sun_Exp<br>osed_Lower_le<br>g, Stomach,<br>Testis,Thyroid,<br>Whole_Blood,<br>METSIM.ADI<br>POSE.RNASE<br>Q,TCGA.PRA<br>D.TUMOR | 30287866 | Inconsistent |
| <i>POLI</i>   | 18q21.2 | protein_<br>coding | 0.25 | 0.93<br>(0.9-0<br>.95)  | $6.61 \times 10^{-7}$  | $6.85 \times 10^{-5}$  | rs8093601 | S-PrediXc<br>an    | - | Prostate,<br>Cross-Tissue                                                                                                                                                                                                                      | 31101764 | Consistent   |
|               |         |                    | 0.27 | 0.92<br>(0.9-0          | $5.55 \times 10^{-8}$  | $7.67 \times 10^{-6}$  |           | Modified<br>UTMOST | + | NTR.BLOOD.<br>RNAARR,                                                                                                                                                                                                                          | 30287866 | Inconsistent |



|               |              |                    |      |                         |                        |                       |                |                    |   |                                                                                                           |          |              |
|---------------|--------------|--------------------|------|-------------------------|------------------------|-----------------------|----------------|--------------------|---|-----------------------------------------------------------------------------------------------------------|----------|--------------|
|               |              |                    |      |                         |                        |                       |                |                    |   | Thyroid,<br>Whole_Blood,<br>METSIM.ADI<br>POSE.RNASE<br>Q,YFS.BLOO<br>D.RNAARR,<br>TCGA.PRAD_<br>SP.TUMOR |          |              |
| <i>MYO9B</i>  | 19p13.1<br>1 | protein_<br>coding | 0.05 | 1.29<br>(1.19-<br>1.41) | $4.08 \times 10^{-9}$  | $6.82 \times 10^{-7}$ | rs1166656<br>9 | S-PrediXc<br>an    | - | Prostate,<br>Cross-Tissue                                                                                 | 31101764 | Inconsistent |
|               |              |                    | 0.09 | 1.23<br>(1.14-<br>1.32) | $2.84 \times 10^{-8}$  | $4.20 \times 10^{-6}$ |                | Modified<br>UTMOST |   |                                                                                                           |          |              |
|               |              |                    | 0.09 | 1.83<br>(1.46-<br>2.29) | $1.30 \times 10^{-7}$  | $1.63 \times 10^{-5}$ |                | JTI                | + | NTR.BLOOD.<br>RNAARR                                                                                      | 30287866 | Consistent   |
| <i>PM20D1</i> | 1q32.1       | protein_<br>coding | 0.18 | 1.08<br>(1.05-<br>1.12) | $2.64 \times 10^{-6}$  | $2.36 \times 10^{-4}$ | rs1775148      | S-PrediXc<br>an    | - | CMC.BRAIN.<br>RNASEQ,ME<br>TSIM.ADIPO<br>SE.RNASEQ,<br>TCGA.PRAD.<br>TUMOR                                | 30287866 | Inconsistent |
|               |              |                    | 0.23 | 1.09<br>(1.06-<br>1.13) | $5.97 \times 10^{-10}$ | $1.10 \times 10^{-7}$ |                | Modified<br>UTMOST |   |                                                                                                           |          |              |
|               |              |                    | 0.25 | 1.06<br>(1.04-<br>1.08) | $2.19 \times 10^{-8}$  | $3.34 \times 10^{-6}$ |                | JTI                | + | Cross-Tissue                                                                                              | 31101764 | Consistent   |

|                 |        |                |      |                     |                        |                        |           |                    |   |                                                                             |          |              |
|-----------------|--------|----------------|------|---------------------|------------------------|------------------------|-----------|--------------------|---|-----------------------------------------------------------------------------|----------|--------------|
| <i>TMEM150A</i> | 2p11.2 | protein_coding | 0.02 | 1.76<br>(1.54-2.03) | $1.20 \times 10^{-15}$ | $4.69 \times 10^{-13}$ | rs3731827 | Modified<br>UTMOST | - | CMC.BRAIN.<br>RNASEQ,ME<br>TSIM.ADIPO<br>SE.RNASEQ,<br>TCGA.PRAD.<br>TUMOR  | 30287866 | Inconsistent |
|                 |        |                | 0.02 | 2.45<br>(1.88-3.2)  | $4.54 \times 10^{-11}$ | $1.03 \times 10^{-8}$  |           | JTI                | + | Cross-Tissue                                                                | 31101764 | Consistent   |
| <i>USP39</i>    | 2p11.2 | protein_coding | 0.03 | 1.5<br>(1.37-1.65)  | $2.97 \times 10^{-17}$ | $1.41 \times 10^{-14}$ | rs3731827 | Modified<br>UTMOST | - | GTEX.Muscle_<br>Skeletal,<br>TCGA.PRAD.<br>TUMOR,<br>TCGA.PRAD_<br>SP.TUMOR | 30287866 | Inconsistent |
|                 |        |                | 0.04 | 1.39<br>(1.27-1.52) | $5.54 \times 10^{-13}$ | $1.58 \times 10^{-10}$ |           | JTI                |   |                                                                             |          |              |
| <i>VAMP5</i>    | 2p11.2 | protein_coding | 0.05 | 1.25<br>(1.13-1.38) | $9.36 \times 10^{-6}$  | $6.87 \times 10^{-4}$  | rs3731827 | Modified<br>UTMOST | - | GTEX.Muscle_<br>Skeletal,<br>METSIM.ADI<br>POSE.RNASE<br>Q                  | 30287866 | Inconsistent |
|                 |        |                | 0.07 | 1.12<br>(1.05-1.19) | $4.86 \times 10^{-4}$  | $1.73 \times 10^{-2}$  |           | JTI                |   |                                                                             |          |              |

|             |         |                |      |                     |                        |                        |                |                    |   |                                                                                                                                                                                                                                                        |          |              |
|-------------|---------|----------------|------|---------------------|------------------------|------------------------|----------------|--------------------|---|--------------------------------------------------------------------------------------------------------------------------------------------------------------------------------------------------------------------------------------------------------|----------|--------------|
| <i>PPA2</i> | 4q24    | protein_coding | 0.11 | 1.06<br>(1.03-1.1)  | $7.45 \times 10^{-4}$  | $2.39 \times 10^{-2}$  | rs3448028<br>4 | Modified<br>UTMOST | - | CMC.BRAIN.<br>RNASEQ,<br>TCGA.PRAD_<br>SP.TUMOR,<br>GTEx.Brain_C<br>ortex,<br>Esophagus_Ga<br>stroesophageal<br>_Junction,<br>Heart_Atrial_<br>Appendage,<br>Lung,<br>Muscle_Skelet<br>al, Testis,<br>CMC.BRAIN.<br>RNASEQ,<br>TCGA.PRAD_<br>SP.TUMOR, | 30287866 | Inconsistent |
|             |         |                | 0.15 | 1.09<br>(1.05-1.13) | $9.60 \times 10^{-6}$  | $7.03 \times 10^{-4}$  |                | JTI                |   |                                                                                                                                                                                                                                                        |          |              |
|             |         |                |      |                     |                        |                        |                |                    |   |                                                                                                                                                                                                                                                        |          |              |
| <i>IRX4</i> | 5p15.33 | protein_coding | 0.36 | 0.87<br>(0.85-0.89) | $4.10 \times 10^{-25}$ | $4.32 \times 10^{-22}$ | rs4975758      | S-PrediXc<br>an    | + | TCGA.PRAD.<br>TUMOR,<br>TCGA.PRAD_<br>SP.TUMOR                                                                                                                                                                                                         | 30287866 | Inconsistent |
|             |         |                | 0.38 | 0.75<br>(0.71-0.79) | $3.90 \times 10^{-26}$ | $5.56 \times 10^{-23}$ |                | Modified<br>UTMOST |   |                                                                                                                                                                                                                                                        |          |              |
|             |         |                | 0.37 | 0.89                | $1.83 \times 10^{-26}$ | $2.96 \times 10^{-23}$ |                | JTI                |   |                                                                                                                                                                                                                                                        |          |              |



|               |         |                |      |                     |                        |                        |           |                    |   |                                                                                                                                            |          |              |                        |                        |                        |                    |
|---------------|---------|----------------|------|---------------------|------------------------|------------------------|-----------|--------------------|---|--------------------------------------------------------------------------------------------------------------------------------------------|----------|--------------|------------------------|------------------------|------------------------|--------------------|
|               |         |                |      | (0.87-0.91)         |                        |                        |           |                    |   | -                                                                                                                                          | Prostate | 31101764     | Consistent             |                        |                        |                    |
| <i>FOXP4</i>  | 6p21.1  | protein_coding | 0.02 | 0.25<br>(0.18-0.35) | $3.29 \times 10^{-16}$ | $1.37 \times 10^{-13}$ | rs1983891 | Modified<br>UTMOST | + | GTEX.Esophagus_Mucosa                                                                                                                      | 30287866 | Inconsistent |                        |                        |                        |                    |
|               |         |                |      |                     |                        |                        |           |                    | - | Prostate                                                                                                                                   | 31101764 | Consistent   |                        |                        |                        |                    |
|               |         |                |      |                     |                        |                        |           |                    | - | prostate tissue                                                                                                                            | 31308362 |              |                        |                        |                        |                    |
| <i>RGS17</i>  | 6q25.2  | protein_coding | 0.12 | 1.23<br>(1.18-1.28) | $1.21 \times 10^{-21}$ | $8.38 \times 10^{-19}$ | rs3968480 | S-PrediXcan        | - | CMC.BRAIN.RNASEQ, GTEX.Adipose_Subcutaneous, Cells_Transformed_fibroblasts, Esophagus_Mucosa, Thyroid, TCGA.PRAD.TUMOR, TCGA.PRAD_SP.TUMOR | 30287866 | Inconsistent |                        |                        |                        |                    |
|               |         |                |      |                     |                        |                        |           | 0.16               |   |                                                                                                                                            |          |              | 1.18<br>(1.14-1.23)    | $3.64 \times 10^{-21}$ | $2.32 \times 10^{-18}$ | Modified<br>UTMOST |
|               |         |                |      |                     |                        |                        |           | 0.16               |   |                                                                                                                                            |          |              | 2.88<br>(2.3-3.61)     | $9.76 \times 10^{-20}$ | $5.26 \times 10^{-17}$ | JTI                |
|               |         |                |      |                     |                        |                        |           | +                  |   |                                                                                                                                            |          |              | Prostate, Cross-Tissue | 31101764               | Consistent             |                    |
| <i>GEMIN4</i> | 17p13.3 | protein_coding | 0.06 | 0.82<br>(0.77-0.87) | $4.50 \times 10^{-10}$ | $8.39 \times 10^{-8}$  | rs461251  | JTI                | + | GTEX.Colon_Transverse, TCGA.PRAD.TUMOR                                                                                                     | 30287866 | Inconsistent |                        |                        |                        |                    |
|               |         |                |      |                     |                        |                        |           |                    | - | Prostate tissue                                                                                                                            | 31308362 | Consistent   |                        |                        |                        |                    |

|               |         |                |      |                     |                        |                       |          |                 |   |                                                                                           |          |              |
|---------------|---------|----------------|------|---------------------|------------------------|-----------------------|----------|-----------------|---|-------------------------------------------------------------------------------------------|----------|--------------|
| <i>VPS53</i>  | 17p13.3 | protein_coding | 0.42 | 0.96<br>(0.94-0.98) | $7.61 \times 10^{-5}$  | $4.10 \times 10^{-3}$ | rs684232 | S-PrediXcan     | + | CMC.BRAIN.RNASEQ,GTEX.Brain_Caudate_basal_ganglia,Brain_Cortex,Stomach,TCGA.PRAD_SP.TUMOR | 30287866 | Inconsistent |
|               |         |                | 0.47 | 0.96<br>(0.94-0.98) | $8.64 \times 10^{-5}$  | $4.50 \times 10^{-3}$ |          | Modified UTMOST | - | prostate tissue                                                                           | 31308362 | Consistent   |
|               |         |                | 0.51 | 0.96<br>(0.93-0.98) | $2.10 \times 10^{-4}$  | $8.97 \times 10^{-3}$ |          | JTI             |   |                                                                                           |          |              |
| <i>GEMIN4</i> | 17p13.3 | protein_coding | 0.06 | 0.82<br>(0.77-0.87) | $4.50 \times 10^{-10}$ | $8.39 \times 10^{-8}$ | rs461251 | JTI             | + | GTEX.Colon_Transverse,TCGA.PRAD.TUMOR                                                     | 30287866 | Inconsistent |
|               |         |                |      |                     |                        |                       |          |                 | - | Prostate tissue                                                                           | 31308362 | Consistent   |
| <i>VPS53</i>  | 17p13.3 | protein_coding | 0.42 | 0.96<br>(0.94-0.98) | $7.61 \times 10^{-5}$  | $4.10 \times 10^{-3}$ | rs684232 | S-PrediXcan     | + | CMC.BRAIN.RNASEQ,GTEX.Brain_Caudate_basal_ganglia,Brain_Cortex,Stomach,TCGA.PRAD_         | 30287866 | Inconsistent |

|              |              |                    |      |                         |                       |                       |                |                    |   |                        |          |              |
|--------------|--------------|--------------------|------|-------------------------|-----------------------|-----------------------|----------------|--------------------|---|------------------------|----------|--------------|
|              |              |                    |      |                         |                       |                       |                |                    |   | SP.TUMOR               |          |              |
|              |              |                    | 0.47 | 0.96<br>(0.94-<br>0.98) | $8.64 \times 10^{-5}$ | $4.50 \times 10^{-3}$ |                | Modified<br>UTMOST | - | prostate tissue        | 31308362 | Consistent   |
|              |              |                    | 0.51 | 0.96<br>(0.93-<br>0.98) | $2.10 \times 10^{-4}$ | $8.97 \times 10^{-3}$ |                | JTI                |   |                        |          |              |
| <i>UQCCI</i> | 20q11.2<br>2 | protein_<br>coding | 0.02 | 1.12<br>(1.07-<br>1.17) | $1.35 \times 10^{-6}$ | $1.28 \times 10^{-4}$ | rs1148045<br>3 | JTI                | - | TCGA.PRAD_<br>SP.TUMOR | 30287866 | Inconsistent |
|              |              |                    |      |                         |                       |                       |                |                    | + | Cross-Tissue           | 31101764 | Consistent   |

<sup>a</sup> R<sup>2</sup>: prediction performance (R<sup>2</sup>) derived using GTEx data. *P* value: derived from association analyses of 79,194 cases and 61,112 controls; associations with FDR-corrected *P* value  $\leq 0.05$  considered significant;

<sup>b</sup> Risk SNPs identified in previous GWAS or fine-mapping studies. The risk SNP closest to the gene is presented.

**Supplementary Table 6** Sixteen genes that have been previously reported as candidate susceptibility genes in TWAS with different directions compared with those in the current analyses

| The present study |        |                |                 |                  |                        |                                |                                |                 | Three published TWAS studies                                                                                                                                                                                                    |          |
|-------------------|--------|----------------|-----------------|------------------|------------------------|--------------------------------|--------------------------------|-----------------|---------------------------------------------------------------------------------------------------------------------------------------------------------------------------------------------------------------------------------|----------|
| Gene              | Region | Classification | R <sup>2a</sup> | OR (95% CI)      | P-value                | P-value after FDR <sup>a</sup> | Closest risk SNPs <sup>b</sup> | Model           | Training tissue                                                                                                                                                                                                                 | PMID     |
| <i>HAX1</i>       | 1q21.3 | protein_coding | 0.04            | 0.88 (0.82-0.94) | 3.71×10 <sup>-4</sup>  | 1.43×10 <sup>-2</sup>          | rs34579442                     | Modified UTMOST | GTEx.Heart_Left_Ventri cle                                                                                                                                                                                                      | 30287866 |
|                   |        |                | 0.05            | 0.93 (0.89-0.97) | 1.77×10 <sup>-3</sup>  | 4.48×10 <sup>-2</sup>          |                                | JTI             |                                                                                                                                                                                                                                 |          |
| <i>ZBTB7B</i>     | 1q21.3 | protein_coding | 0.02            | 1.42 (1.28-1.58) | 1.47×10 <sup>-10</sup> | 3.05×10 <sup>-8</sup>          | rs4845695                      | Modified UTMOST | CMC.BRAIN.RNASEQ, NTR.BLOOD.RNAARR                                                                                                                                                                                              | 30287866 |
|                   |        |                | 0.03            | 1.24 (1.15-1.33) | 4.01×10 <sup>-9</sup>  | 6.77×10 <sup>-7</sup>          |                                | JTI             |                                                                                                                                                                                                                                 |          |
| <i>NUCKS1</i>     | 1q32.1 | protein_coding | 0.05            | 1.13 (1.07-1.18) | 1.81×10 <sup>-6</sup>  | 1.67×10 <sup>-4</sup>          | rs4245739                      | S-PrediXcan     | GTEx.Esophagus_Muco sa, METSIM.ADIPOSE.RN ASEQ, GTEx.Thyroid, GTEx.Testis, YFS.BLOOD.RNAARR, GTEx.Brain_Caudate_ba sal_ganglia, GTEx.Brain_Cerebellum , GTEx.Stomach, GTEx.Heart_Atrial_App endage, GTEx.Heart_Left_Ventri cle, | 30287866 |
|                   |        |                | 0.08            | 1.23 (1.15-1.32) | 7.09×10 <sup>-10</sup> | 1.29×10 <sup>-7</sup>          |                                | Modified UTMOST |                                                                                                                                                                                                                                 |          |
|                   |        |                | 0.09            | 1.17 (1.11-1.22) | 1.79×10 <sup>-10</sup> | 3.56×10 <sup>-8</sup>          |                                | JTI             |                                                                                                                                                                                                                                 |          |

|               |        |                |      |                  |                        |                       |            |                    |                                                                                                                                                                                                                                                                                                                                                    |          |
|---------------|--------|----------------|------|------------------|------------------------|-----------------------|------------|--------------------|----------------------------------------------------------------------------------------------------------------------------------------------------------------------------------------------------------------------------------------------------------------------------------------------------------------------------------------------------|----------|
|               |        |                |      |                  |                        |                       |            |                    | GTEX.Skin_Sun_Exposed_Lower_leg,<br>GTEX.Adipose_Subcutaneous, GTEX.Prostate,<br>GTEX.Lung,<br>GTEX.Nerve_Tibial,<br>GTEX.Esophagus_Muscularis,<br>GTEX.Skin_Not_Sun_Exposed_Suprapubic,<br>GTEX.Artery_Aorta,<br>GTEX.Brain_Putamen_basal_ganglia,<br>GTEX.Artery_Tibial,<br>GTEX.Pituitary,<br>GTEX.Breast_Mammary_Tissue,<br>TCGA.PRAD_SP.TUMOR |          |
| <i>TMEM17</i> | 2p15   | protein_coding | 0.04 | 1.11 (1.06-1.17) | $1.05 \times 10^{-5}$  | $7.62 \times 10^{-4}$ | rs7591218  | Modified<br>UTMOST | GTEX.Esophagus_Mucosa,<br>METSIM.ADIPOSE.RNASEQ                                                                                                                                                                                                                                                                                                    | 30287866 |
|               |        |                | 0.07 | 1.11 (1.05-1.17) | $5.07 \times 10^{-4}$  | $1.79 \times 10^{-2}$ |            | JTI                |                                                                                                                                                                                                                                                                                                                                                    |          |
| <i>PDK1</i>   | 2q31.1 | protein_coding | 0.04 | 1.46 (1.3-1.64)  | $1.60 \times 10^{-10}$ | $3.23 \times 10^{-8}$ | rs12151618 | Modified<br>UTMOST | GTEX.Heart_Atrial_Appendage                                                                                                                                                                                                                                                                                                                        | 30287866 |
|               |        |                | 0.04 | 1.26 (1.15-1.37) | $3.80 \times 10^{-7}$  | $4.22 \times 10^{-5}$ |            | JTI                |                                                                                                                                                                                                                                                                                                                                                    |          |

|              |         |                |      |                  |                        |                       |                 |                 |                                                                                                                                                                                                                                                                                                  |          |
|--------------|---------|----------------|------|------------------|------------------------|-----------------------|-----------------|-----------------|--------------------------------------------------------------------------------------------------------------------------------------------------------------------------------------------------------------------------------------------------------------------------------------------------|----------|
| <i>CASP8</i> | 2q33.1  | protein_coding | 0.06 | 1.06 (1.03-1.1)  | $7.21 \times 10^{-5}$  | $3.93 \times 10^{-3}$ | rs34925593      | JTI             | Adipose_Subcutaneous, Adipose_Visceral_Omentum, Brain_Cerebellar_Hemisphere, Brain_Cerebellum, Brain_Frontal_Cortex_BA9, Breast_Mammary_Tissue, Cells_Transformed_fibroblasts, Colon_Transverse, Lung, Muscle_Skeletal, Pancreas, Stomach, Whole_Blood, METSIM. ADIPOSE.RNASEQ, NTR.BLOOD.RNAARR | 30287866 |
| <i>MBNL1</i> | 3q25.1  | protein_coding | 0.03 | 1.32 (1.21-1.43) | $6.13 \times 10^{-11}$ | $1.34 \times 10^{-8}$ | rs18231433<br>4 | S-PrediXcan     | CMC.BRAIN.RNASEQ, GTEx.Cells_EBV-transformed_lymphocytes, TCGA.PRAD.TUMOR                                                                                                                                                                                                                        | 30287866 |
|              |         |                | 0.04 | 1.26 (1.1-1.45)  | $7.83 \times 10^{-4}$  | $2.48 \times 10^{-2}$ |                 | JTI             |                                                                                                                                                                                                                                                                                                  |          |
| <i>IGF2R</i> | 6q25.3  | protein_coding | 0.03 | 1.22 (1.12-1.34) | $1.28 \times 10^{-5}$  | $8.97 \times 10^{-4}$ | rs651164        | Modified UTMOST | TCGA.PRAD.SP.TUMOR                                                                                                                                                                                                                                                                               | 30287866 |
| <i>TOR1A</i> | 9q34.11 | protein_coding | 0.07 | 0.88 (0.83-0.93) | $1.91 \times 10^{-5}$  | $1.27 \times 10^{-3}$ | rs1182          | Modified UTMOST | GTEx.Brain_Cerebellum, Colon_Transverse, Esophagus_Mucosa, Pancreas, Stomach, Thyroid, Whole_Blood, TCGA.PRAD.TUMOR                                                                                                                                                                              | 30287866 |

|                |              |                |      |                  |                        |                        |            |                    |                                                                                       |          |
|----------------|--------------|----------------|------|------------------|------------------------|------------------------|------------|--------------------|---------------------------------------------------------------------------------------|----------|
| <i>SUFU</i>    | 10q24.3<br>2 | protein_coding | 0.02 | 1.89 (1.57-2.26) | $6.29 \times 10^{-12}$ | $1.59 \times 10^{-9}$  | rs3850699  | Modified<br>UTMOST | GTEx.Esophagus_Mucosa,Esophagus_Muscularis,<br>Skin_Sun_Exposed_Lower_leg             | 30287866 |
|                |              |                | 0.03 | 1.66 (1.42-1.94) | $3.57 \times 10^{-10}$ | $6.71 \times 10^{-8}$  |            | JTI                |                                                                                       |          |
| <i>TUBA1C</i>  | 12q13.1<br>2 | protein_coding | 0.02 | 0.87 (0.8-0.94)  | $4.42 \times 10^{-4}$  | $1.61 \times 10^{-2}$  | rs10875943 | JTI                | GTEx.Skin_Sun_Exposed_Lower_leg,TCGA.PRAD.TUMOR,TCGA.PRAD_SP.TUMOR,TCGA.PRAD_SP.TUMOR | 30287866 |
| <i>SUPT4H1</i> | 17q22        | protein_coding | 0.05 | 1.19 (1.1-1.28)  | $8.12 \times 10^{-6}$  | $6.07 \times 10^{-4}$  | rs2680708  | Modified<br>UTMOST | GTEx.Brain_Putamen_basal_ganglia                                                      | 30287866 |
|                |              |                | 0.06 | 1.1 (1.06-1.15)  | $3.68 \times 10^{-6}$  | $3.19 \times 10^{-4}$  |            | JTI                |                                                                                       |          |
| <i>ARFRP1</i>  | 20q13.3<br>3 | protein_coding | 0.02 | 1.73 (1.53-1.96) | $2.75 \times 10^{-18}$ | $1.45 \times 10^{-15}$ | rs6062509  | Modified<br>UTMOST | CMC.BRAIN.RNASEQ,TCGA.PRAD.TUMOR,TCGA.PRAD_SP.TUMOR                                   | 30287866 |
| <i>RTEL1</i>   | 20q13.3<br>3 | protein_coding | 0.02 | 1.51 (1.36-1.67) | $3.50 \times 10^{-15}$ | $1.35 \times 10^{-12}$ | rs6062509  | Modified<br>UTMOST | GTEx.Testis,<br>METSIM.ADIPOSE.RNASEQ                                                 | 30287866 |
|                |              |                | 0.09 | 1.15 (1.11-1.18) | $3.40 \times 10^{-22}$ | $2.66 \times 10^{-19}$ |            | JTI                |                                                                                       |          |
| <i>ZGPAT</i>   | 20q13.3<br>3 | protein_coding | 0.04 | 1.5 (1.23-1.83)  | $8.76 \times 10^{-5}$  | $4.53 \times 10^{-3}$  | rs6062509  | JTI                | TCGA.PRAD.TUMOR                                                                       | 30287866 |
| <i>ARFGAP3</i> | 22q13.2      | protein_coding | 0.08 | 1.08 (1.03-1.13) | $1.27 \times 10^{-3}$  | $3.56 \times 10^{-2}$  | rs5759167  | S-PrediXcan        | GTEx.Artery_Tibial                                                                    | 30287866 |
|                |              |                | 0.09 | 1.08 (1.03-1.13) | $9.64 \times 10^{-4}$  | $2.91 \times 10^{-2}$  |            | Modified<br>UTMOST |                                                                                       |          |

|  |  |      |                  |                       |                       |     |  |
|--|--|------|------------------|-----------------------|-----------------------|-----|--|
|  |  | 0.11 | 1.08 (1.03-1.12) | $3.94 \times 10^{-4}$ | $1.49 \times 10^{-2}$ | JTI |  |
|--|--|------|------------------|-----------------------|-----------------------|-----|--|

<sup>a</sup>  $R^2$ : prediction performance ( $R^2$ ) derived using GTEx data.  $P$  value: derived from association analyses of 79,194 cases and 61,112 controls; associations with FDR-corrected  $P$  value  $\leq 0.05$  considered significant;

<sup>b</sup> Risk SNPs identified in previous GWAS or fine-mapping studies. The risk SNP closest to the gene is presented.



**Supplementary Table 7** One hundred and fifty-two genes showing differential expression in tumor vs normal prostate samples with directions of effect consistent with those in TWAS analyses

| Gene name       | Region  | Classification | FC    | <i>P</i> -value after FDR <sup>a</sup> |
|-----------------|---------|----------------|-------|----------------------------------------|
| <i>SV2A</i>     | 1q21.2  | protein_coding | -1.95 | $1.06 \times 10^{-11}$                 |
| <i>ZBTB7B</i>   | 1q21.3  | protein_coding | 1.51  | $2.72 \times 10^{-12}$                 |
| <i>C1orf43</i>  | 1q21.3  | protein_coding | 1.20  | $1.76 \times 10^{-8}$                  |
| <i>PRUNE1</i>   | 1q21.3  | protein_coding | -1.14 | $8.37 \times 10^{-7}$                  |
| <i>ARNT</i>     | 1q21.3  | protein_coding | -1.17 | $1.25 \times 10^{-5}$                  |
| <i>DENND4B</i>  | 1q21.3  | protein_coding | 1.22  | $4.74 \times 10^{-5}$                  |
| <i>KCNN3</i>    | 1q21.3  | protein_coding | -1.52 | $2.63 \times 10^{-4}$                  |
| <i>CTSS</i>     | 1q21.3  | protein_coding | -1.24 | $7.49 \times 10^{-3}$                  |
| <i>ADAM15</i>   | 1q22    | protein_coding | 1.36  | $4.51 \times 10^{-8}$                  |
| <i>HDGF</i>     | 1q23.1  | protein_coding | 1.25  | $2.40 \times 10^{-10}$                 |
| <i>NTRK1</i>    | 1q23.1  | protein_coding | -2.63 | $3.79 \times 10^{-4}$                  |
| <i>SLC41A1</i>  | 1q32.1  | protein_coding | -1.02 | $6.08 \times 10^{-3}$                  |
| <i>PPP1R15B</i> | 1q32.1  | protein_coding | -1.11 | 0.01                                   |
| <i>YBX1</i>     | 1p34.2  | protein_coding | 1.05  | 0.04                                   |
| <i>RPA2</i>     | 1p35.3  | protein_coding | -1.10 | $1.31 \times 10^{-3}$                  |
| <i>PLA2G2A</i>  | 1p36.13 | protein_coding | 3.40  | $1.24 \times 10^{-4}$                  |
| <i>CORT</i>     | 1p36.22 | protein_coding | 1.63  | $3.13 \times 10^{-3}$                  |
| <i>TMEM150A</i> | 2p11.2  | protein_coding | 1.22  | $6.97 \times 10^{-6}$                  |
| <i>CEP68</i>    | 2p14    | protein_coding | -1.63 | $4.53 \times 10^{-14}$                 |
| <i>TMEM17</i>   | 2p15    | protein_coding | 1.16  | $9.96 \times 10^{-3}$                  |

|                |         |                |       |                        |
|----------------|---------|----------------|-------|------------------------|
| <i>LDAH</i>    | 2p24.1  | protein_coding | -1.73 | $2.84 \times 10^{-11}$ |
| <i>SLC20A1</i> | 2q13    | protein_coding | 1.12  | $1.35 \times 10^{-3}$  |
| <i>PDE11A</i>  | 2q31.2  | protein_coding | -1.42 | $3.04 \times 10^{-3}$  |
| <i>CASP8</i>   | 2q33.1  | protein_coding | 1.22  | $3.51 \times 10^{-4}$  |
| <i>CASP10</i>  | 2q33.1  | protein_coding | -1.27 | $2.10 \times 10^{-3}$  |
| <i>EFHD1</i>   | 2q37.1  | protein_coding | -2.45 | $7.14 \times 10^{-10}$ |
| <i>SEPTIN2</i> | 2q37.3  | protein_coding | -1.26 | $2.77 \times 10^{-11}$ |
| <i>HDLBP</i>   | 2q37.3  | protein_coding | 1.24  | $3.01 \times 10^{-10}$ |
| <i>PDE12</i>   | 3p14.3  | protein_coding | -1.09 | $4.77 \times 10^{-3}$  |
| <i>AMT</i>     | 3p21.31 | protein_coding | -1.87 | $3.42 \times 10^{-12}$ |
| <i>RNF123</i>  | 3p21.31 | protein_coding | 1.19  | $4.19 \times 10^{-10}$ |
| <i>UBA7</i>    | 3p21.31 | protein_coding | -1.26 | $6.88 \times 10^{-5}$  |
| <i>GMPPB</i>   | 3p21.31 | protein_coding | 1.19  | $9.62 \times 10^{-3}$  |
| <i>SRGAP3</i>  | 3p25.3  | protein_coding | -1.15 | 0.04                   |
| <i>THUMPD3</i> | 3p25.3  | protein_coding | 1.05  | 0.04                   |
| <i>CFAP44</i>  | 3q13.2  | protein_coding | 1.47  | $4.88 \times 10^{-5}$  |
| <i>RUVBL1</i>  | 3q21.3  | protein_coding | 1.63  | $4.98 \times 10^{-18}$ |
| <i>ACAD9</i>   | 3q21.3  | protein_coding | 1.14  | $7.77 \times 10^{-6}$  |
| <i>ACPP</i>    | 3q22.1  | protein_coding | -1.84 | $1.07 \times 10^{-3}$  |
| <i>SOX14</i>   | 3q22.3  | protein_coding | 3.47  | $5.56 \times 10^{-3}$  |
| <i>DHX36</i>   | 3q25.2  | protein_coding | -1.08 | $4.12 \times 10^{-3}$  |
| <i>TRIM59</i>  | 3q25.33 | protein_coding | 1.41  | $2.00 \times 10^{-5}$  |
| <i>LRR1Q4</i>  | 3q26.2  | protein_coding | -1.27 | $1.70 \times 10^{-3}$  |
| <i>ATP11B</i>  | 3q26.33 | protein_coding | 1.37  | $2.37 \times 10^{-5}$  |

|                 |         |                |       |                        |
|-----------------|---------|----------------|-------|------------------------|
| <i>MAEA</i>     | 4p16.3  | protein_coding | 1.14  | $2.13 \times 10^{-5}$  |
| <i>UNC5C</i>    | 4q22.3  | protein_coding | -2.45 | $5.21 \times 10^{-7}$  |
| <i>PPA2</i>     | 4q24    | protein_coding | 1.26  | $1.43 \times 10^{-8}$  |
| <i>CYP2U1</i>   | 4q25    | protein_coding | 1.05  | 0.02                   |
| <i>MRPL36</i>   | 5p15.33 | protein_coding | 1.40  | $4.83 \times 10^{-8}$  |
| <i>JADE2</i>    | 5q31.1  | protein_coding | -1.46 | $2.09 \times 10^{-10}$ |
| <i>GDF9</i>     | 5q31.1  | protein_coding | 1.38  | $3.27 \times 10^{-4}$  |
| <i>NDST1</i>    | 5q33.1  | protein_coding | 1.16  | 0.02                   |
| <i>CNPY3</i>    | 6p21.1  | protein_coding | 1.27  | $2.49 \times 10^{-3}$  |
| <i>UHRF1BP1</i> | 6p21.31 | protein_coding | 1.28  | $1.15 \times 10^{-4}$  |
| <i>TAF11</i>    | 6p21.31 | protein_coding | 1.07  | 0.03                   |
| <i>SLC39A7</i>  | 6p21.32 | protein_coding | 1.38  | $1.98 \times 10^{-8}$  |
| <i>VAR52</i>    | 6p21.33 | protein_coding | 1.42  | $3.01 \times 10^{-10}$ |
| <i>LY6G5C</i>   | 6p21.33 | protein_coding | 1.68  | $3.26 \times 10^{-9}$  |
| <i>SAPCD1</i>   | 6p21.33 | protein_coding | 2.45  | $4.95 \times 10^{-9}$  |
| <i>C4A</i>      | 6p21.33 | protein_coding | 2.51  | $3.03 \times 10^{-8}$  |
| <i>STK19</i>    | 6p21.33 | protein_coding | 1.30  | $1.05 \times 10^{-7}$  |
| <i>TCF19</i>    | 6p21.33 | protein_coding | -1.18 | $2.14 \times 10^{-6}$  |
| <i>HLA-E</i>    | 6p21.33 | protein_coding | -1.28 | $3.27 \times 10^{-6}$  |
| <i>DDAH2</i>    | 6p21.33 | protein_coding | 1.23  | $2.67 \times 10^{-3}$  |
| <i>MICB</i>     | 6p21.33 | protein_coding | -1.27 | $2.74 \times 10^{-3}$  |
| <i>SFTA2</i>    | 6p21.33 | protein_coding | -2.18 | 0.01                   |
| <i>NELFE</i>    | 6p21.33 | protein_coding | 1.17  | 0.01                   |
| <i>ATF6B</i>    | 6p21.33 | protein_coding | 1.07  | 0.03                   |

|                 |         |                |       |                        |
|-----------------|---------|----------------|-------|------------------------|
| <i>PRSS16</i>   | 6p22.1  | protein_coding | -2.22 | $8.87 \times 10^{-15}$ |
| <i>RPP21</i>    | 6p22.1  | protein_coding | 1.28  | $9.93 \times 10^{-4}$  |
| <i>ZNRD1</i>    | 6p22.1  | protein_coding | 1.16  | $4.69 \times 10^{-3}$  |
| <i>RIPK1</i>    | 6p25.2  | protein_coding | -1.05 | 0.04                   |
| <i>C6orf163</i> | 6q15    | protein_coding | 1.70  | $7.02 \times 10^{-5}$  |
| <i>NCOA7</i>    | 6q22.32 | protein_coding | -1.49 | $8.26 \times 10^{-4}$  |
| <i>RGS17</i>    | 6q25.2  | protein_coding | 1.75  | $2.32 \times 10^{-4}$  |
| <i>SLC22A2</i>  | 6q25.3  | protein_coding | -2.79 | $2.09 \times 10^{-7}$  |
| <i>SLC22A3</i>  | 6q25.3  | protein_coding | -1.52 | $2.06 \times 10^{-4}$  |
| <i>IGF2R</i>    | 6q25.3  | protein_coding | 1.23  | $5.14 \times 10^{-3}$  |
| <i>HOXA2</i>    | 7p15.2  | protein_coding | -1.79 | 0.03                   |
| <i>CDCA7L</i>   | 7p15.3  | protein_coding | -1.27 | $1.39 \times 10^{-5}$  |
| <i>TECPRI</i>   | 7q21.3  | protein_coding | 1.38  | $5.87 \times 10^{-7}$  |
| <i>BHLHA15</i>  | 7q21.3  | protein_coding | 1.94  | $2.40 \times 10^{-5}$  |
| <i>DOCK5</i>    | 8p21.2  | protein_coding | -1.37 | $8.17 \times 10^{-5}$  |
| <i>CHMP7</i>    | 8p21.3  | protein_coding | -1.19 | $1.96 \times 10^{-7}$  |
| <i>POU5F1B</i>  | 8q24.21 | protein_coding | 2.58  | $2.84 \times 10^{-14}$ |
| <i>THEM6</i>    | 8q24.3  | protein_coding | 1.43  | $2.18 \times 10^{-7}$  |
| <i>UBAP2</i>    | 9p13.3  | protein_coding | 1.24  | $2.62 \times 10^{-7}$  |
| <i>UNC13B</i>   | 9p13.3  | protein_coding | 1.24  | $1.55 \times 10^{-4}$  |
| <i>SAXO1</i>    | 9p22.1  | protein_coding | -2.25 | 0.05                   |
| <i>TXN</i>      | 9q31.3  | protein_coding | 1.76  | $1.40 \times 10^{-14}$ |
| <i>CFAP157</i>  | 9q34.11 | protein_coding | 2.56  | $3.16 \times 10^{-10}$ |
| <i>PTRH1</i>    | 9q34.11 | protein_coding | 1.53  | $1.38 \times 10^{-7}$  |

|                  |          |                |       |                        |
|------------------|----------|----------------|-------|------------------------|
| <i>BRD3</i>      | 9q34.2   | protein_coding | 1.19  | $1.98 \times 10^{-3}$  |
| <i>WDR37</i>     | 10p15.3  | protein_coding | 1.20  | $7.89 \times 10^{-4}$  |
| <i>ZNF22</i>     | 10q11.21 | protein_coding | 1.17  | $7.84 \times 10^{-4}$  |
| <i>HKDC1</i>     | 10q22.1  | protein_coding | -1.14 | $6.46 \times 10^{-3}$  |
| <i>PLAC9</i>     | 10q22.3  | protein_coding | -2.17 | $1.57 \times 10^{-9}$  |
| <i>WBP1L</i>     | 10q24.32 | protein_coding | -1.24 | $1.23 \times 10^{-8}$  |
| <i>ARL3</i>      | 10q24.32 | protein_coding | -1.09 | $6.39 \times 10^{-3}$  |
| <i>EEF1AKMT2</i> | 10q26.13 | protein_coding | 1.16  | $5.04 \times 10^{-4}$  |
| <i>CTBP2</i>     | 10q26.13 | protein_coding | 1.12  | 0.02                   |
| <i>NUP160</i>    | 11p11.2  | protein_coding | -1.23 | $9.66 \times 10^{-6}$  |
| <i>MOB2</i>      | 11p15.5  | protein_coding | -1.04 | 0.04                   |
| <i>GSTP1</i>     | 11q13.2  | protein_coding | -4.07 | $4.75 \times 10^{-19}$ |
| <i>NUDT8</i>     | 11q13.2  | protein_coding | 3.55  | $1.26 \times 10^{-9}$  |
| <i>RAD9A</i>     | 11q13.2  | protein_coding | 1.40  | $5.87 \times 10^{-7}$  |
| <i>NDUFV1</i>    | 11q13.2  | protein_coding | 1.22  | $5.41 \times 10^{-3}$  |
| <i>TROAP</i>     | 12q13.12 | protein_coding | 3.80  | $6.06 \times 10^{-18}$ |
| <i>DCN</i>       | 12q21.33 | protein_coding | -2.02 | $5.90 \times 10^{-7}$  |
| <i>ATP2A2</i>    | 12q24.11 | protein_coding | -1.22 | $1.36 \times 10^{-5}$  |
| <i>RBM23</i>     | 14q11.2  | protein_coding | -1.09 | $4.98 \times 10^{-5}$  |
| <i>NOVA1</i>     | 14q12    | protein_coding | -1.63 | $1.28 \times 10^{-3}$  |
| <i>ERO1A</i>     | 14q22.1  | protein_coding | -1.48 | $2.15 \times 10^{-8}$  |
| <i>ZNF839</i>    | 14q32.31 | protein_coding | 1.17  | $5.59 \times 10^{-5}$  |
| <i>MYO5C</i>     | 15q21.2  | protein_coding | 1.21  | $3.95 \times 10^{-3}$  |
| <i>SPPL2A</i>    | 15q21.2  | protein_coding | -1.12 | 0.01                   |

|                |          |                |       |                        |
|----------------|----------|----------------|-------|------------------------|
| <i>MPI</i>     | 15q24.1  | protein_coding | 1.33  | $4.63 \times 10^{-10}$ |
| <i>FAM219B</i> | 15q24.1  | protein_coding | 1.25  | $7.26 \times 10^{-9}$  |
| <i>XPO6</i>    | 16p11.2  | protein_coding | 1.69  | $5.20 \times 10^{-17}$ |
| <i>TELO2</i>   | 16p13.3  | protein_coding | 1.60  | $1.10 \times 10^{-13}$ |
| <i>HMOX2</i>   | 16p13.3  | protein_coding | 1.27  | $2.72 \times 10^{-7}$  |
| <i>NUBP2</i>   | 16p13.3  | protein_coding | 1.23  | $2.14 \times 10^{-3}$  |
| <i>FLYWCH2</i> | 16p13.3  | protein_coding | 1.18  | 0.03                   |
| <i>IRX5</i>    | 16q12.2  | protein_coding | -1.31 | $1.07 \times 10^{-3}$  |
| <i>ATPAF2</i>  | 17p11.2  | protein_coding | 1.24  | $3.98 \times 10^{-7}$  |
| <i>SMYD4</i>   | 17p13.3  | protein_coding | -1.38 | $6.71 \times 10^{-9}$  |
| <i>MRM3</i>    | 17p13.3  | protein_coding | 1.24  | $2.95 \times 10^{-5}$  |
| <i>FBXL20</i>  | 17q12    | protein_coding | -1.09 | $7.93 \times 10^{-3}$  |
| <i>TLL6</i>    | 17q21.32 | protein_coding | 2.43  | $1.04 \times 10^{-11}$ |
| <i>ZNF652</i>  | 17q21.32 | protein_coding | 1.48  | $2.34 \times 10^{-8}$  |
| <i>CDC27</i>   | 17q21.32 | protein_coding | -1.15 | $2.18 \times 10^{-5}$  |
| <i>LRRC46</i>  | 17q21.32 | protein_coding | 1.90  | 0.02                   |
| <i>MKS1</i>    | 17q22    | protein_coding | 1.14  | $1.04 \times 10^{-4}$  |
| <i>TM6SF2</i>  | 19p13.11 | protein_coding | -1.21 | $9.03 \times 10^{-3}$  |
| <i>CLIP3</i>   | 19q13.12 | protein_coding | -2.61 | $6.67 \times 10^{-14}$ |
| <i>ZNF875</i>  | 19q13.12 | protein_coding | 1.38  | $9.86 \times 10^{-10}$ |
| <i>COX6B1</i>  | 19q13.12 | protein_coding | 1.23  | 0.04                   |
| <i>SIPA1L3</i> | 19q13.13 | protein_coding | 1.42  | $9.80 \times 10^{-9}$  |
| <i>KCNK6</i>   | 19q13.2  | protein_coding | -1.16 | 0.02                   |
| <i>ERF</i>     | 19q13.2  | protein_coding | -1.16 | 0.04                   |

|                |          |                |       |                        |
|----------------|----------|----------------|-------|------------------------|
| <i>BCAM</i>    | 19q13.32 | protein_coding | 1.96  | $8.04 \times 10^{-13}$ |
| <i>KLK4</i>    | 19q13.41 | protein_coding | 1.72  | $5.13 \times 10^{-6}$  |
| <i>EFCAB8</i>  | 20q11.21 | protein_coding | 1.71  | 0.01                   |
| <i>WFDC10B</i> | 20q13.12 | protein_coding | -3.25 | $7.07 \times 10^{-4}$  |
| <i>HELZ2</i>   | 20q13.33 | protein_coding | 1.67  | $5.63 \times 10^{-9}$  |
| <i>RTEL1</i>   | 20q13.33 | protein_coding | 1.25  | $1.12 \times 10^{-5}$  |
| <i>LAMA5</i>   | 20q13.33 | protein_coding | -1.20 | 0.02                   |
| <i>ARFRP1</i>  | 20q13.33 | protein_coding | 1.19  | 0.02                   |
| <i>TMPRSS2</i> | 21q22.3  | protein_coding | 1.34  | $4.84 \times 10^{-3}$  |
| <i>ICOSLG</i>  | 21q22.3  | protein_coding | 1.21  | $6.20 \times 10^{-3}$  |
| <i>ARFGAP3</i> | 22q13.2  | protein_coding | 1.27  | $4.06 \times 10^{-5}$  |
| <i>FAM118A</i> | 22q13.31 | protein_coding | 1.32  | 0.03                   |

*P* value: associations with FDR-corrected *P* value  $\leq 0.05$  considered significant

**Supplementary Table 8** 151 CpG sites showing biologically significant differential methylation levels between prostate tumor and tumor adjacent normal samples

| Gene Symbol           | Probe ID   | r <sup>a</sup> | P <sup>a</sup>              | P-value after FDR <sup>a</sup> | Method   |
|-----------------------|------------|----------------|-----------------------------|--------------------------------|----------|
| <i>GSTP1</i>          | cg06928838 | -0.37          | 0.03                        | 0.20                           | Spearman |
|                       | cg09038676 | -0.46          | 5.70×10 <sup>-3</sup>       | 0.05                           | Spearman |
|                       | cg11566244 | -0.40          | 0.02                        | 0.13                           | Pearson  |
|                       | cg22224704 | -0.44          | 9.93×10 <sup>-3</sup>       | 0.07                           | Pearson  |
|                       | cg26250609 | -0.30          | 0.08                        | 0.32                           | Spearman |
| <i>XPO6</i>           | cg00468395 | 0.13           | 0.45                        | 0.77                           | Spearman |
| <i>CLIP3</i>          | cg22719241 | 0.08           | 0.66                        | 0.88                           | Spearman |
| <i>TELO2</i>          | cg26751513 | -0.34          | 0.05                        | 0.24                           | Spearman |
| <i>AMT;NICN1</i>      | cg02251567 | -0.83          | <b>1.10×10<sup>-9</sup></b> | <b>1.65×10<sup>-7</sup></b>    | Pearson  |
|                       | cg05924489 | -0.80          | <b>1.38×10<sup>-8</sup></b> | <b>5.23×10<sup>-7</sup></b>    | Pearson  |
|                       | cg14184400 | -0.80          | <b>1.14×10<sup>-8</sup></b> | <b>5.23×10<sup>-7</sup></b>    | Pearson  |
|                       | cg15246085 | -0.80          | <b>1.38×10<sup>-8</sup></b> | <b>5.23×10<sup>-7</sup></b>    | Pearson  |
|                       | cg17877071 | -0.79          | <b>3.05×10<sup>-8</sup></b> | <b>8.34×10<sup>-7</sup></b>    | Pearson  |
|                       | cg20191453 | -0.79          | <b>3.31×10<sup>-8</sup></b> | <b>8.34×10<sup>-7</sup></b>    | Pearson  |
|                       | cg21926782 | -0.78          | <b>4.98×10<sup>-8</sup></b> | <b>1.07×10<sup>-6</sup></b>    | Pearson  |
| <i>LDAH (C2orf43)</i> | cg20248458 | -0.52          | 1.65×10 <sup>-3</sup>       | <b>0.02</b>                    | Pearson  |
| <i>HDLBP</i>          | cg07030287 | -0.31          | 0.08                        | 0.32                           | Spearman |
|                       | cg13145289 | -0.45          | 8.17×10 <sup>-3</sup>       | 0.07                           | Pearson  |
| <i>VAR52</i>          | cg00933603 | -0.70          | <b>3.78×10<sup>-6</sup></b> | <b>6.34×10<sup>-5</sup></b>    | Pearson  |
|                       | cg02149965 | -0.52          | 1.78×10 <sup>-3</sup>       | <b>0.02</b>                    | Pearson  |
|                       | cg06879746 | 0.04           | 0.81                        | 0.96                           | Spearman |



|                      |            |       |                             |                             |          |
|----------------------|------------|-------|-----------------------------|-----------------------------|----------|
|                      | cg27057509 | -0.07 | 0.68                        | 0.88                        | Spearman |
|                      | cg02306936 | 0.11  | 0.55                        | 0.80                        | Spearman |
| <i>AMIGO3;RNF123</i> | cg03719380 | 0.09  | 0.62                        | 0.86                        | Spearman |
|                      | cg22993195 | -0.09 | 0.62                        | 0.86                        | Spearman |
| <i>EFHD1</i>         | cg02806452 | -0.04 | 0.81                        | 0.96                        | Spearman |
| <i>ZNF875 (HKR1)</i> | cg12147799 | 0.04  | 0.82                        | 0.96                        | Spearman |
| <i>PLAC9</i>         | cg08435131 | 0.07  | 0.69                        | 0.88                        | Spearman |
| <i>SMYD4</i>         | cg16616918 | -0.69 | <b>6.20×10<sup>-6</sup></b> | <b>9.36×10<sup>-5</sup></b> | Pearson  |
| <i>SIPA1L3</i>       | cg21281463 | -0.12 | 0.50                        | 0.78                        | Spearman |
| <i>SLC39A7</i>       | cg03600823 | -0.29 | 0.09                        | 0.35                        | Spearman |
|                      | cg05200373 | -0.11 | 0.55                        | 0.80                        | Spearman |
|                      | cg08133228 | -0.13 | 0.47                        | 0.77                        | Spearman |
|                      | cg08660395 | -0.13 | 0.45                        | 0.77                        | Spearman |
|                      | cg08846245 | -0.22 | 0.22                        | 0.58                        | Spearman |
|                      | cg10673265 | -0.14 | 0.43                        | 0.77                        | Spearman |
|                      | cg13747899 | -0.02 | 0.89                        | 0.97                        | Spearman |
|                      | cg14348706 | -0.18 | 0.30                        | 0.68                        | Spearman |
|                      | cg15105576 | 0.01  | 0.94                        | 0.98                        | Spearman |
|                      | cg17435901 | -0.21 | 0.23                        | 0.58                        | Spearman |
| <i>ZNF652</i>        | cg07164631 | -0.28 | 0.11                        | 0.37                        | Spearman |
| <i>C4A;C4B</i>       | cg11433081 | 0.15  | 0.39                        | 0.77                        | Spearman |
| <i>ADAM15;EFNA4</i>  | cg13069100 | 0.72  | <b>1.75×10<sup>-6</sup></b> | <b>3.31×10<sup>-5</sup></b> | Pearson  |
| <i>STK19;DOM3Z</i>   | cg01883966 | 0.07  | 0.68                        | 0.88                        | Spearman |
|                      | cg05626376 | -0.12 | 0.50                        | 0.78                        | Spearman |

|                       |            |       |                       |      |          |
|-----------------------|------------|-------|-----------------------|------|----------|
|                       | cg12456973 | 0.02  | 0.90                  | 0.97 | Spearman |
|                       | cg15063771 | 0.00  | 1.00                  | 1.00 | Spearman |
|                       | cg15965006 | 0.03  | 0.89                  | 0.97 | Spearman |
|                       | cg17339327 | -0.02 | 0.92                  | 0.97 | Spearman |
|                       | cg19864808 | -0.03 | 0.88                  | 0.97 | Spearman |
|                       | cg26029547 | -0.06 | 0.74                  | 0.90 | Spearman |
| <i>HMOX2</i>          | cg06605704 | -0.15 | 0.39                  | 0.77 | Spearman |
| <i>HLA-E</i>          | cg09326440 | -0.16 | 0.38                  | 0.76 | Spearman |
|                       | cg12700271 | -0.31 | 0.08                  | 0.32 | Spearman |
|                       | cg21176130 | -0.12 | 0.48                  | 0.77 | Spearman |
| <i>KLK4</i>           | cg08697116 | -0.40 | 0.02                  | 0.13 | Spearman |
|                       | cg11976052 | -0.26 | 0.13                  | 0.42 | Spearman |
|                       | cg26827876 | -0.27 | 0.12                  | 0.40 | Spearman |
|                       | cg27128734 | -0.38 | 0.03                  | 0.17 | Spearman |
| <i>RTEL1</i>          | cg05358404 | 0.11  | 0.54                  | 0.80 | Spearman |
|                       | cg20597143 | -0.06 | 0.76                  | 0.91 | Spearman |
| <i>TRIM59</i>         | cg15618978 | 0.45  | $8.06 \times 10^{-3}$ | 0.06 | Spearman |
| <i>MAEA</i>           | cg03096285 | 0.12  | 0.48                  | 0.77 | Spearman |
| <i>CDC27</i>          | cg10910775 | -0.12 | 0.51                  | 0.78 | Spearman |
| <i>BHLHA15</i>        | cg20061890 | -0.26 | 0.14                  | 0.45 | Spearman |
| <i>MRM3 (RNMTL1)</i>  | cg07479618 | -0.08 | 0.66                  | 0.88 | Spearman |
|                       | cg17094593 | -0.02 | 0.92                  | 0.97 | Spearman |
|                       | cg25521254 | 0.03  | 0.85                  | 0.96 | Spearman |
| <i>CFAP44 (WDR52)</i> | cg07054641 | -0.17 | 0.33                  | 0.71 | Spearman |

|                    |            |       |                       |             |          |
|--------------------|------------|-------|-----------------------|-------------|----------|
|                    | cg11921736 | -0.13 | 0.45                  | 0.77        | Spearman |
|                    | cg24199400 | -0.15 | 0.40                  | 0.77        | Spearman |
| <i>UBA7</i>        | cg13343687 | -0.48 | $3.76 \times 10^{-3}$ | <b>0.04</b> | Pearson  |
|                    | cg19381811 | -0.47 | $5.24 \times 10^{-3}$ | 0.05        | Pearson  |
| <i>C6orf163</i>    | cg25658884 | -0.33 | 0.06                  | 0.27        | Spearman |
| <i>DOCK5</i>       | cg03458012 | 0.29  | 0.09                  | 0.35        | Spearman |
|                    | cg05039382 | 0.01  | 0.97                  | 0.99        | Spearman |
| <i>SLC22A3</i>     | cg09226986 | -0.18 | 0.30                  | 0.68        | Spearman |
| <i>CASP8</i>       | cg20608990 | -0.44 | $8.85 \times 10^{-3}$ | 0.07        | Pearson  |
| <i>NTRK1;INSRR</i> | cg01357370 | -0.18 | 0.30                  | 0.68        | Spearman |
|                    | cg03888033 | -0.02 | 0.91                  | 0.97        | Spearman |
|                    | cg11793699 | -0.13 | 0.48                  | 0.77        | Spearman |
|                    | cg16438688 | -0.19 | 0.29                  | 0.68        | Spearman |
| <i>WFDC10B</i>     | cg11783356 | 0.24  | 0.16                  | 0.47        | Spearman |
| <i>IRX5</i>        | cg01901262 | -0.32 | 0.07                  | 0.30        | Spearman |
|                    | cg09492451 | -0.10 | 0.56                  | 0.80        | Spearman |
|                    | cg10824810 | -0.46 | $6.19 \times 10^{-3}$ | 0.05        | Spearman |
| <i>DDAH2</i>       | cg00941576 | 0.19  | 0.28                  | 0.68        | Spearman |
|                    | cg01066220 | 0.13  | 0.46                  | 0.77        | Spearman |
|                    | cg04074004 | 0.08  | 0.66                  | 0.88        | Spearman |
|                    | cg08021615 | 0.36  | 0.04                  | 0.20        | Spearman |
|                    | cg08509383 | 0.14  | 0.44                  | 0.77        | Spearman |
|                    | cg09632273 | 0.09  | 0.61                  | 0.86        | Spearman |
|                    | cg14016554 | 0.18  | 0.30                  | 0.68        | Spearman |

|                                    |            |       |      |      |          |
|------------------------------------|------------|-------|------|------|----------|
|                                    | cg14293129 | 0.25  | 0.16 | 0.46 | Spearman |
|                                    | cg16359915 | 0.16  | 0.37 | 0.76 | Spearman |
|                                    | cg19008099 | 0.15  | 0.41 | 0.77 | Spearman |
|                                    | cg23348155 | 0.11  | 0.52 | 0.79 | Spearman |
|                                    | cg25095032 | 0.07  | 0.70 | 0.88 | Spearman |
|                                    | cg26111283 | 0.28  | 0.11 | 0.37 | Spearman |
|                                    | cg26978172 | 0.14  | 0.43 | 0.77 | Spearman |
| <i>MYO5C</i>                       | cg24590708 | -0.20 | 0.25 | 0.63 | Spearman |
| <i>ZNRD1;NCRNA00171</i>            | cg06155771 | -0.24 | 0.17 | 0.47 | Spearman |
|                                    | cg07468289 | -0.33 | 0.05 | 0.26 | Spearman |
| <i>IGF2R</i>                       | cg03064642 | -0.13 | 0.45 | 0.77 | Spearman |
|                                    | cg09555124 | -0.02 | 0.93 | 0.97 | Spearman |
|                                    | cg23746600 | -0.04 | 0.84 | 0.96 | Spearman |
| <i>SLC41A1</i>                     | cg09790270 | 0.30  | 0.09 | 0.33 | Spearman |
| <i>ARL3</i>                        | cg06361405 | -0.17 | 0.35 | 0.73 | Spearman |
|                                    | cg24435571 | -0.17 | 0.35 | 0.73 | Spearman |
| <i>TM6SF2</i>                      | cg14021871 | 0.12  | 0.51 | 0.78 | Spearman |
| <i>GMPPB</i>                       | cg00589488 | -0.08 | 0.67 | 0.88 | Spearman |
| <i>SFTA2</i>                       | cg15992932 | 0.01  | 0.97 | 0.99 | Spearman |
|                                    | cg25784359 | -0.34 | 0.05 | 0.24 | Spearman |
| <i>NELFE (RDBP);SKIV2L;MIR1236</i> | cg01734628 | -0.09 | 0.61 | 0.86 | Spearman |
|                                    | cg08810053 | 0.06  | 0.72 | 0.89 | Spearman |
| <i>EFCAB8</i>                      | cg01047613 | 0.25  | 0.16 | 0.47 | Spearman |
|                                    | cg01845111 | -0.13 | 0.45 | 0.77 | Spearman |

|                     |            |       |                       |             |          |
|---------------------|------------|-------|-----------------------|-------------|----------|
|                     | cg25292098 | 0.07  | 0.71                  | 0.89        | Spearman |
| <i>LAMA5</i>        | cg12382846 | -0.03 | 0.86                  | 0.96        | Spearman |
|                     | cg15782228 | -0.35 | 0.04                  | 0.22        | Spearman |
|                     | cg18668449 | 0.00  | 1.00                  | 1.00        | Spearman |
| <i>ARFRP1</i>       | cg08554554 | 0.28  | 0.11                  | 0.37        | Spearman |
| <i>NDST1</i>        | cg04091768 | 0.22  | 0.21                  | 0.58        | Spearman |
|                     | cg06677890 | 0.07  | 0.70                  | 0.88        | Spearman |
|                     | cg07672051 | -0.01 | 0.96                  | 0.99        | Spearman |
|                     | cg16674484 | 0.11  | 0.54                  | 0.80        | Spearman |
| <i>CTBP2</i>        | cg08203849 | -0.27 | 0.13                  | 0.41        | Spearman |
|                     | cg09872760 | -0.17 | 0.34                  | 0.73        | Spearman |
|                     | cg13292607 | 0.02  | 0.89                  | 0.97        | Spearman |
|                     | cg18744792 | 0.04  | 0.81                  | 0.96        | Spearman |
|                     | cg22548109 | 0.21  | 0.23                  | 0.58        | Spearman |
|                     | cg23992194 | -0.38 | 0.03                  | 0.17        | Spearman |
| <i>ATF6B;FKBPL</i>  | cg09149894 | -0.49 | $3.42 \times 10^{-3}$ | <b>0.03</b> | Pearson  |
|                     | cg22302772 | -0.14 | 0.42                  | 0.77        | Spearman |
|                     | cg26467536 | 0.16  | 0.38                  | 0.76        | Spearman |
| <i>YBX1</i>         | cg07603685 | -0.06 | 0.73                  | 0.89        | Spearman |
| <i>SRGAP3</i>       | cg12669543 | -0.53 | $1.30 \times 10^{-3}$ | <b>0.02</b> | Pearson  |
|                     | cg21386647 | -0.18 | 0.32                  | 0.70        | Spearman |
|                     | cg23958524 | -0.36 | 0.04                  | 0.21        | Spearman |
| <i>MOB2 (HCCA2)</i> | cg00367424 | 0.20  | 0.26                  | 0.64        | Spearman |
|                     | cg01607530 | -0.02 | 0.92                  | 0.97        | Spearman |

|                        |            |       |      |      |          |
|------------------------|------------|-------|------|------|----------|
|                        | cg02248763 | 0.04  | 0.84 | 0.96 | Spearman |
|                        | cg06524570 | 0.13  | 0.46 | 0.77 | Spearman |
|                        | cg08269485 | -0.13 | 0.45 | 0.77 | Spearman |
|                        | cg13365972 | 0.22  | 0.21 | 0.57 | Spearman |
|                        | cg16941568 | 0.28  | 0.10 | 0.37 | Spearman |
|                        | cg19749898 | 0.08  | 0.65 | 0.88 | Spearman |
|                        | cg23598212 | 0.06  | 0.72 | 0.89 | Spearman |
|                        | cg26395193 | 0.03  | 0.85 | 0.96 | Spearman |
| <i>SAXO1 (FAM154A)</i> | cg14553740 | -0.25 | 0.15 | 0.45 | Spearman |

<sup>a</sup> *P* value: derived from 34 prostatic tumor tissue samples and paired normal prostatic tissue samples.

**Supplementary Table 9** Pathway enrichment analyses of associated protein-coding genes

| Gene                                                                 | Top canonical pathways                                                                                                                                                                                                                                                                       | Related diseases and disorders                                                                                                 | Molecular and Cellular Functions                                                                              | Top networks                                                                                                                                                                                                                                                                                                   |
|----------------------------------------------------------------------|----------------------------------------------------------------------------------------------------------------------------------------------------------------------------------------------------------------------------------------------------------------------------------------------|--------------------------------------------------------------------------------------------------------------------------------|---------------------------------------------------------------------------------------------------------------|----------------------------------------------------------------------------------------------------------------------------------------------------------------------------------------------------------------------------------------------------------------------------------------------------------------|
| 449 protein-coding genes with FDR-corrected significant associations | Antigen Presentation Pathway ( $P = 1.08 \times 10^{-9}$ ); Th1 Pathway ( $P = 6.36 \times 10^{-5}$ ); T Cell Exhaustion Signaling Pathway ( $P = 8.72 \times 10^{-5}$ ); Allograft Rejection Signaling ( $P = 1.54 \times 10^{-4}$ ); OX40 Signaling Pathway ( $P = 1.96 \times 10^{-4}$ ). | Cancer; Organismal Injury and Abnormalities; Endocrine System Disorders; Gastrointestinal Disease; Connective Tissue Disorders | Cell Death and Survival; Cell Cycle; Gene Expression; Cellular Development; Cellular Growth and Proliferation | Gene Expression, Hereditary Disorder, Metabolic Disease; Cell Cycle, Cell Morphology, Free Radical Scavenging; Cellular Assembly and Organization, Hair and Skin Development and Function, Cell Death and Survival; Cell Cycle, DNA Replication, Recombination, and Repair, Cellular Assembly and Organization |
